# Supplementary material
Source: bioRxiv or medRxiv preprint supplement (https://www.biorxiv.org/highwire/filestream/47715/field_highwire_adjunct_files/0/091512-1.pdf)

Figure S1 A

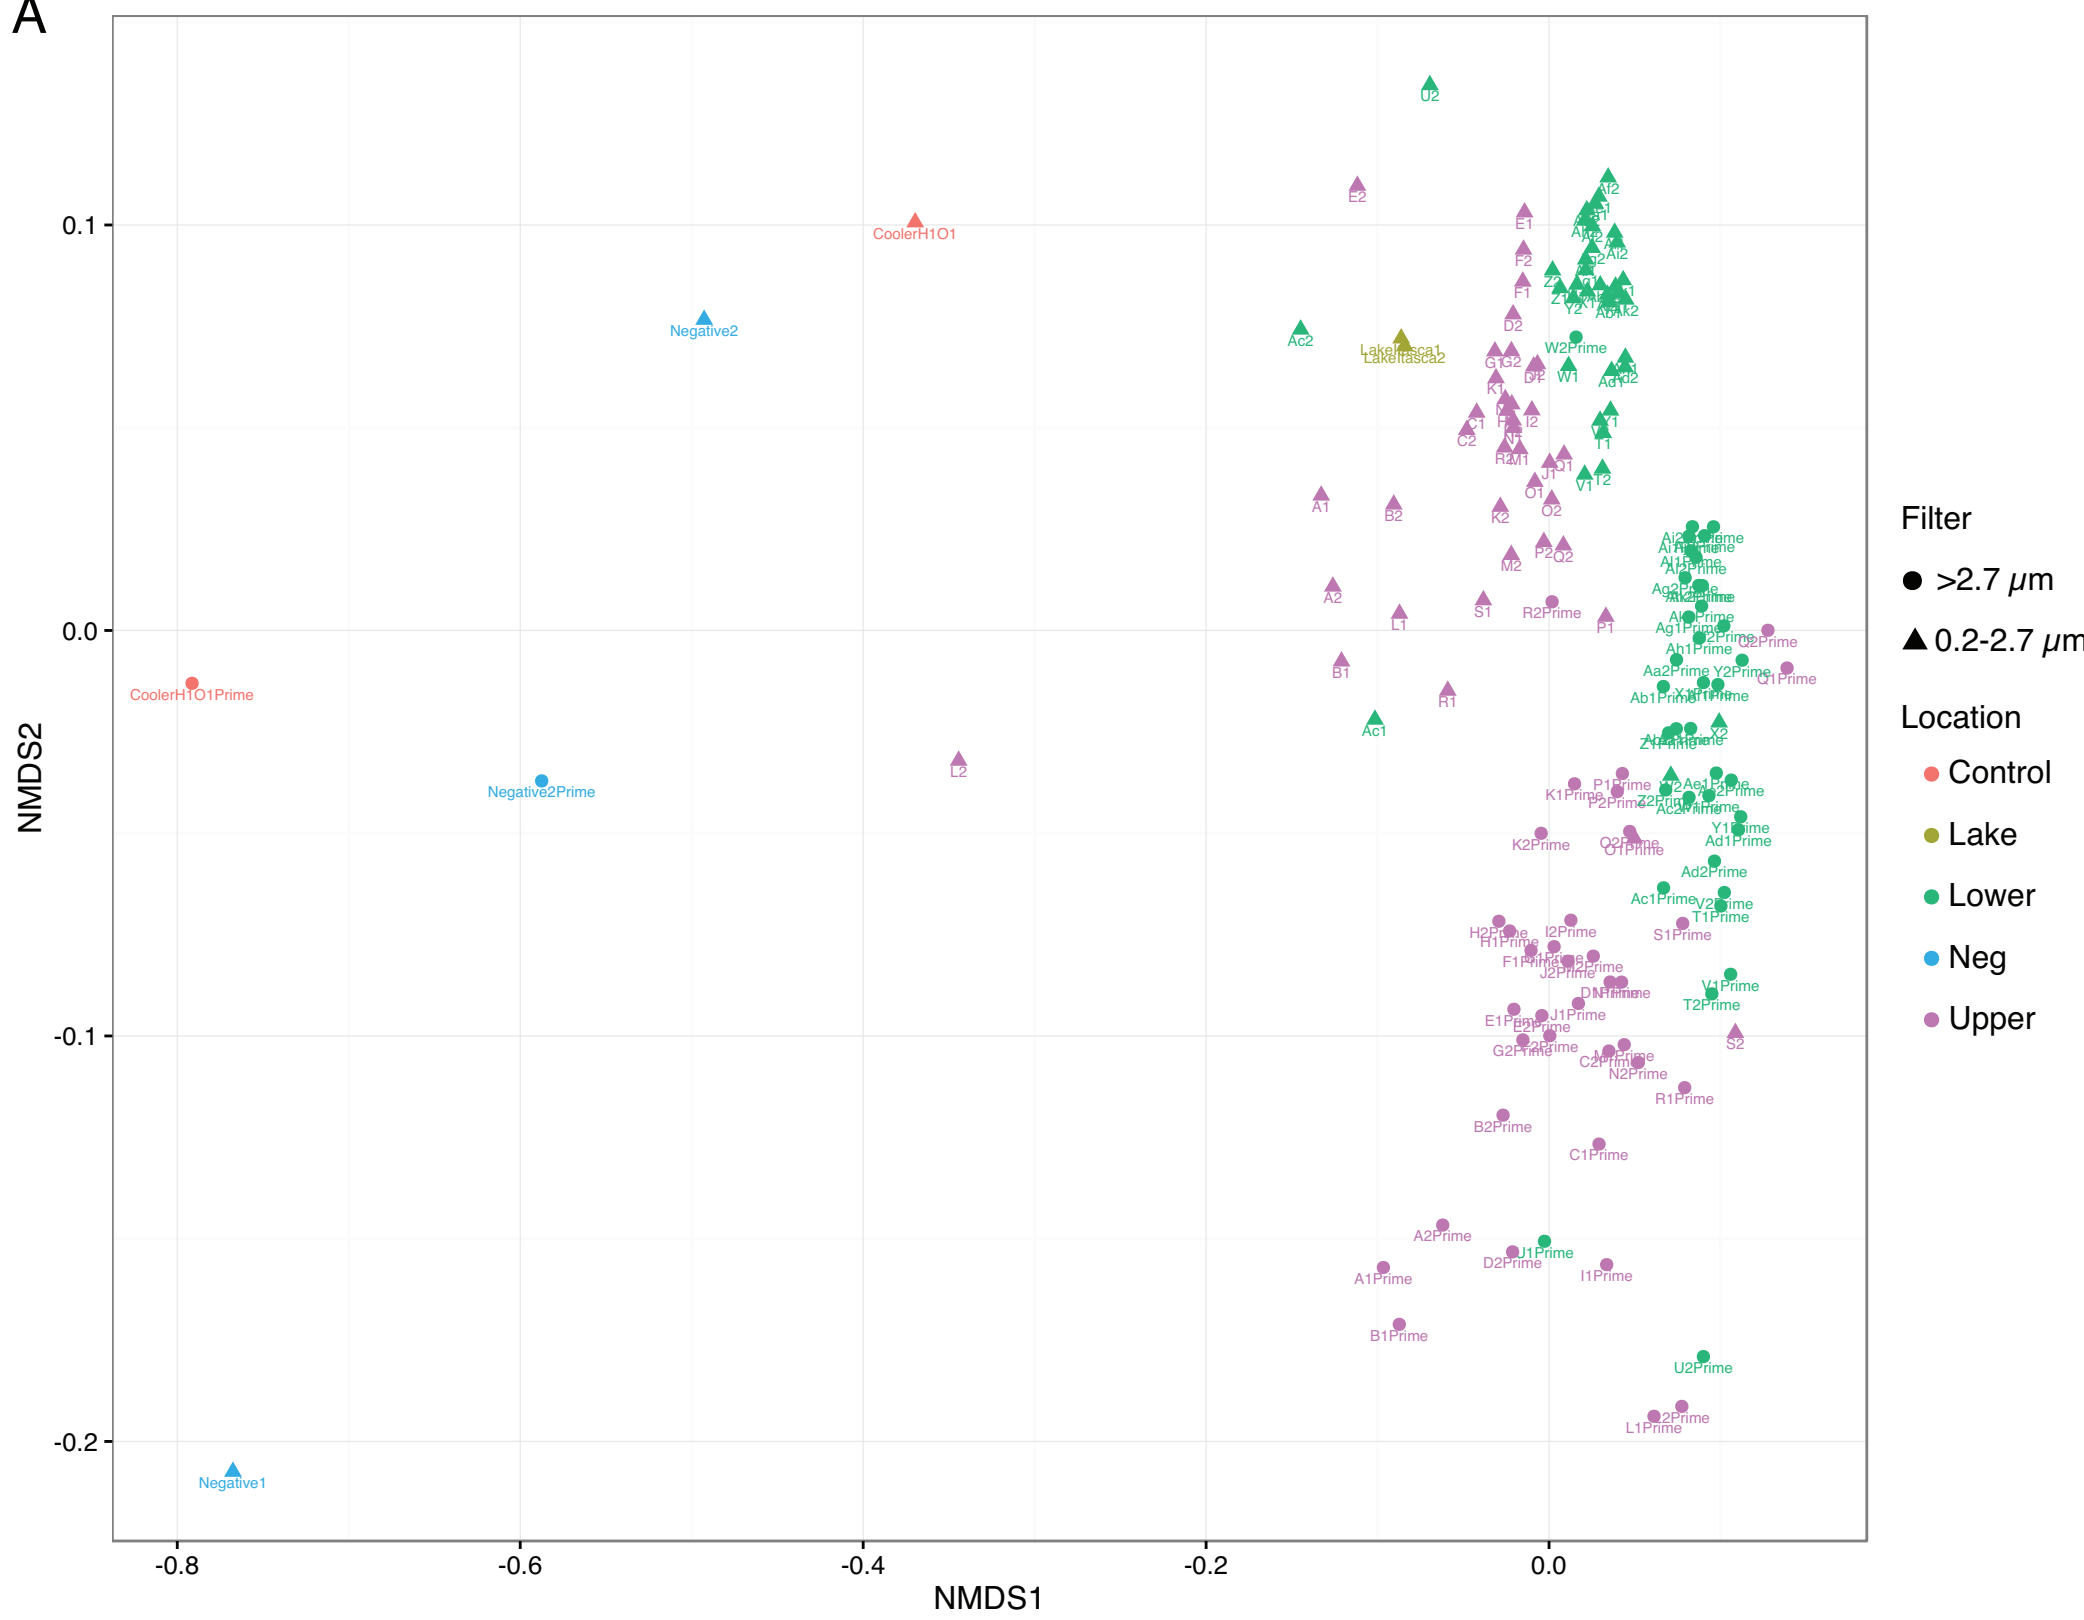

B

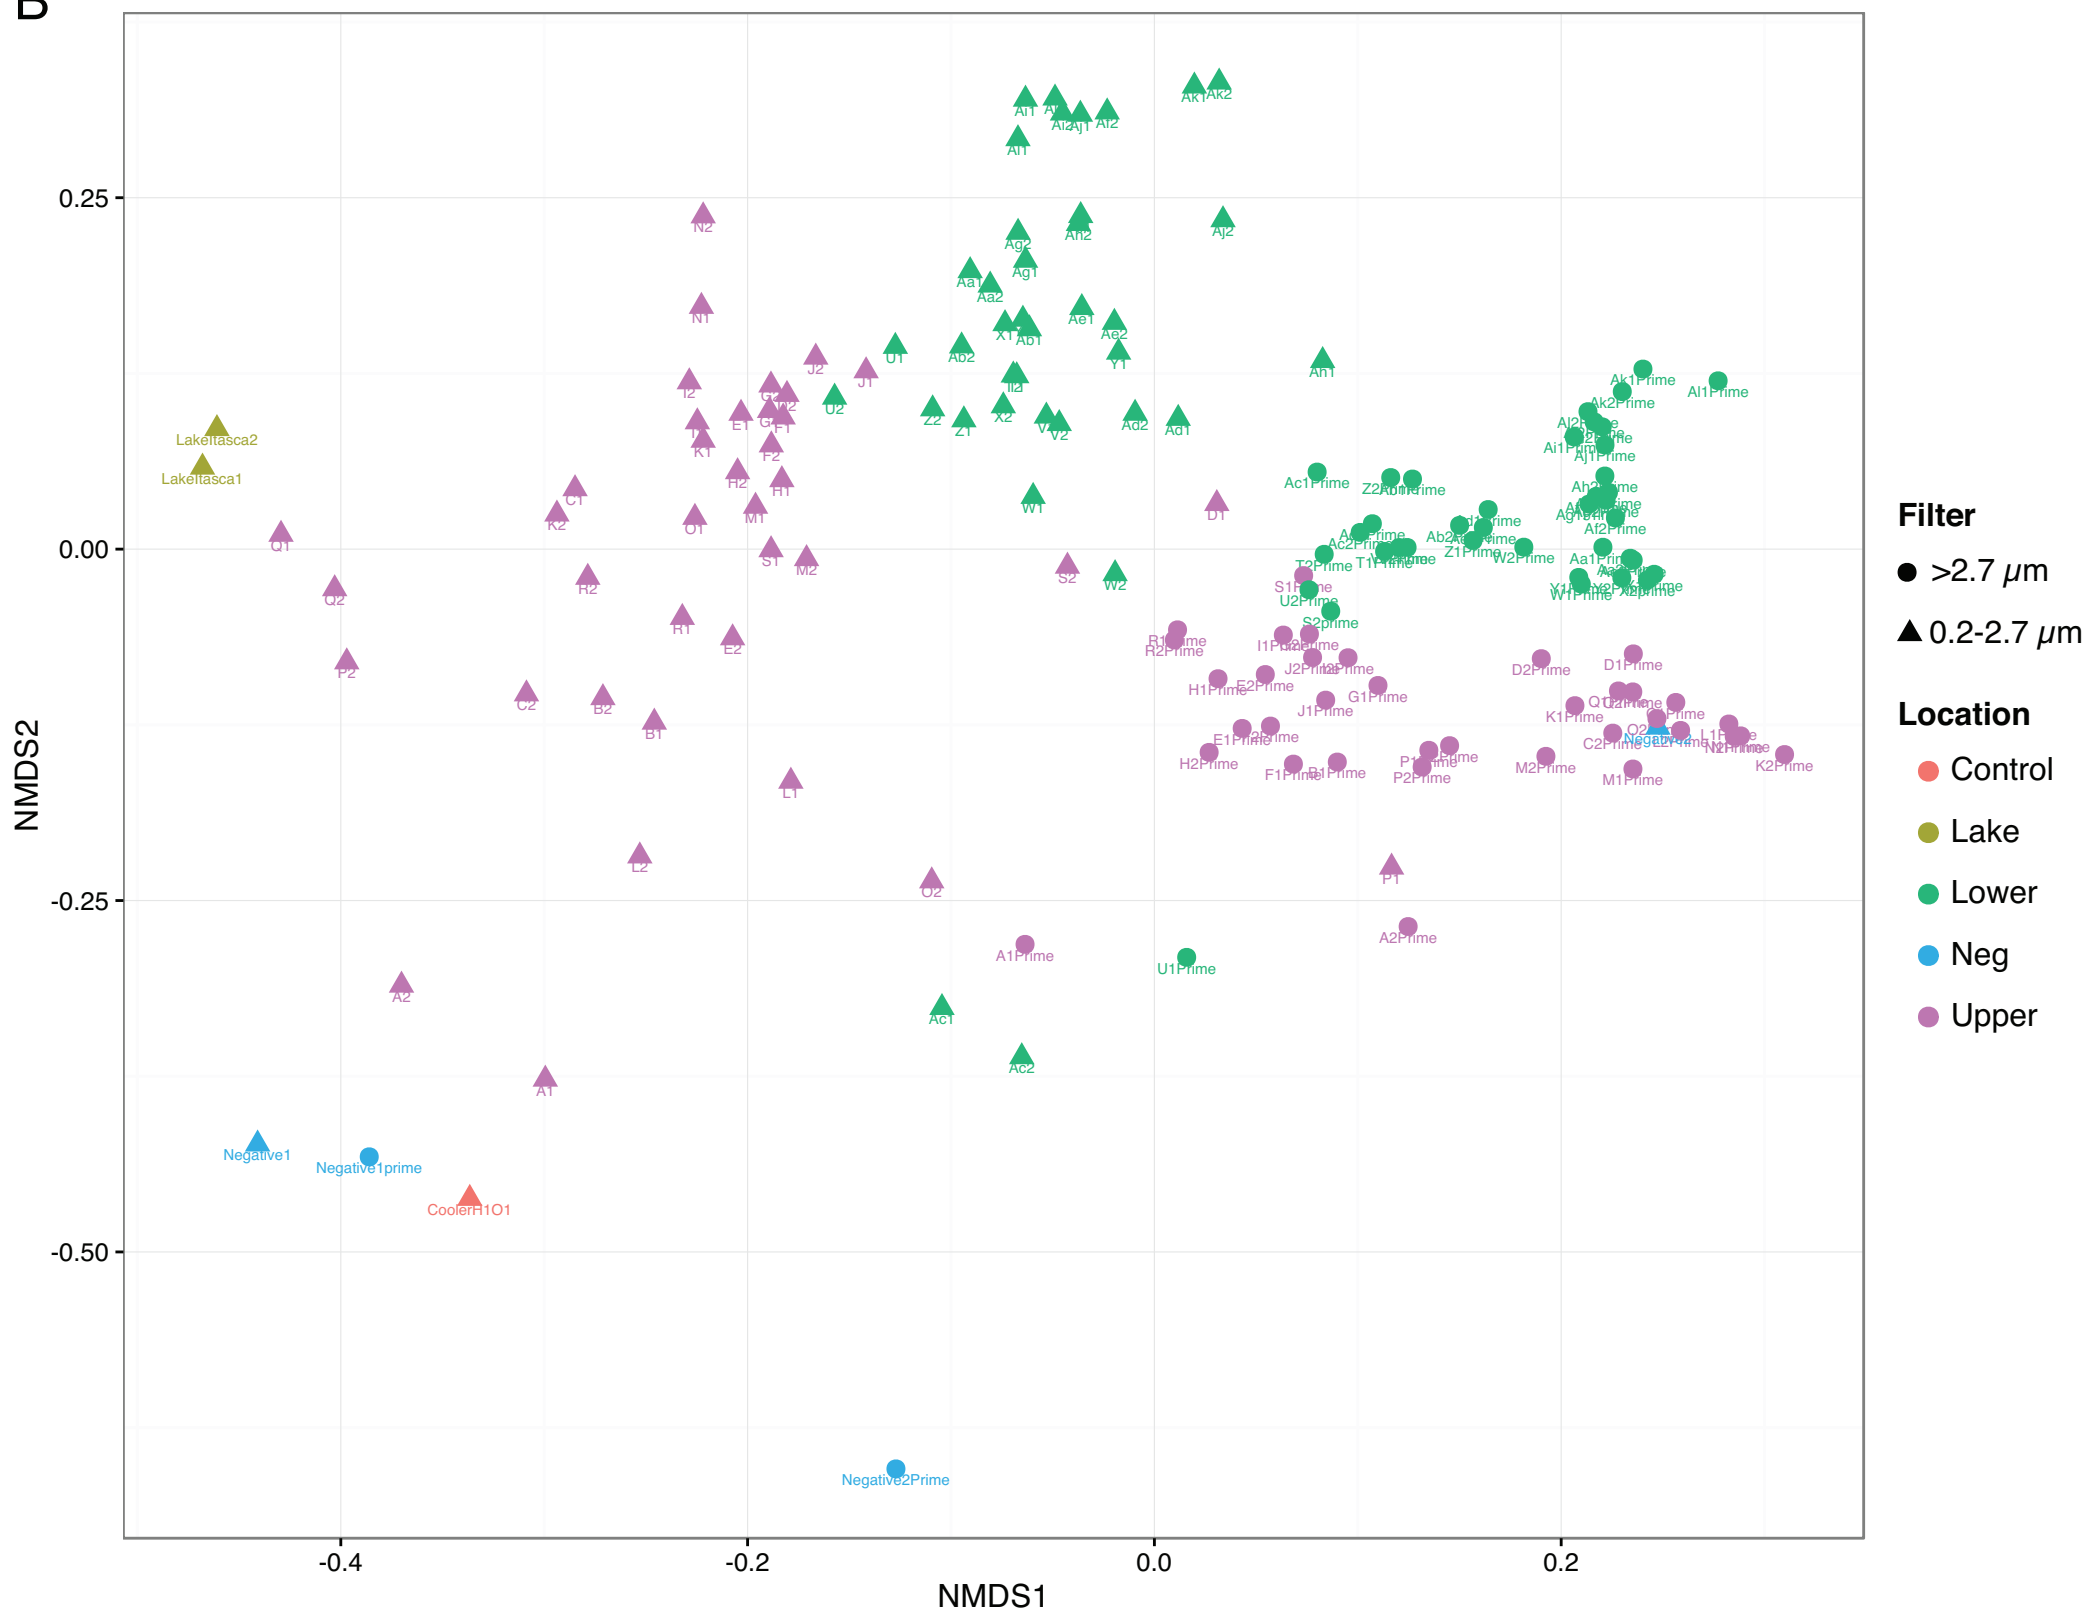

Figure S2 A

Height 0.0 0.2 0.4 0.6 0.8 1.0

β

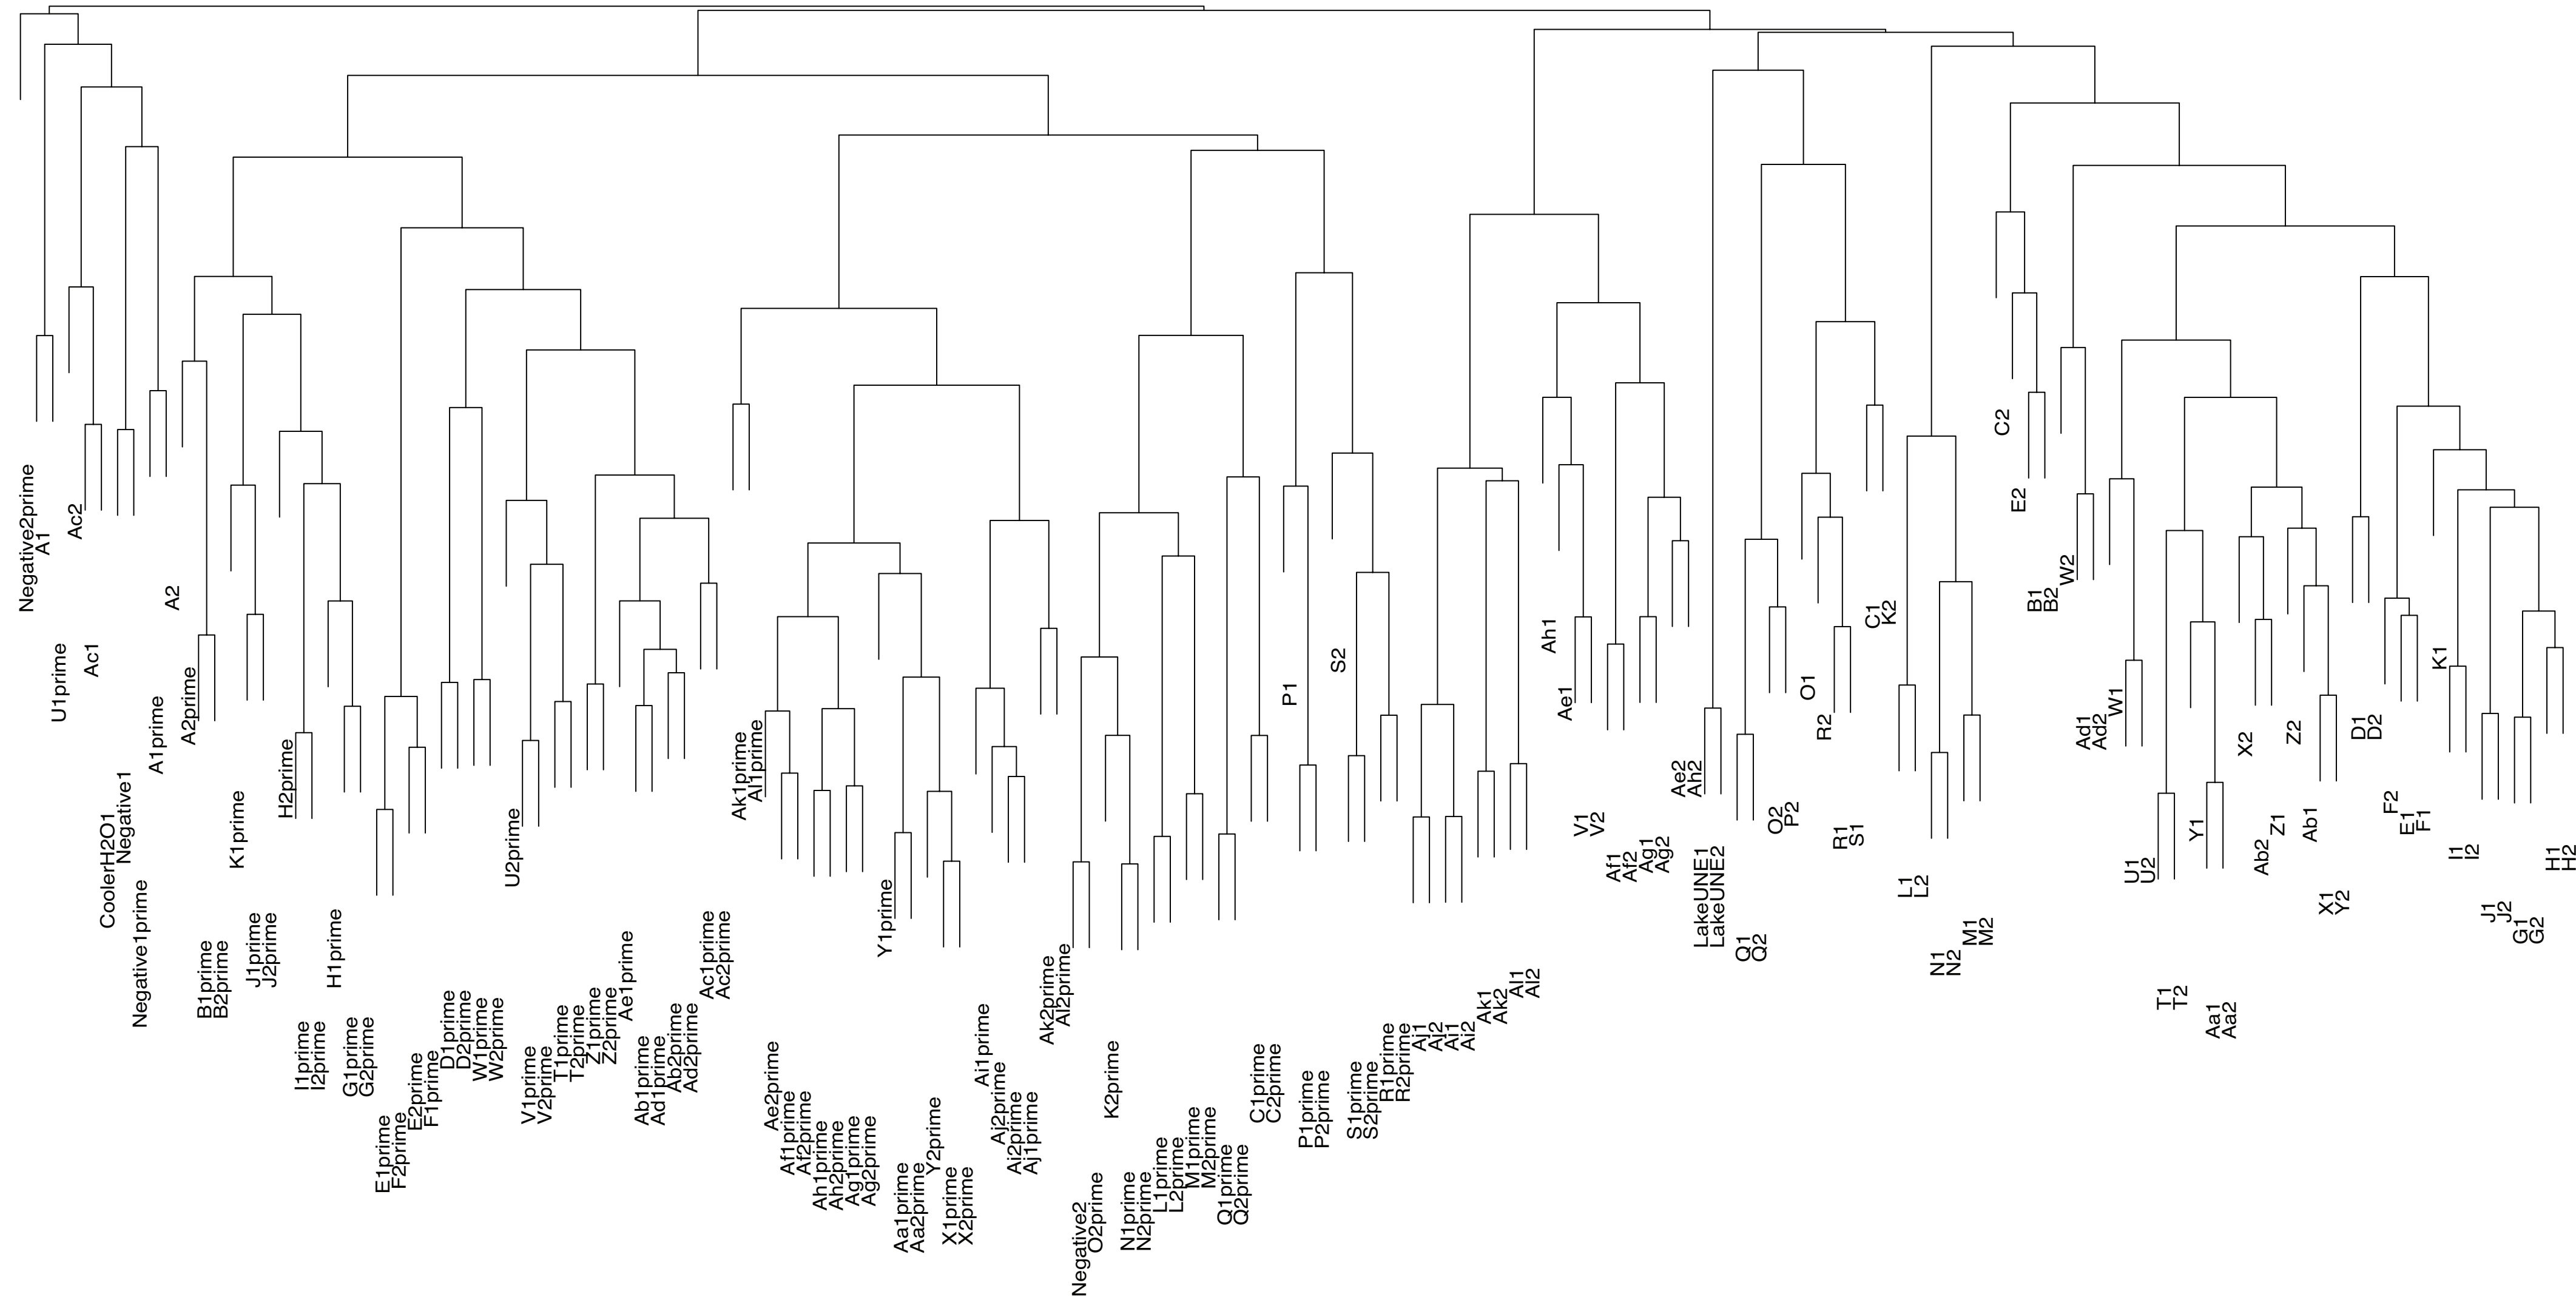

Height 0.0 0.2 0.4 0.6 0.8

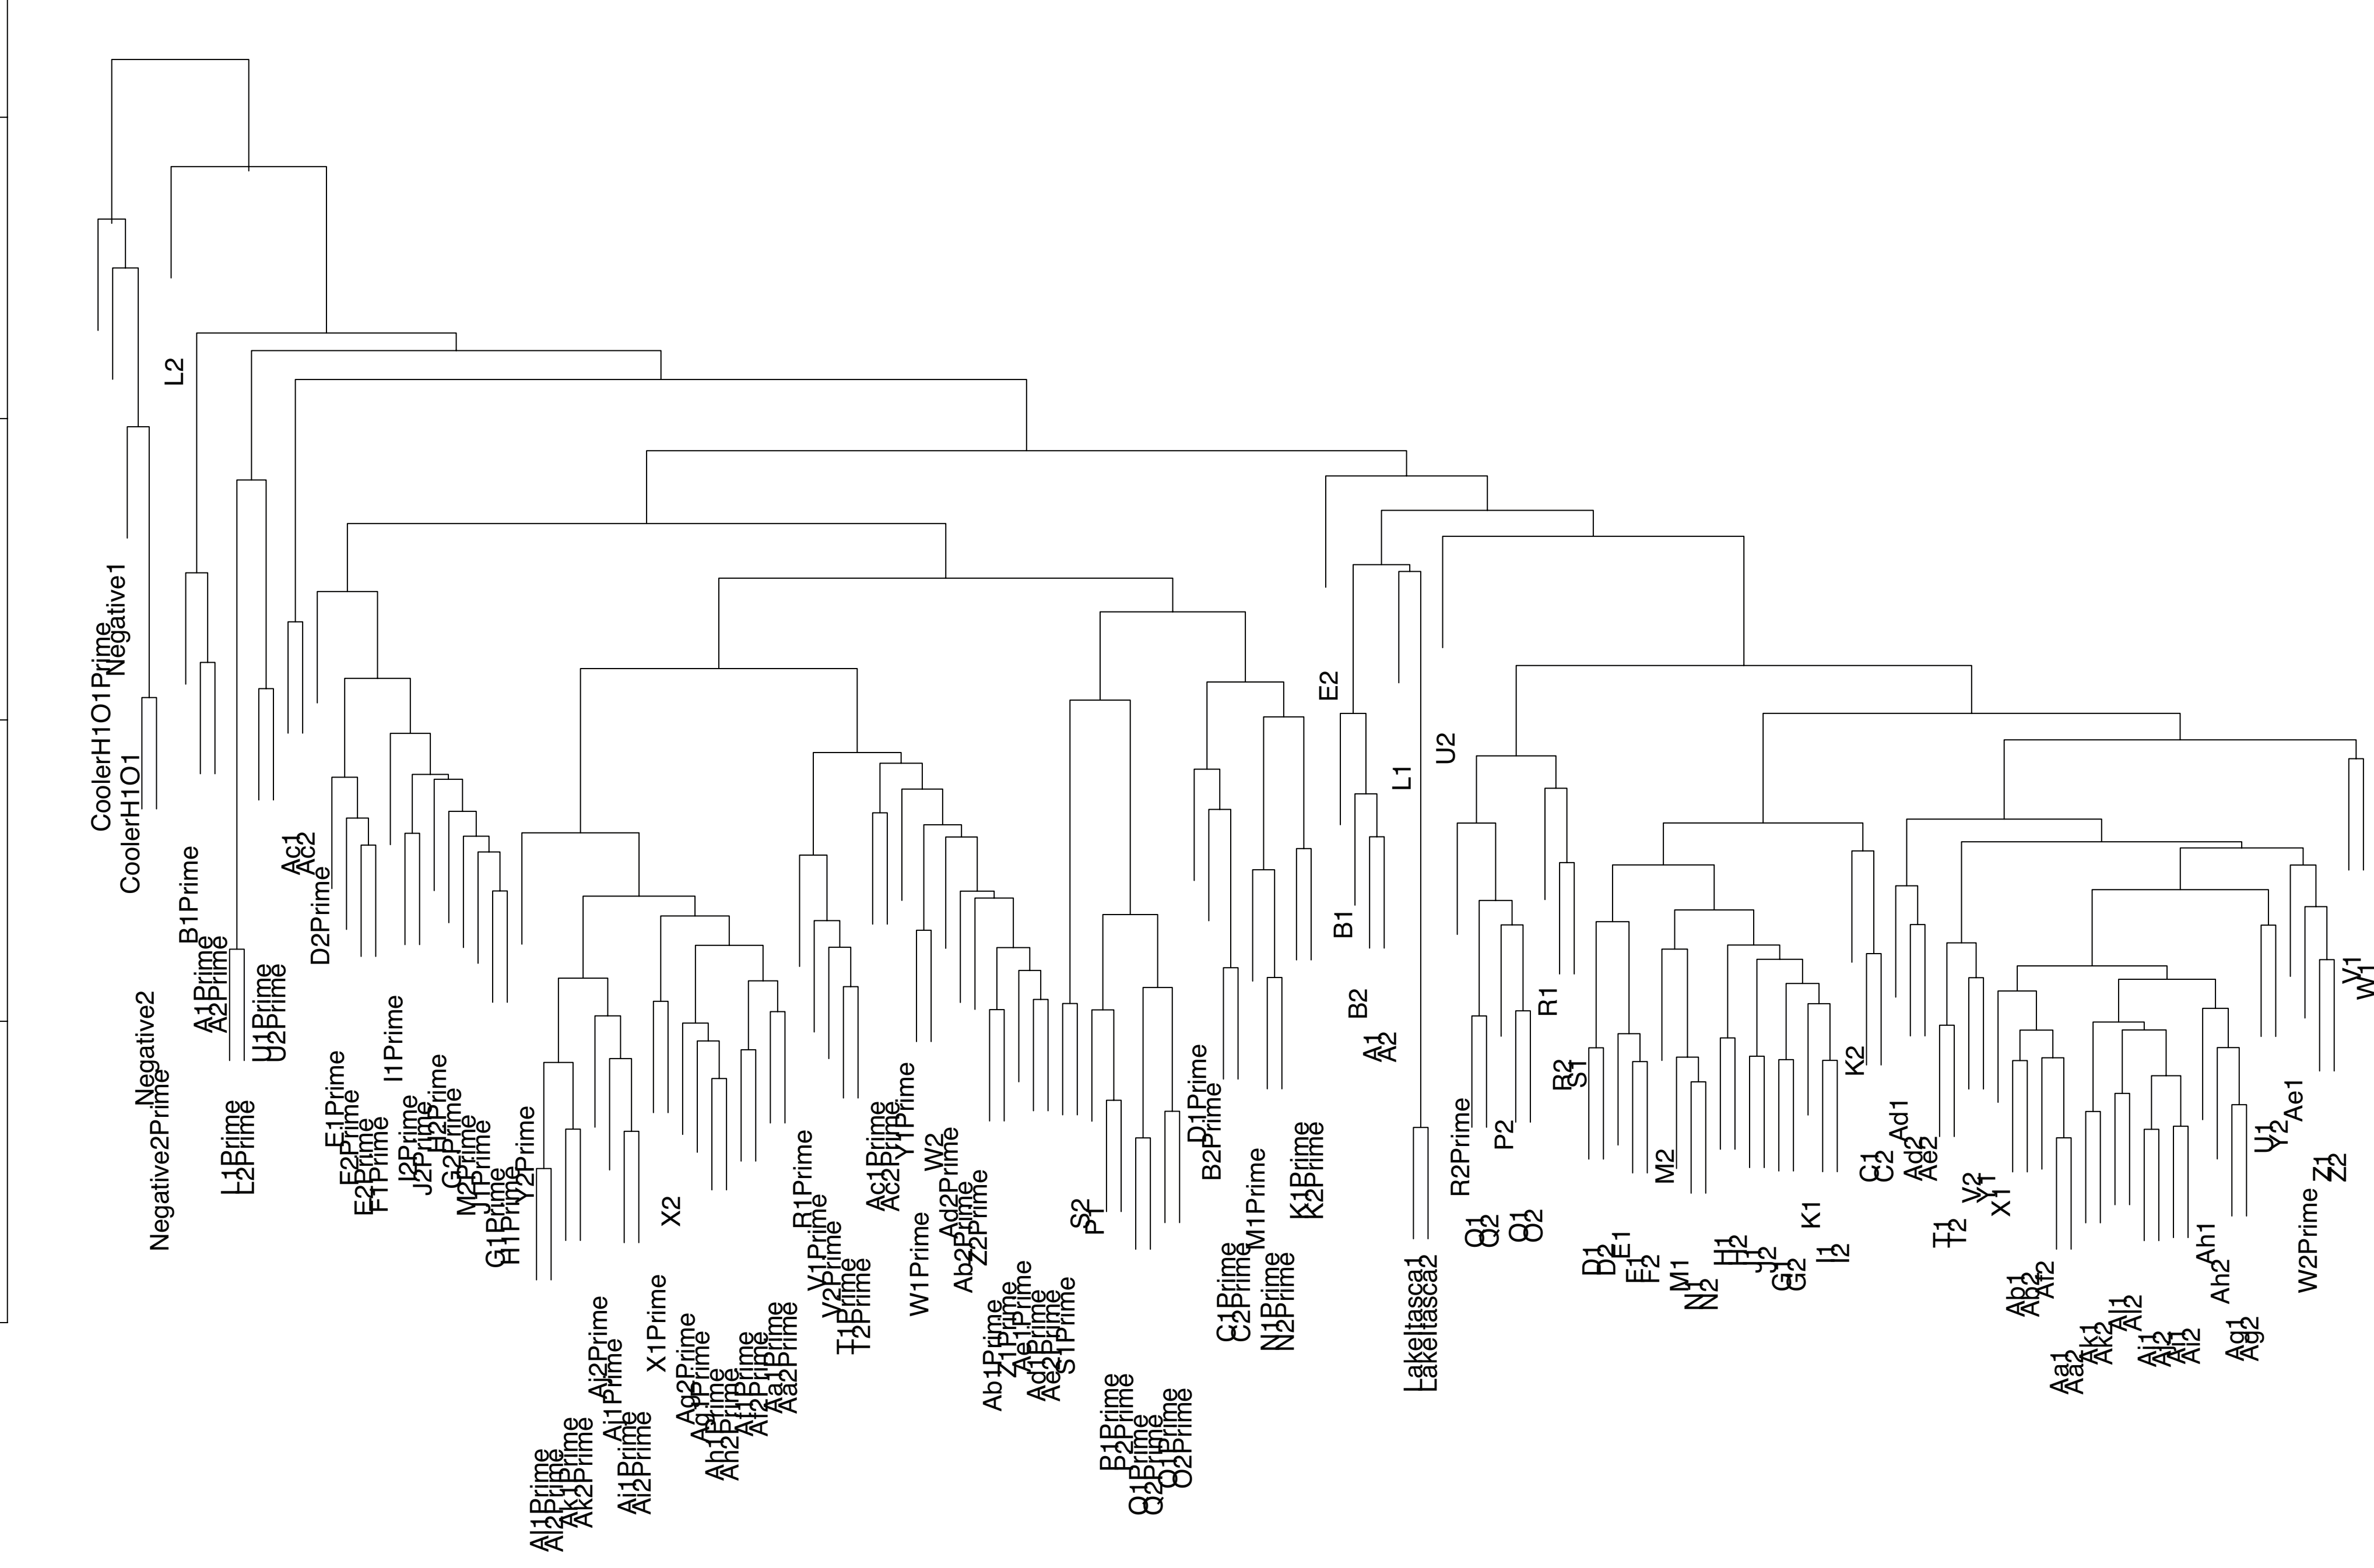

Figure S3

A

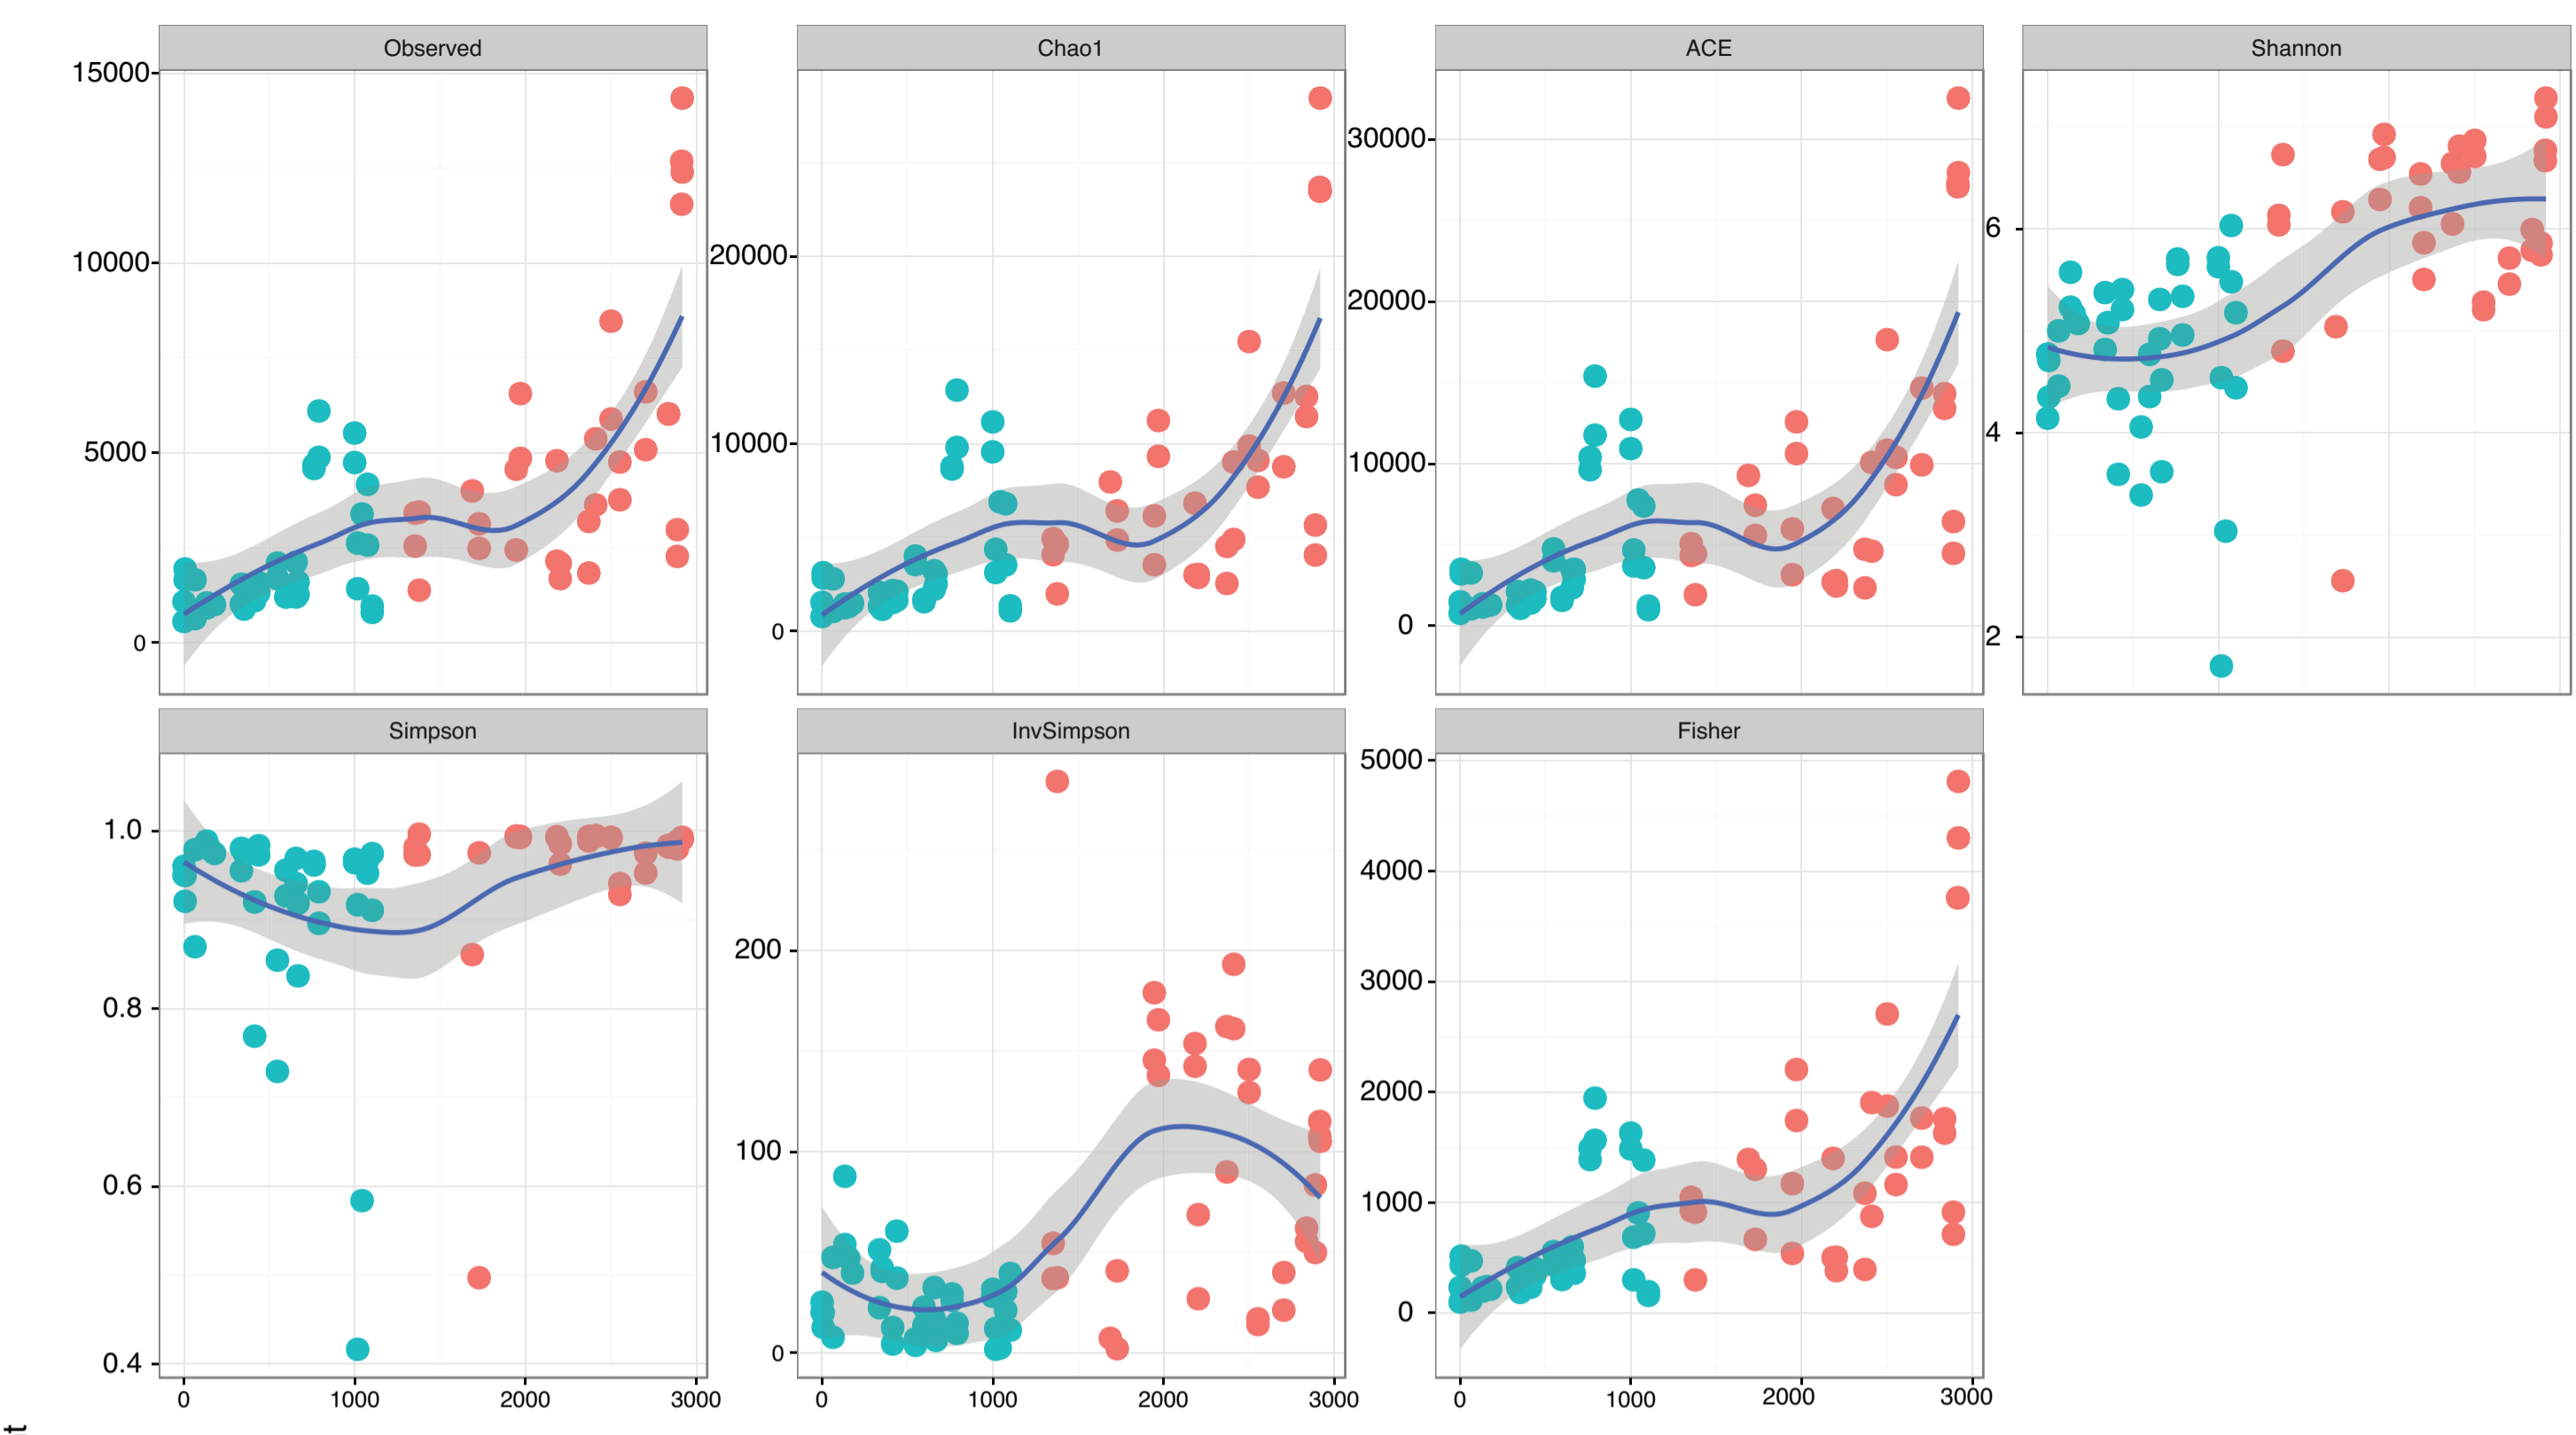

B

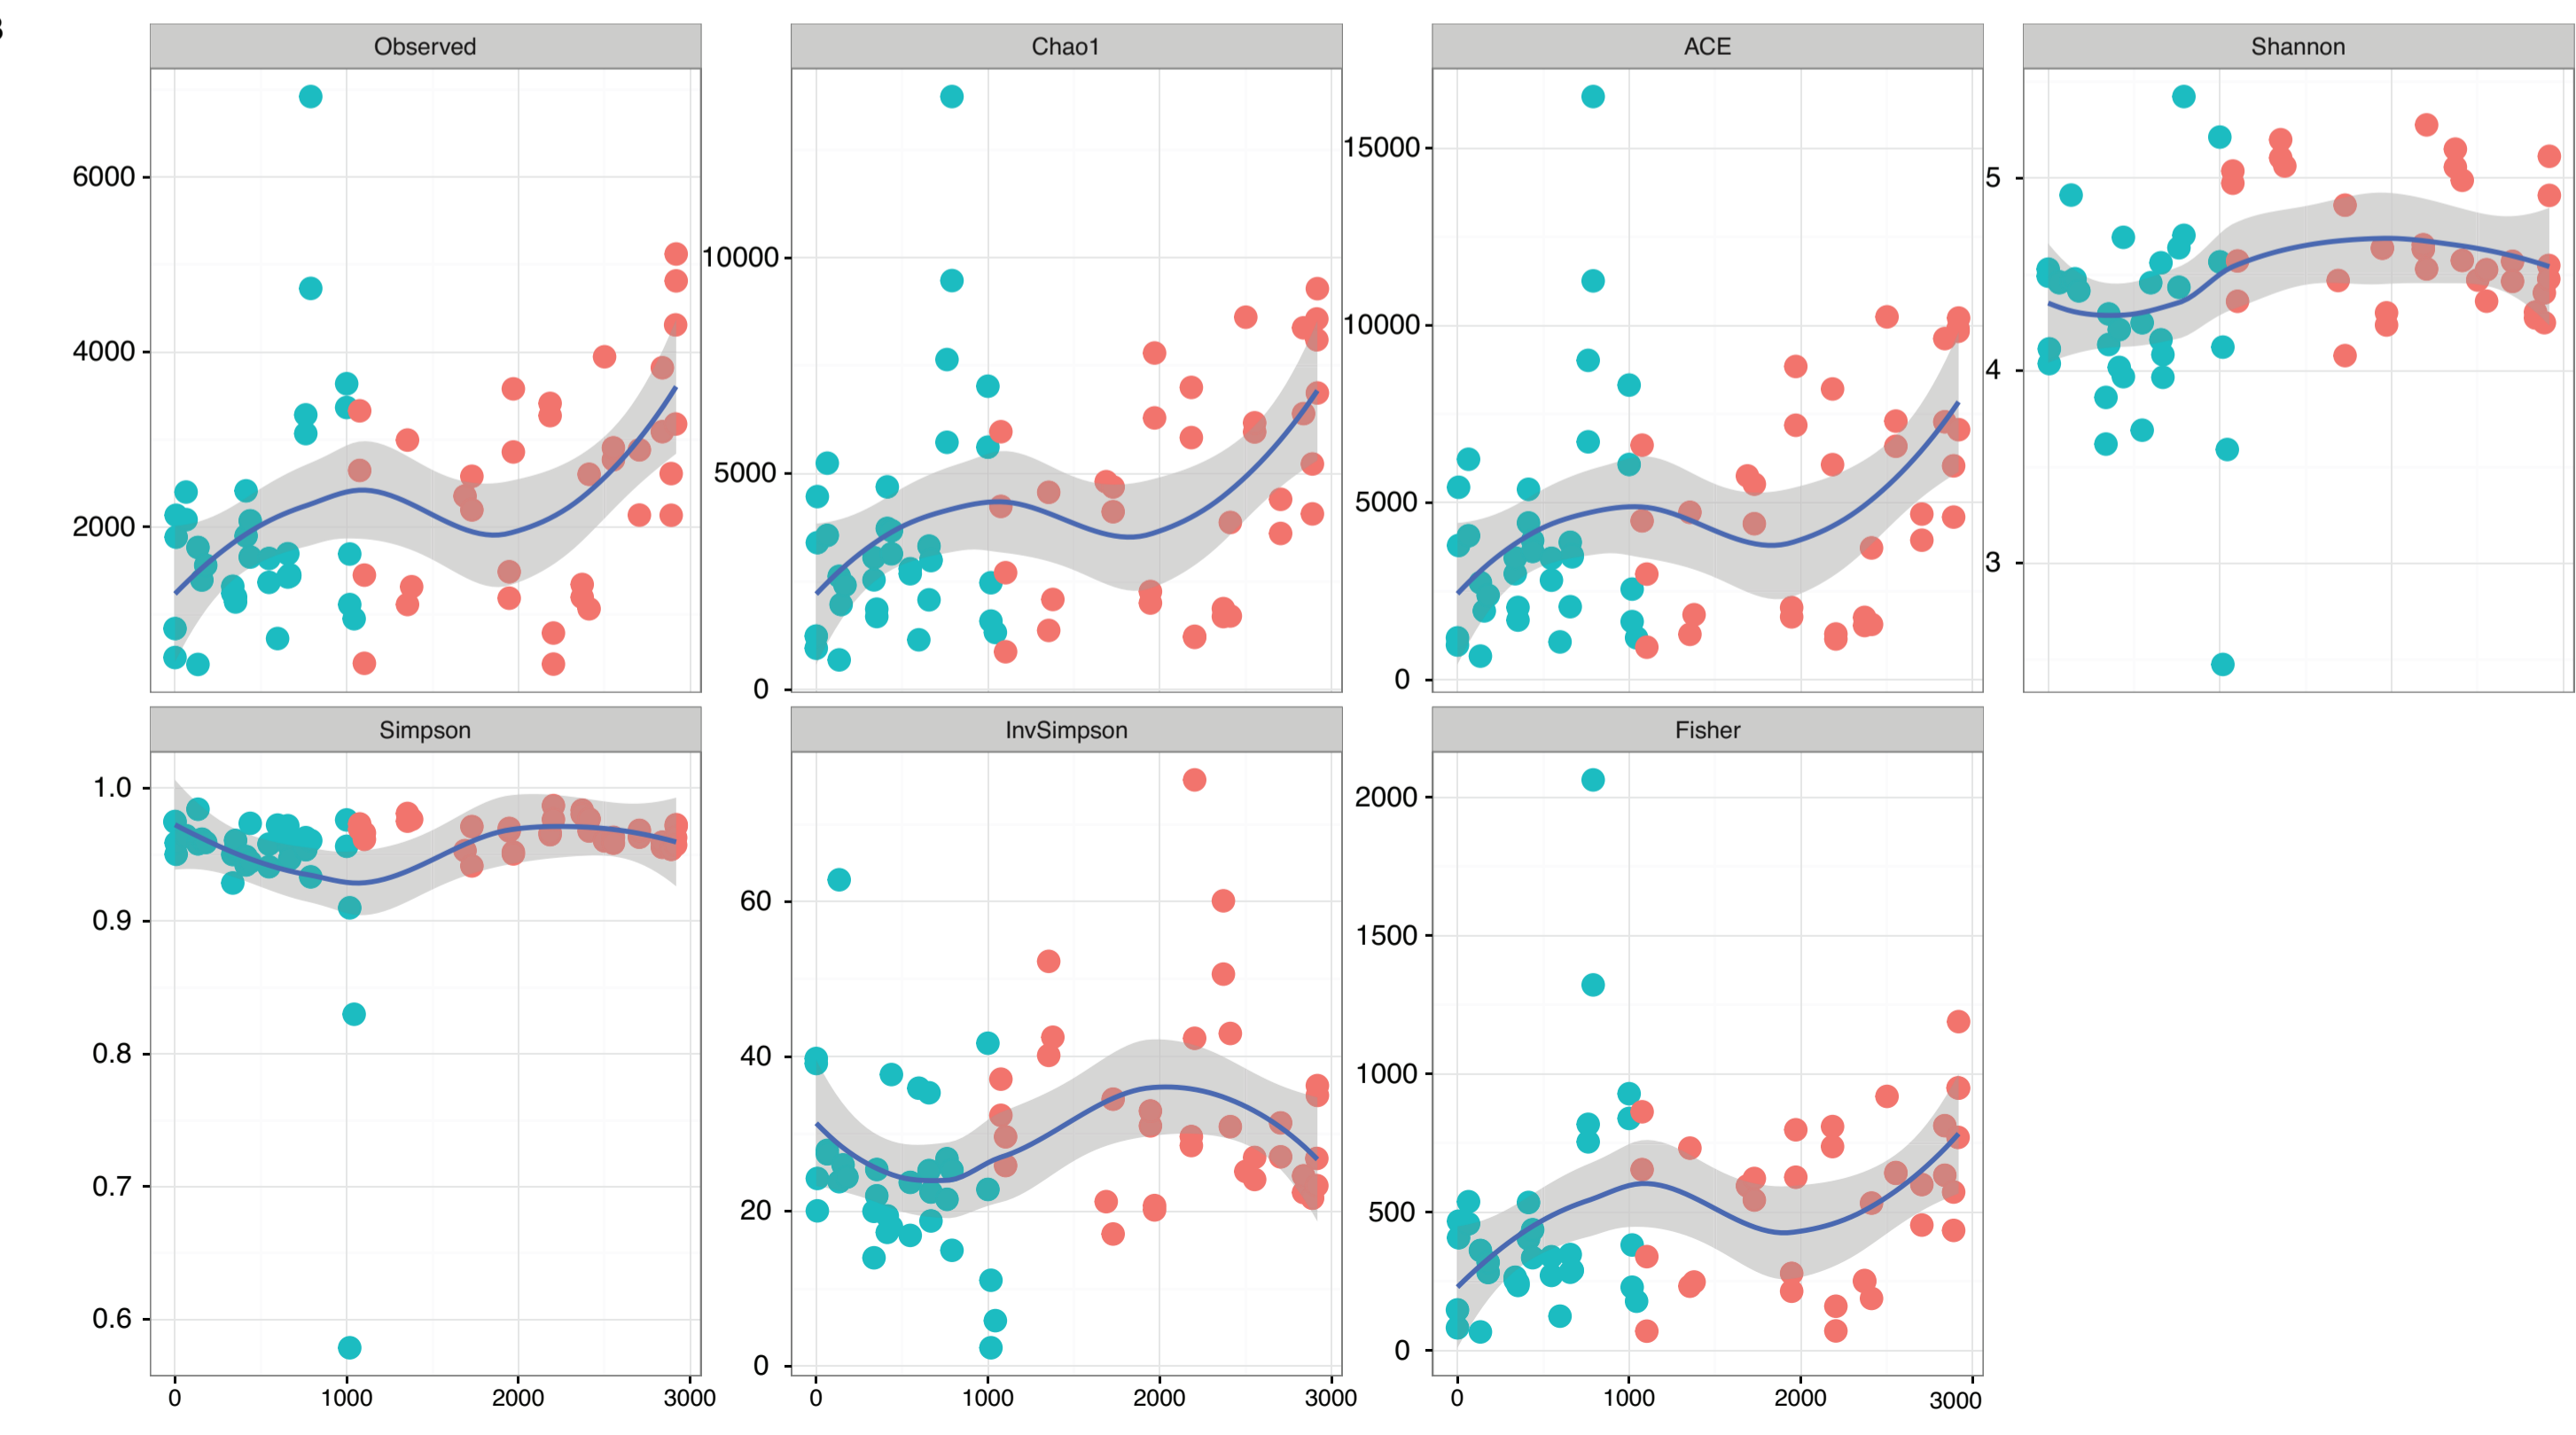

C

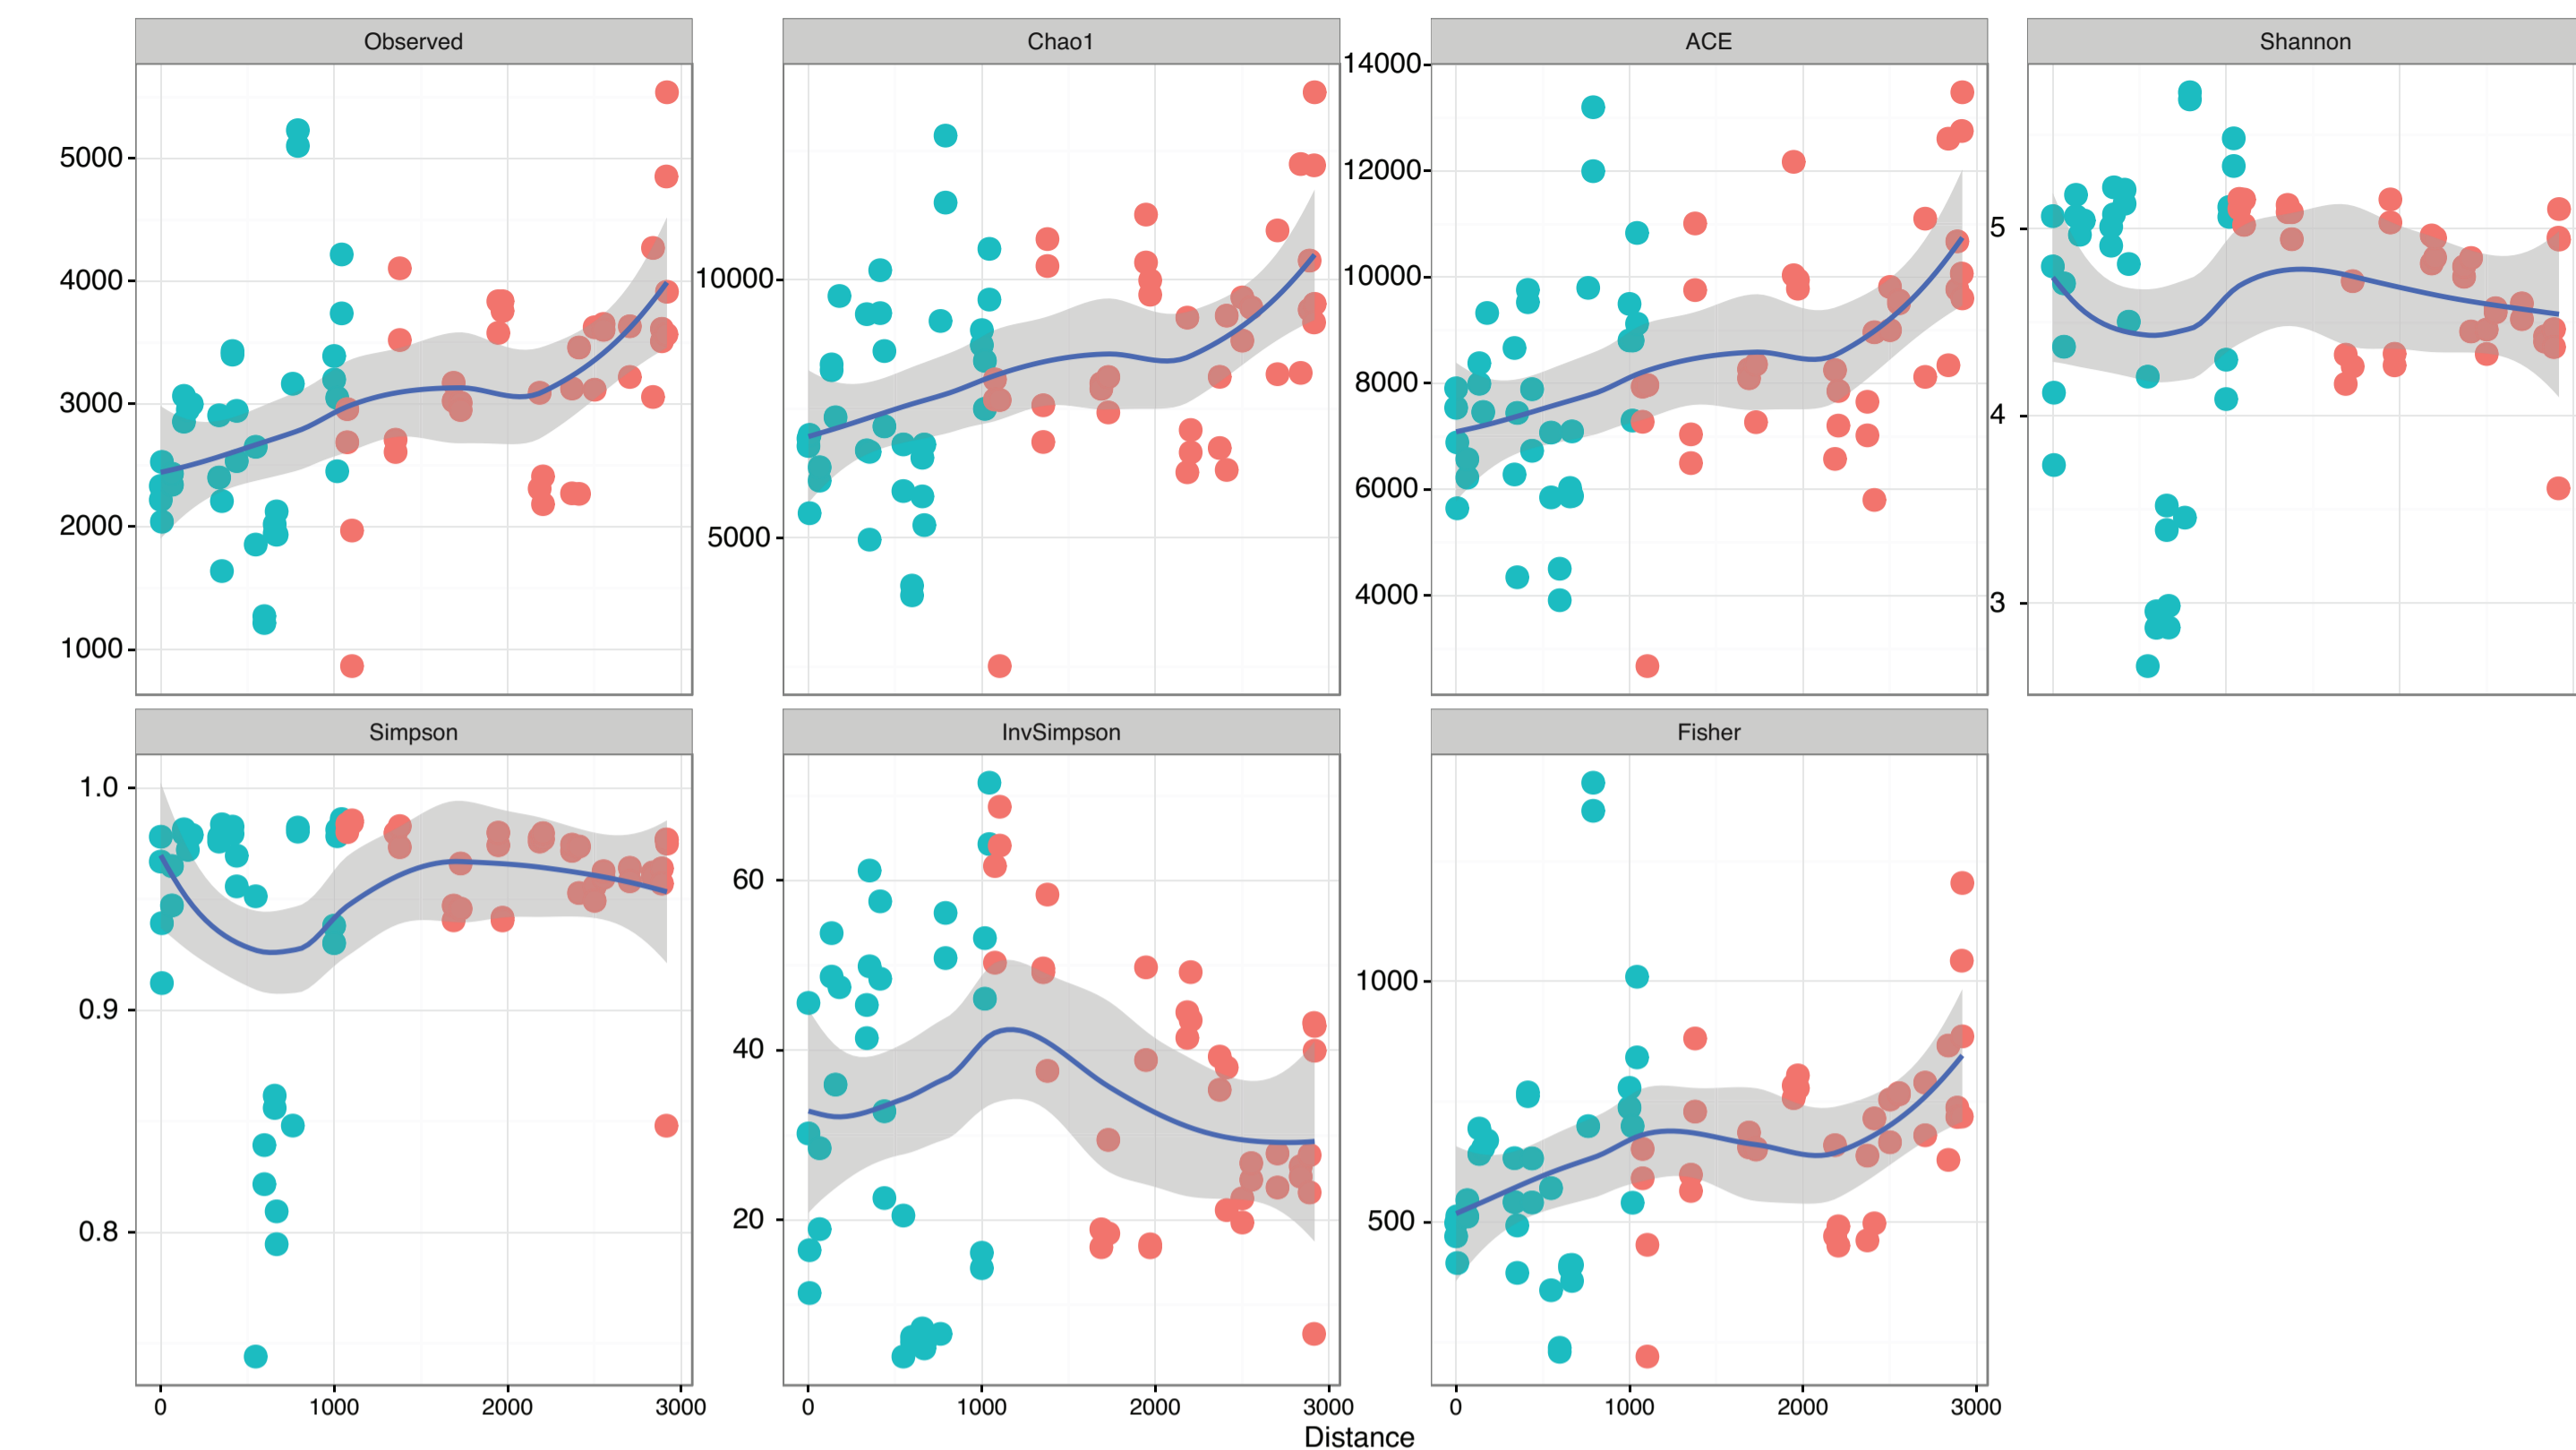

D

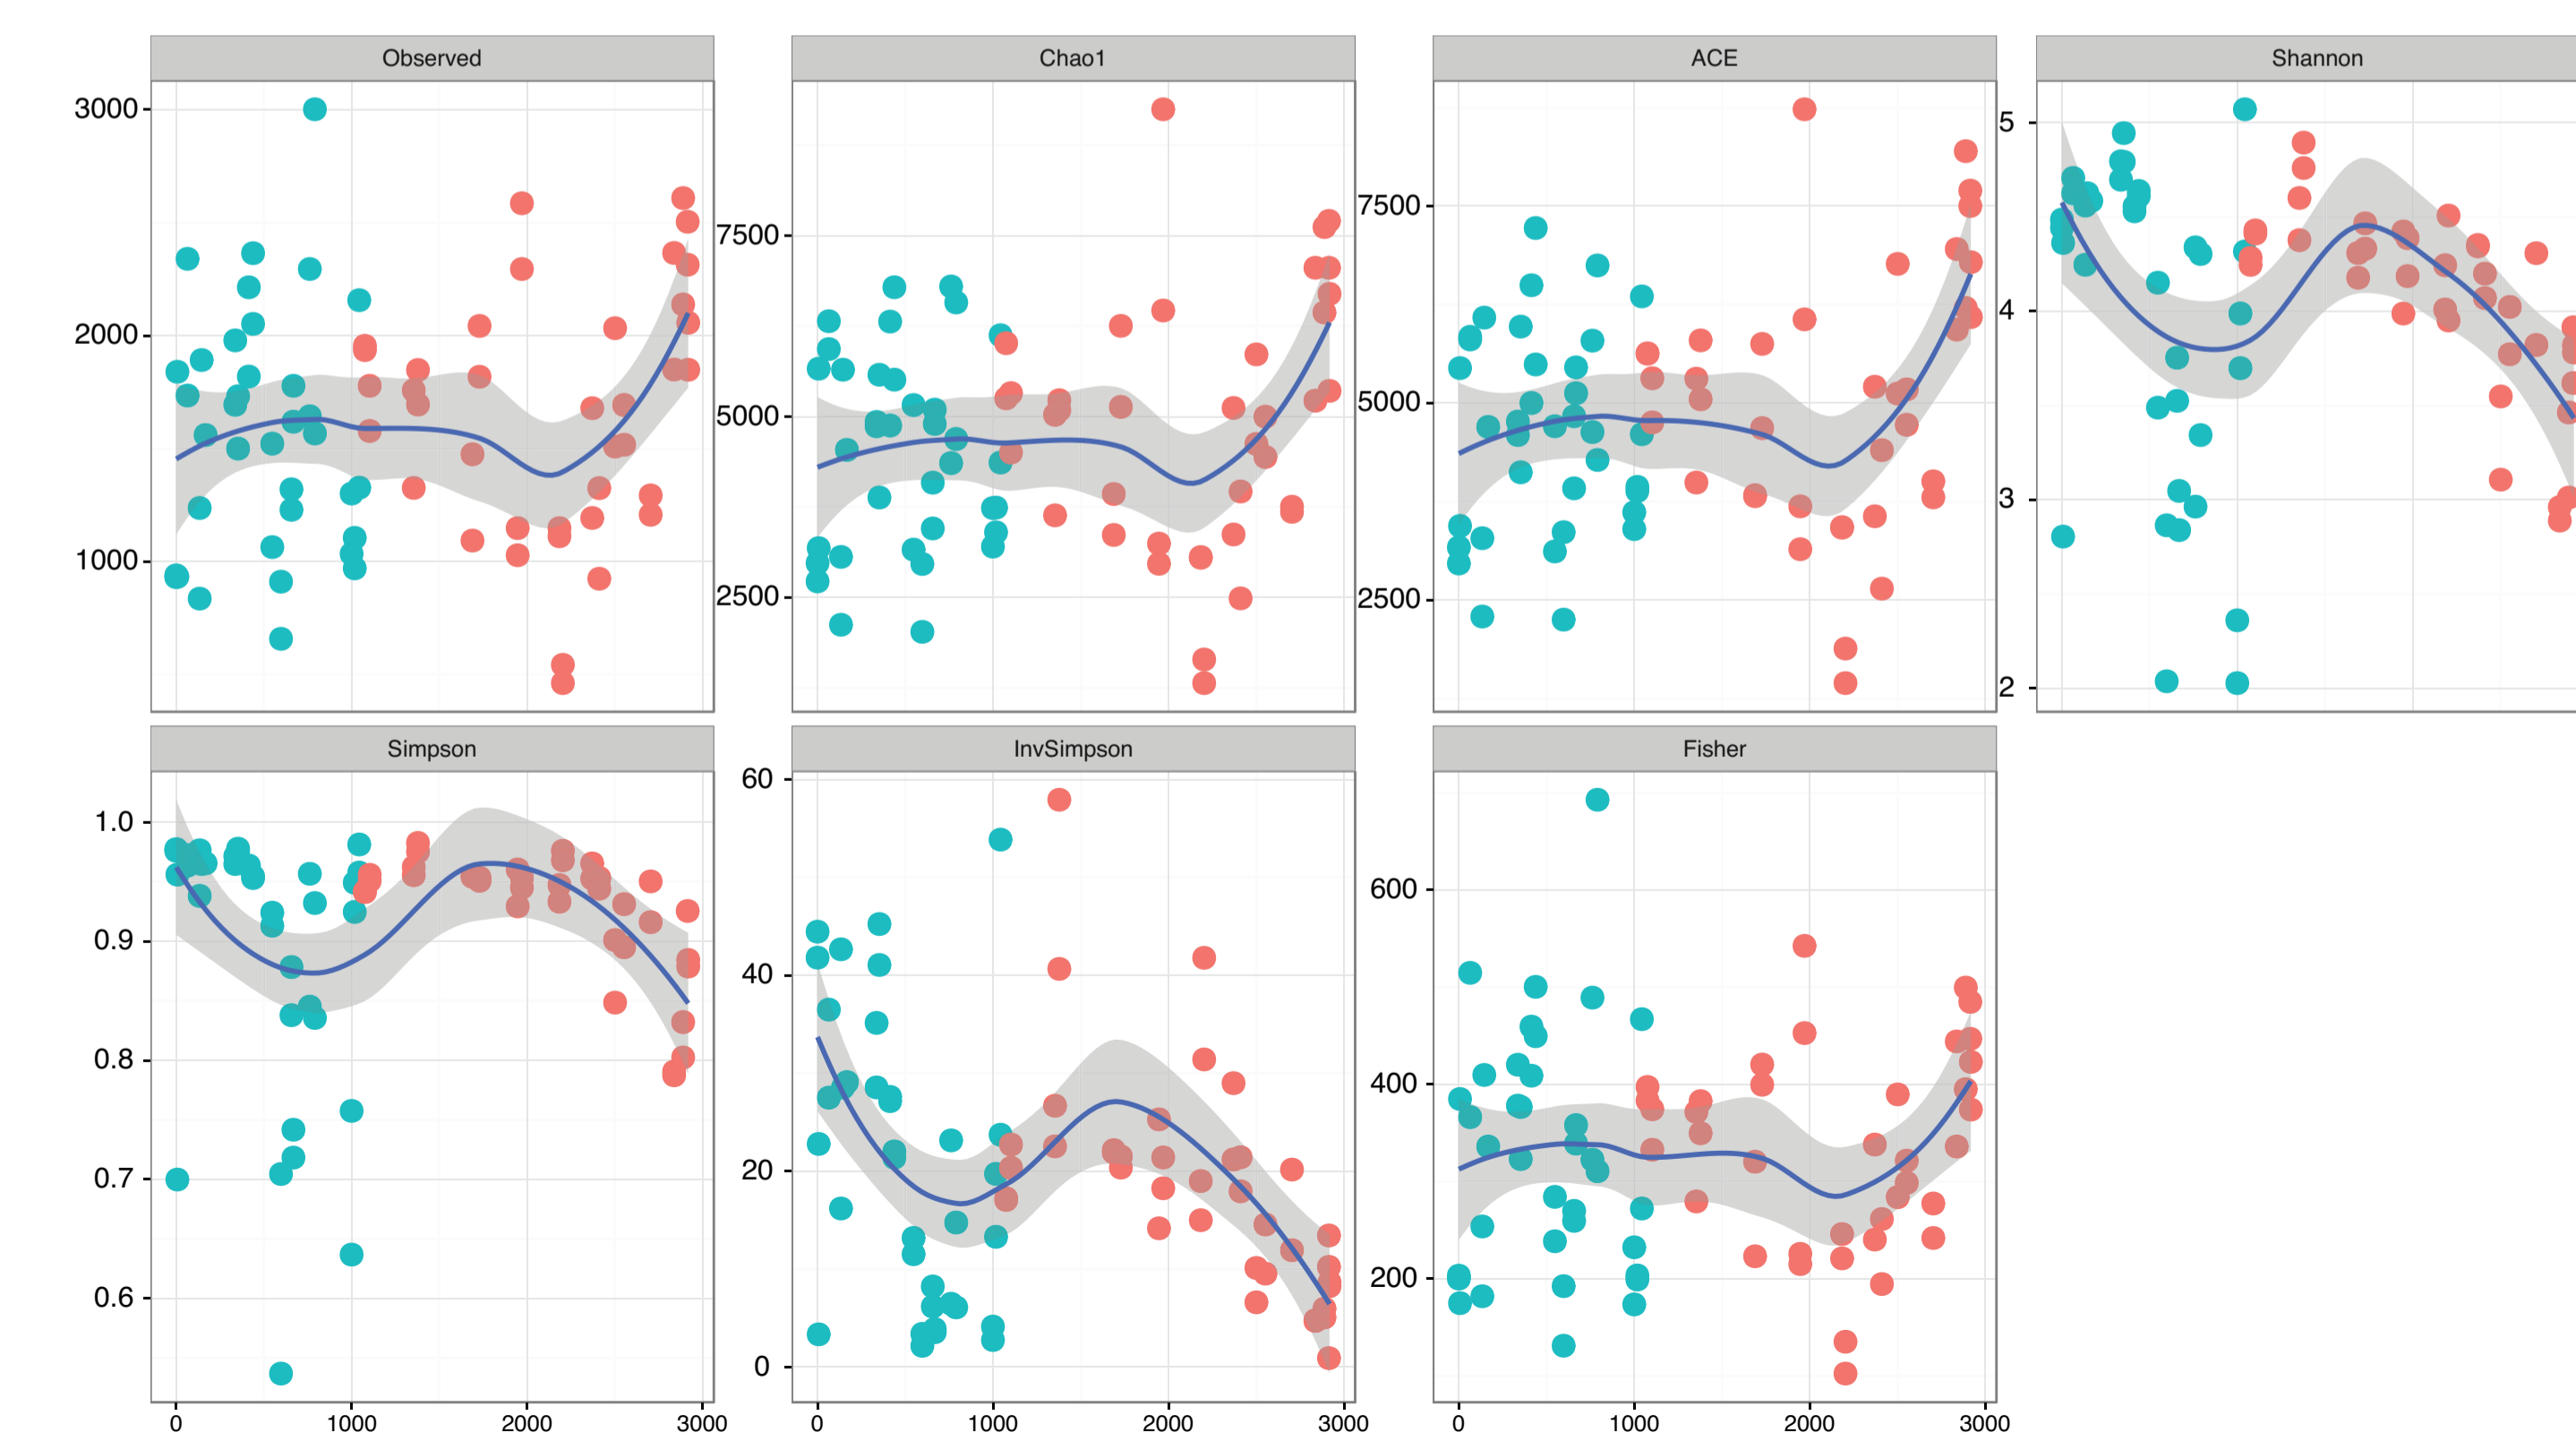

Distance

Figure S4

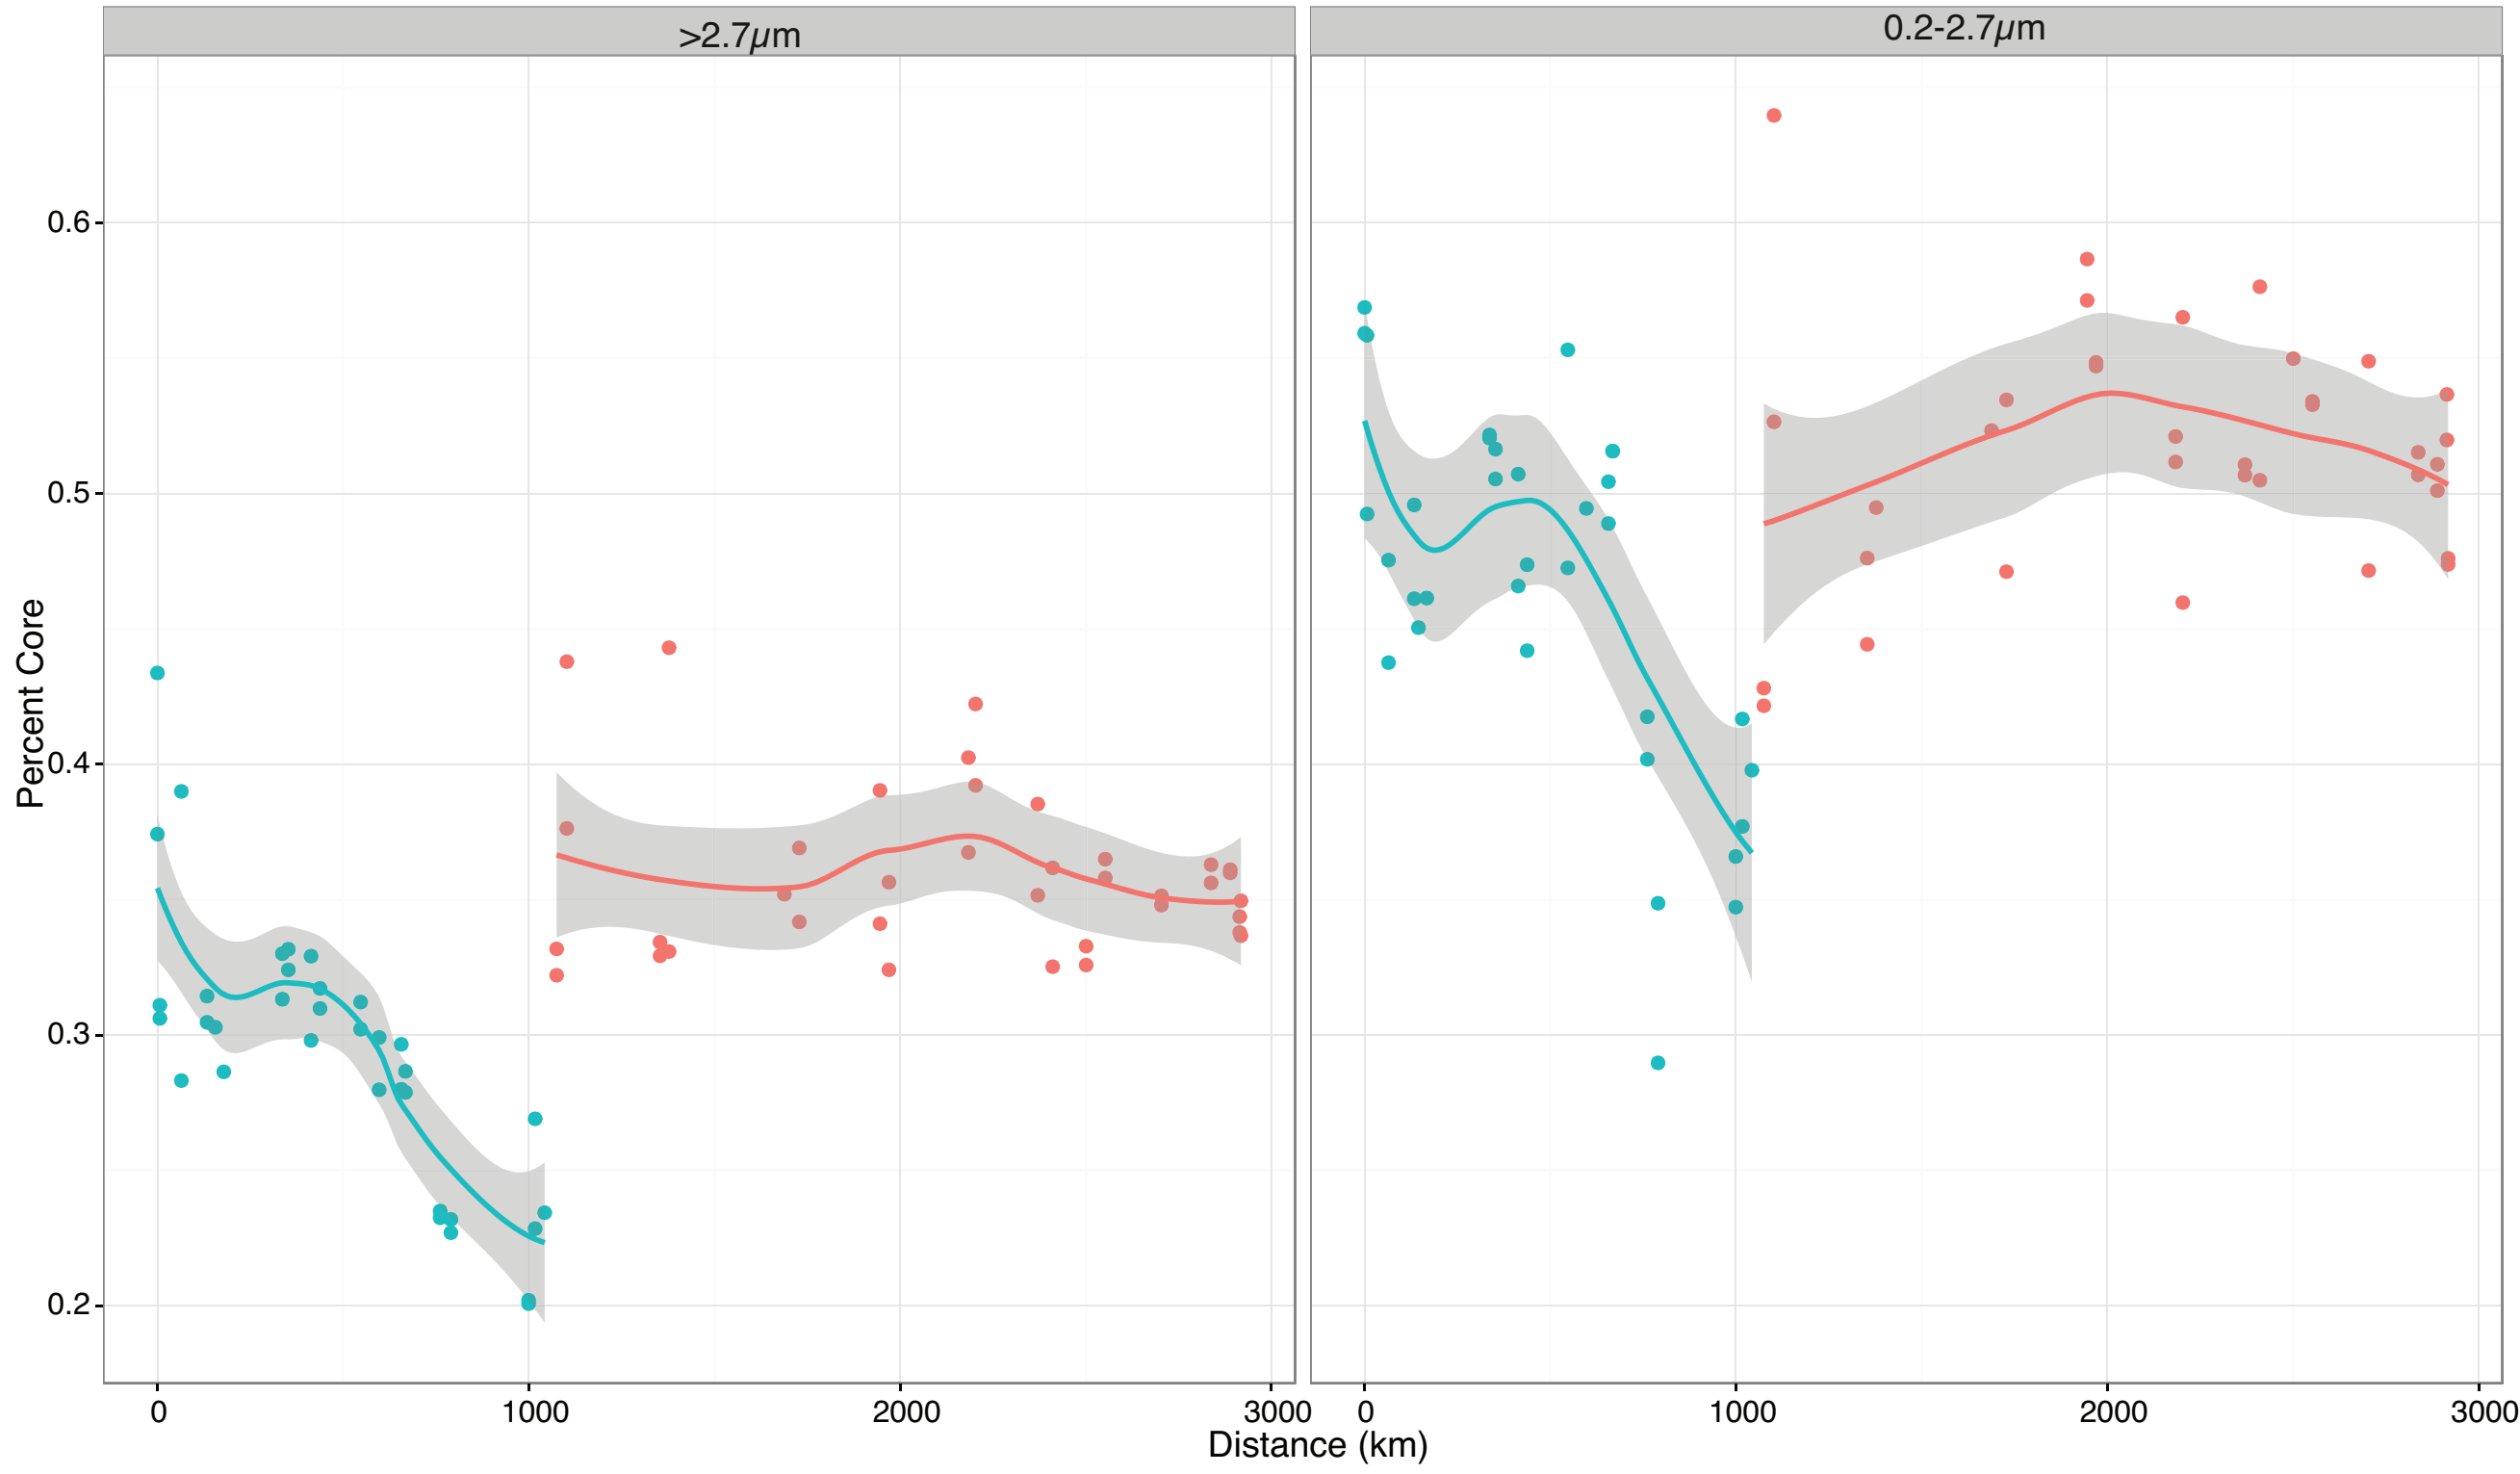

Figure S5 A

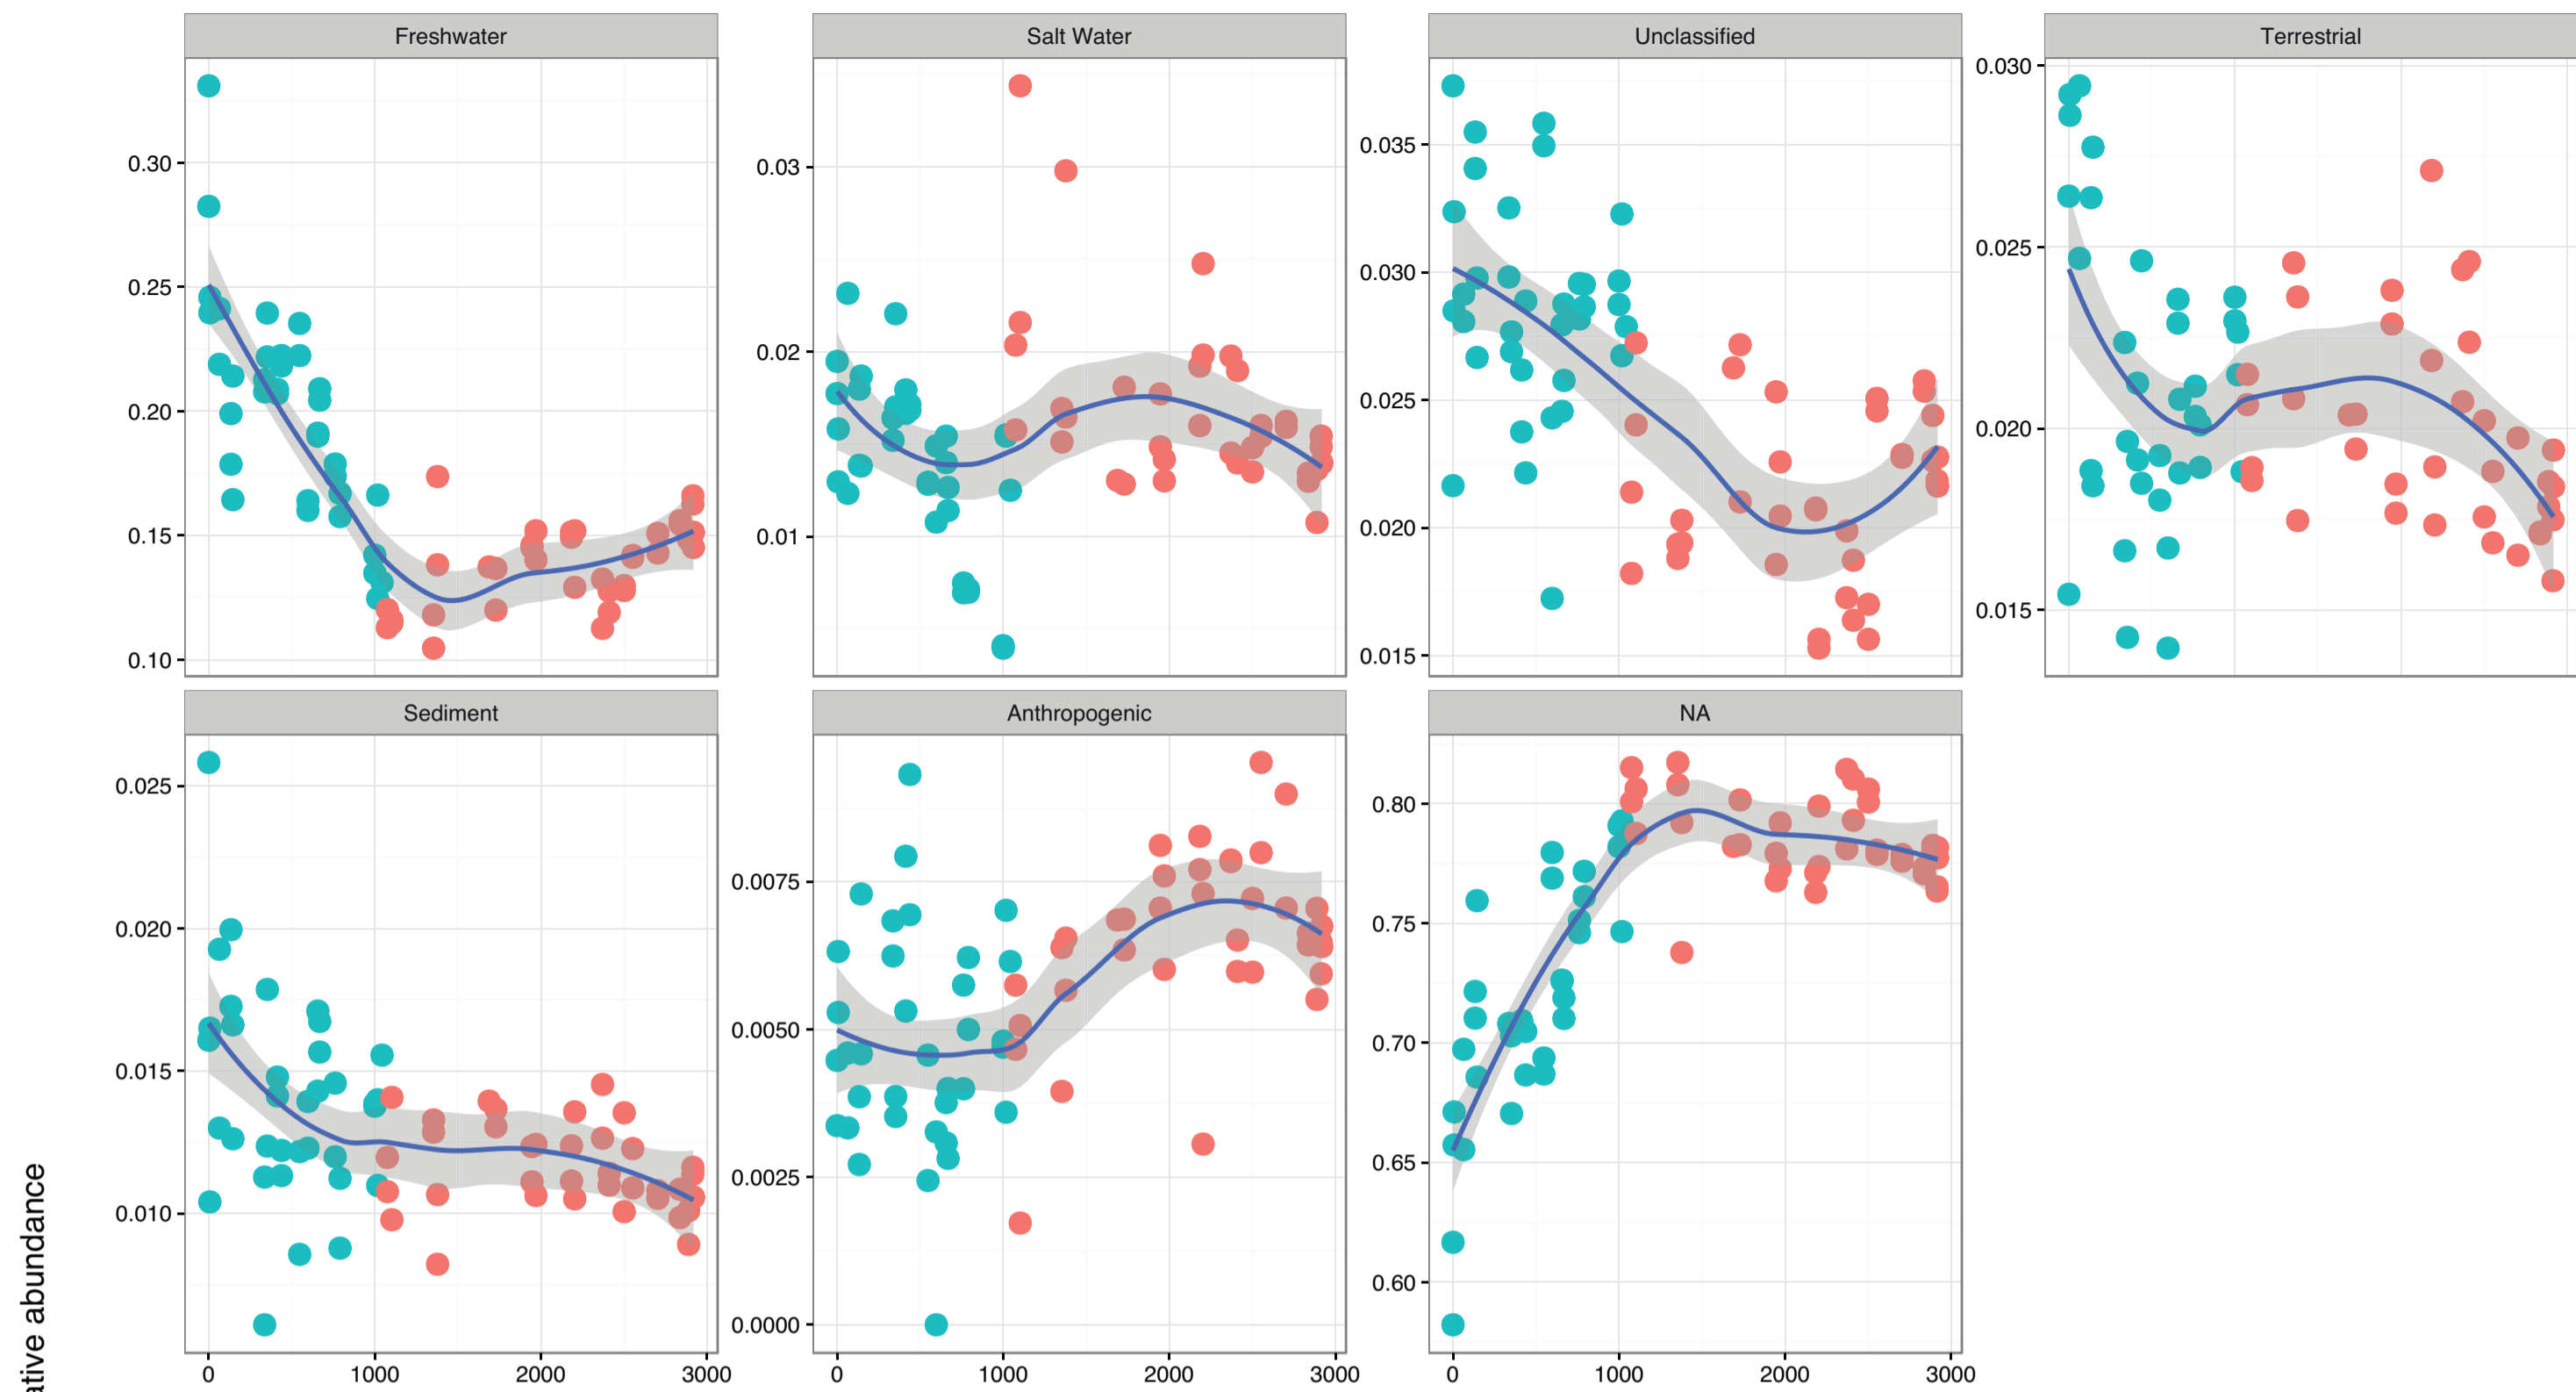

B

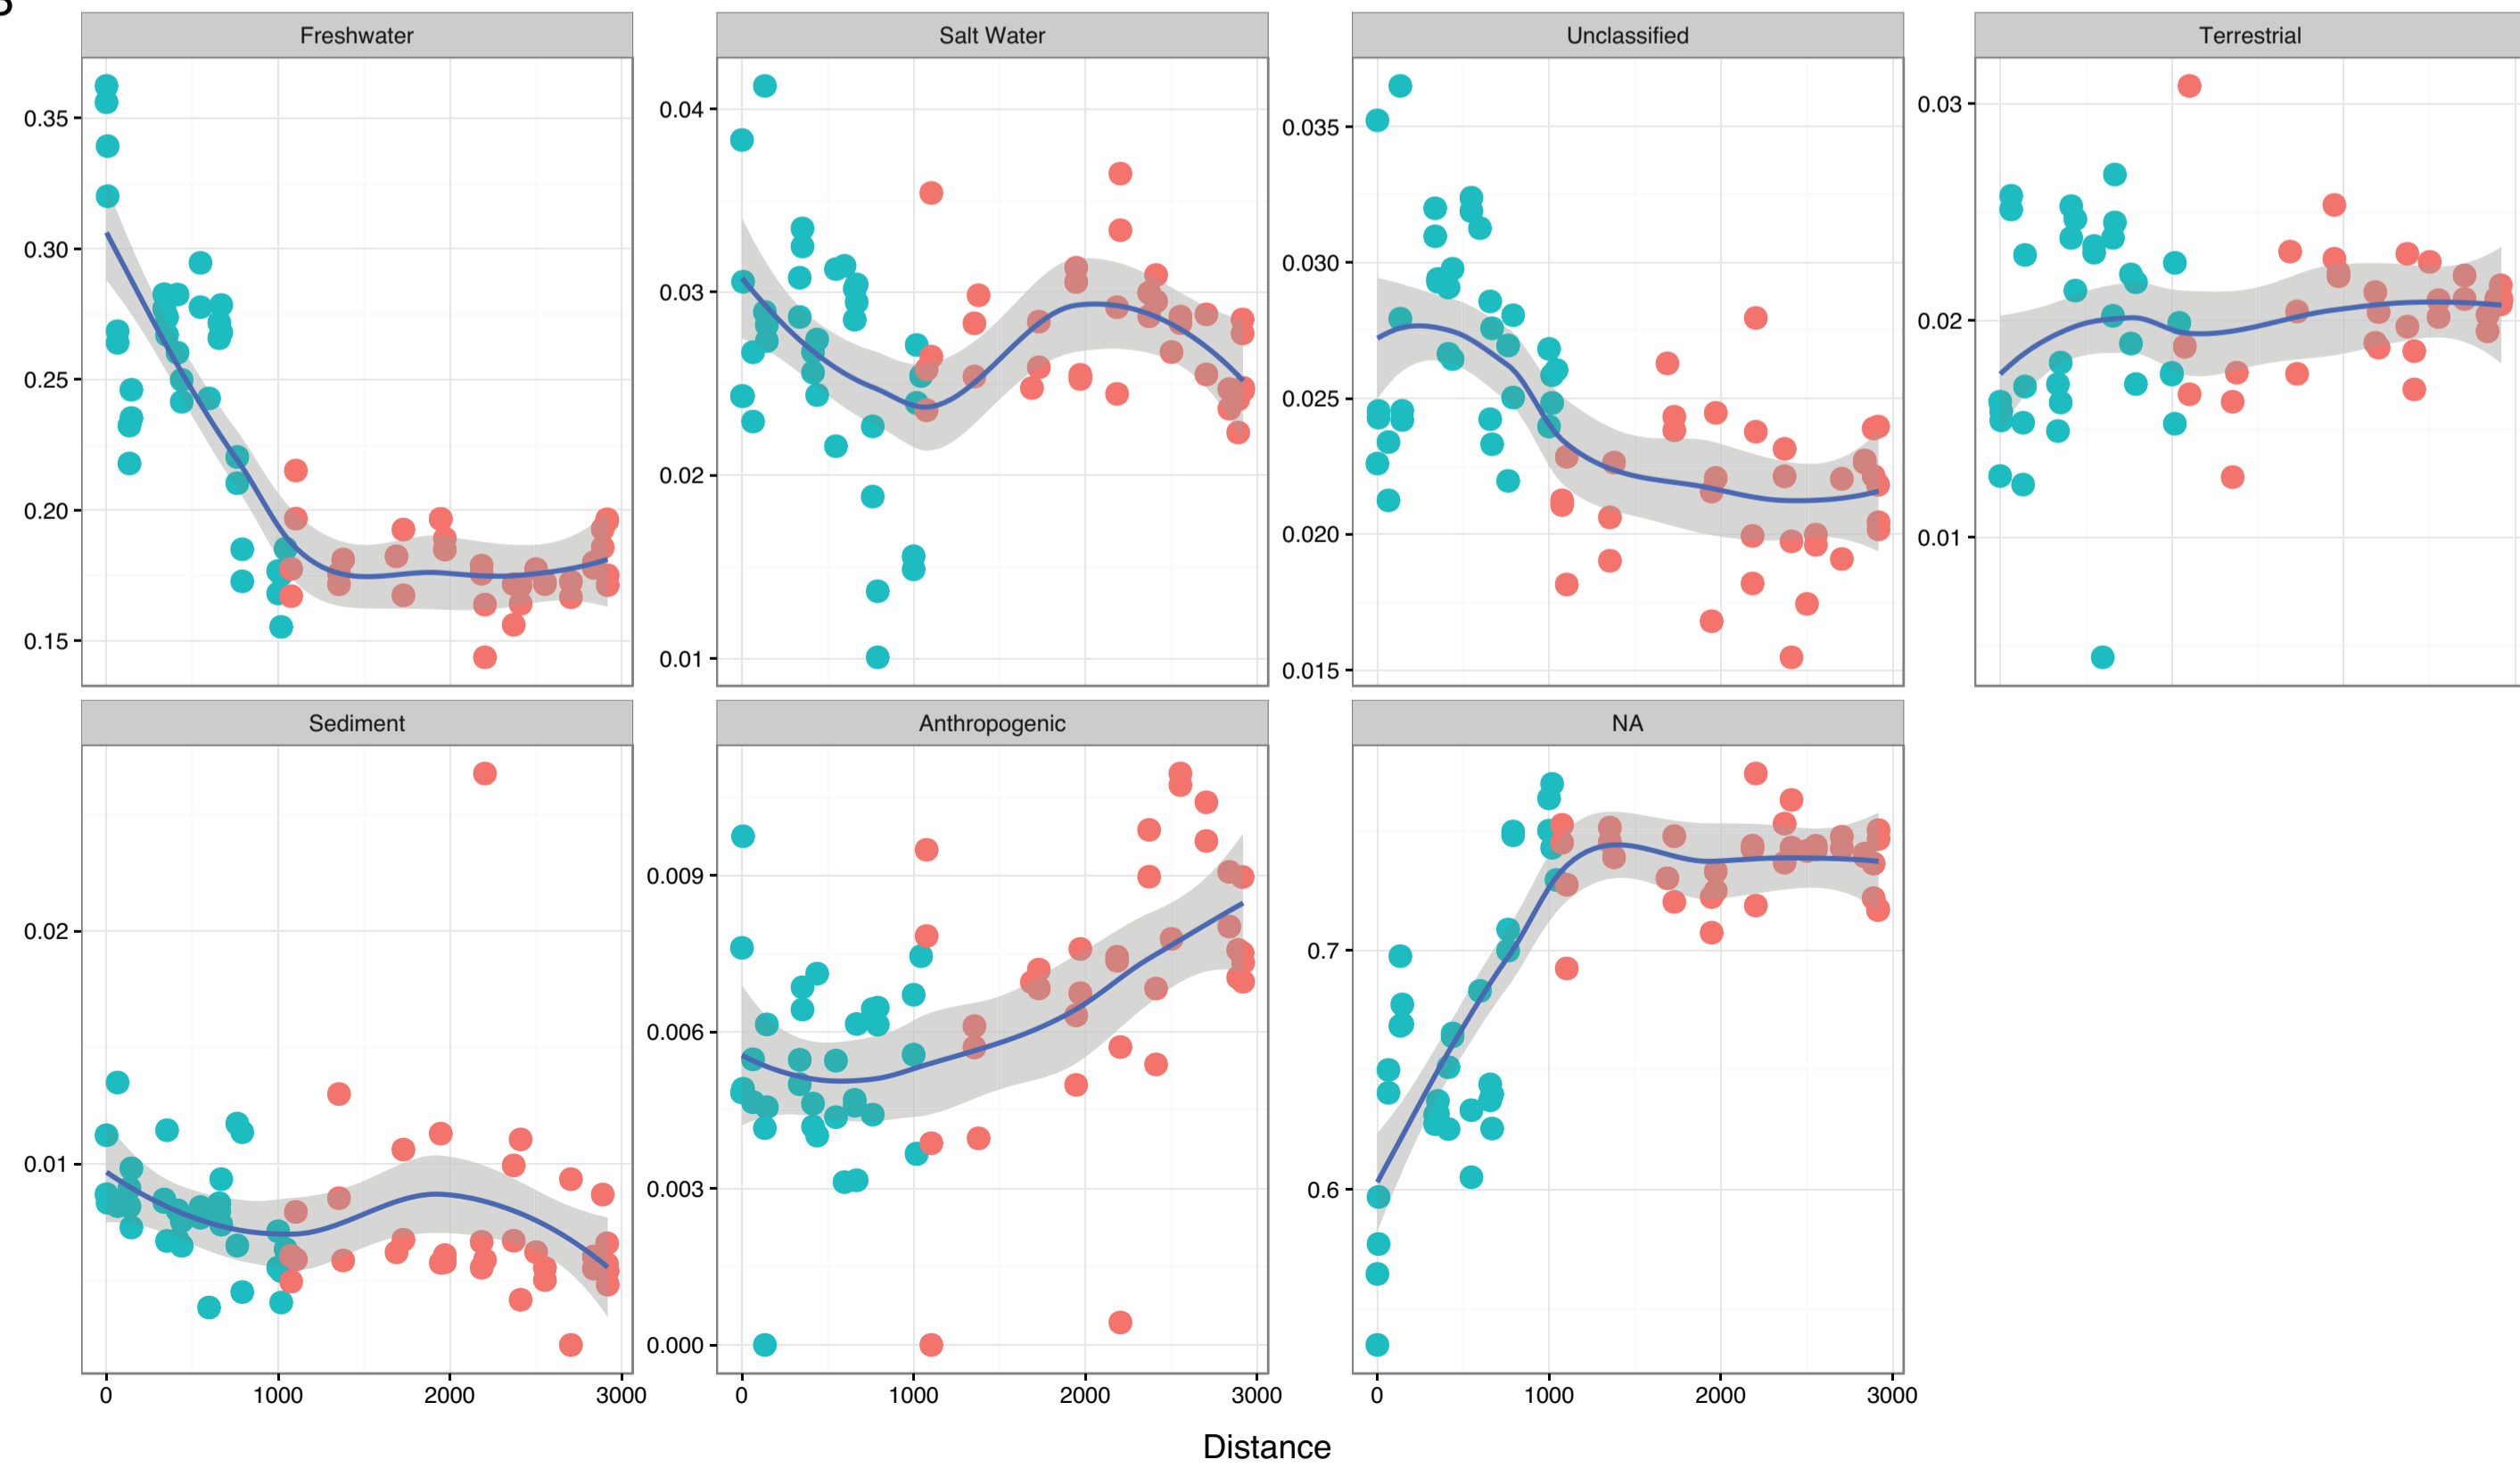

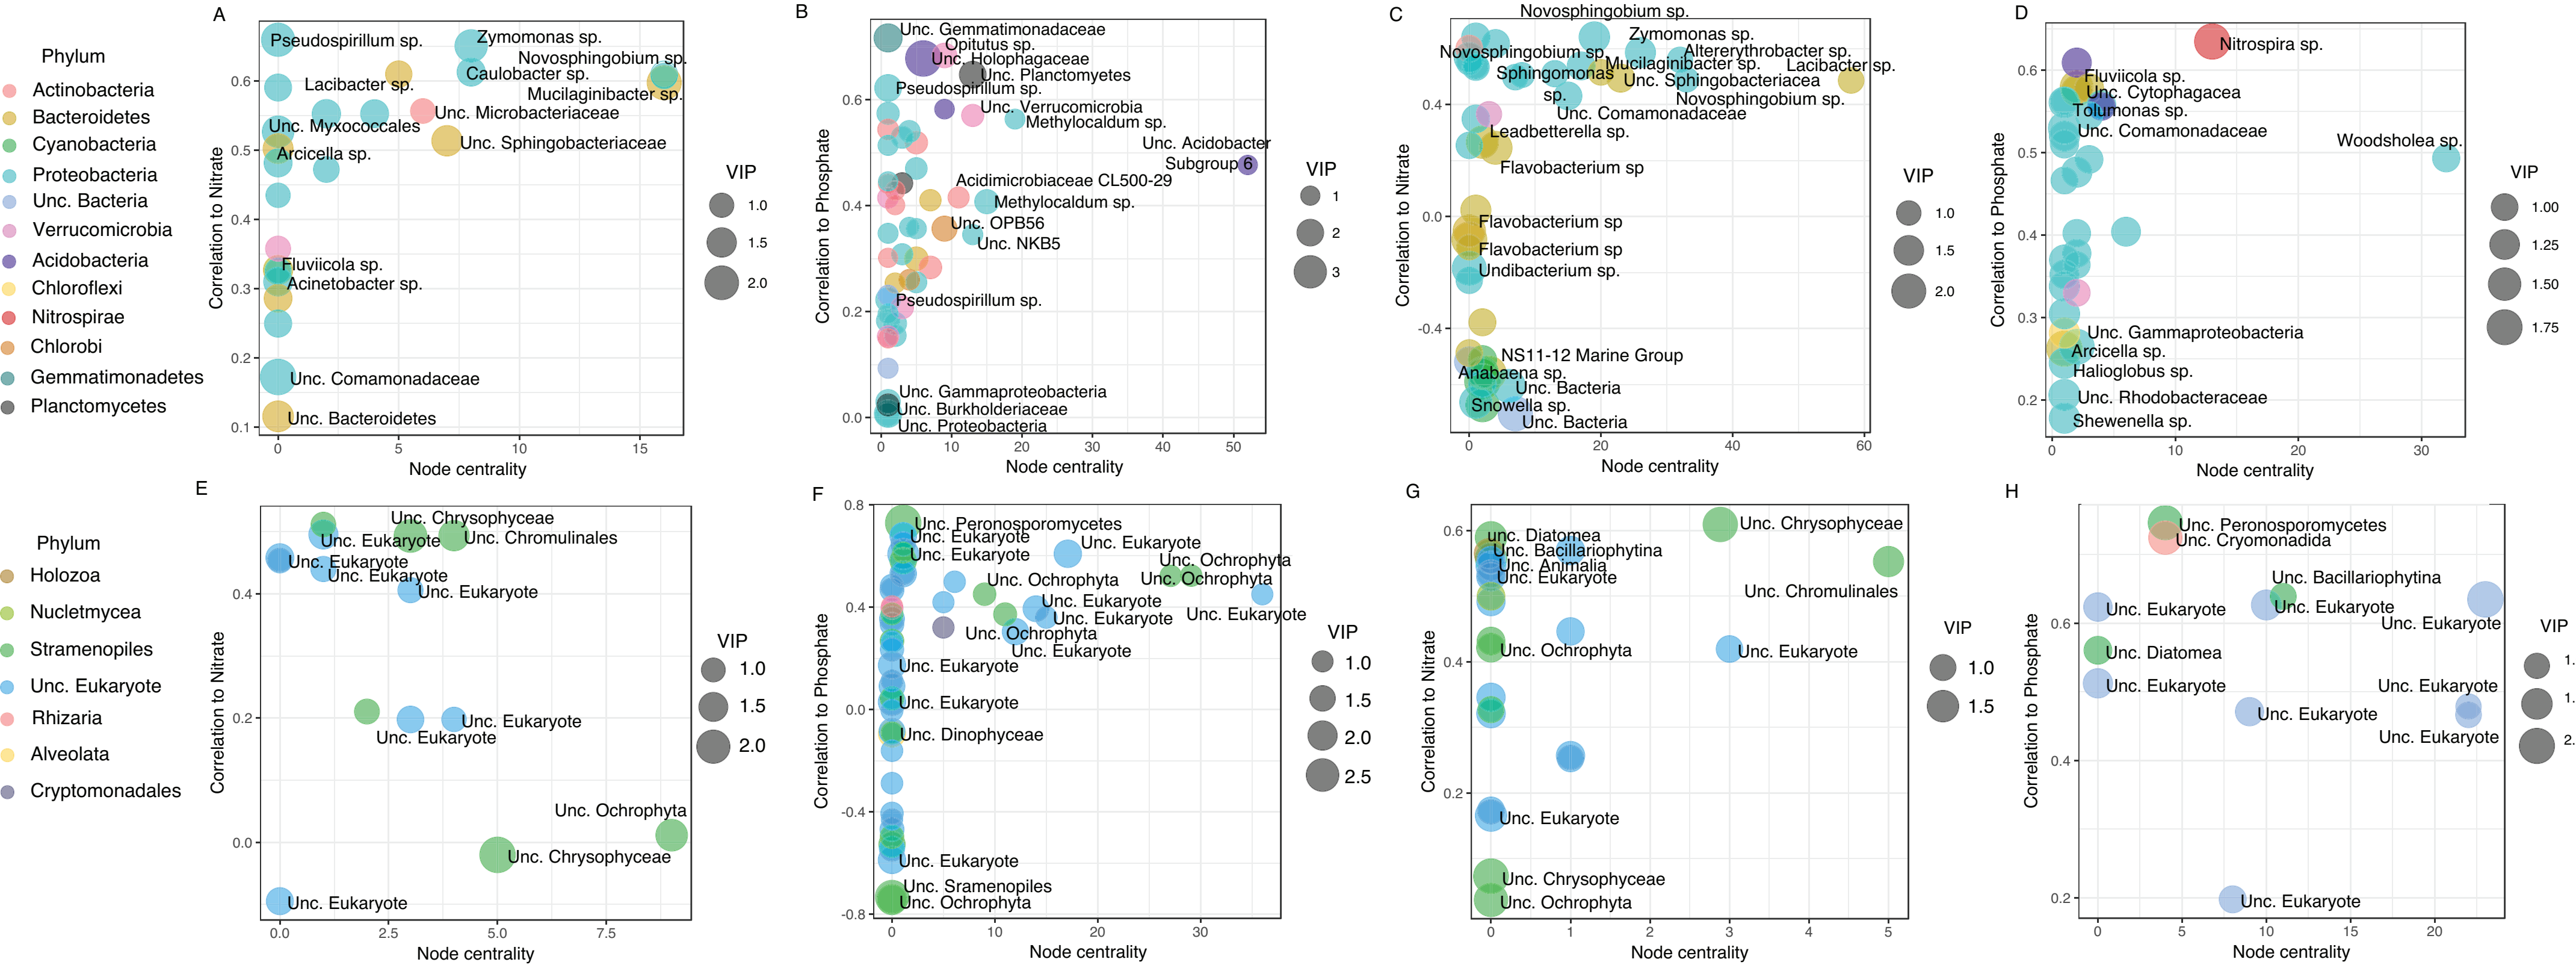

Figure S6 A

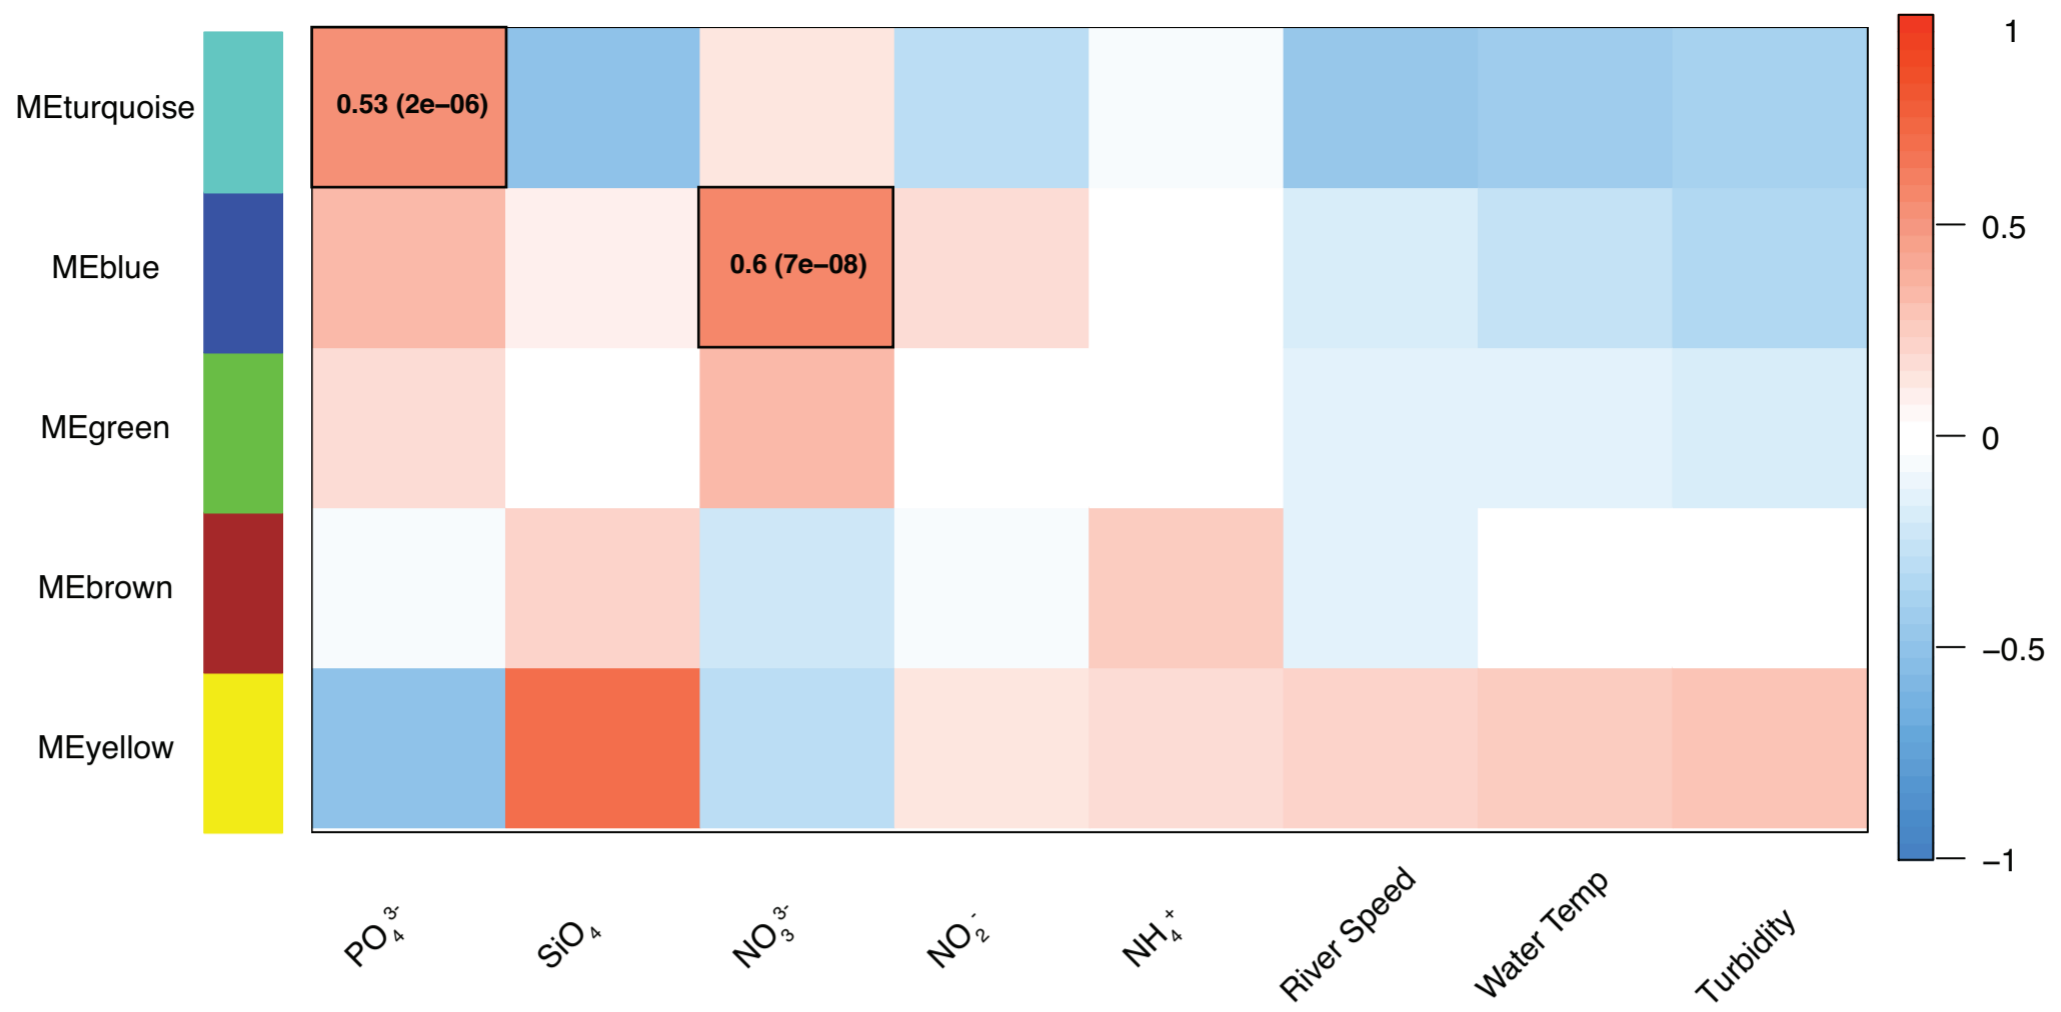

**B** Module membership vs. population significance

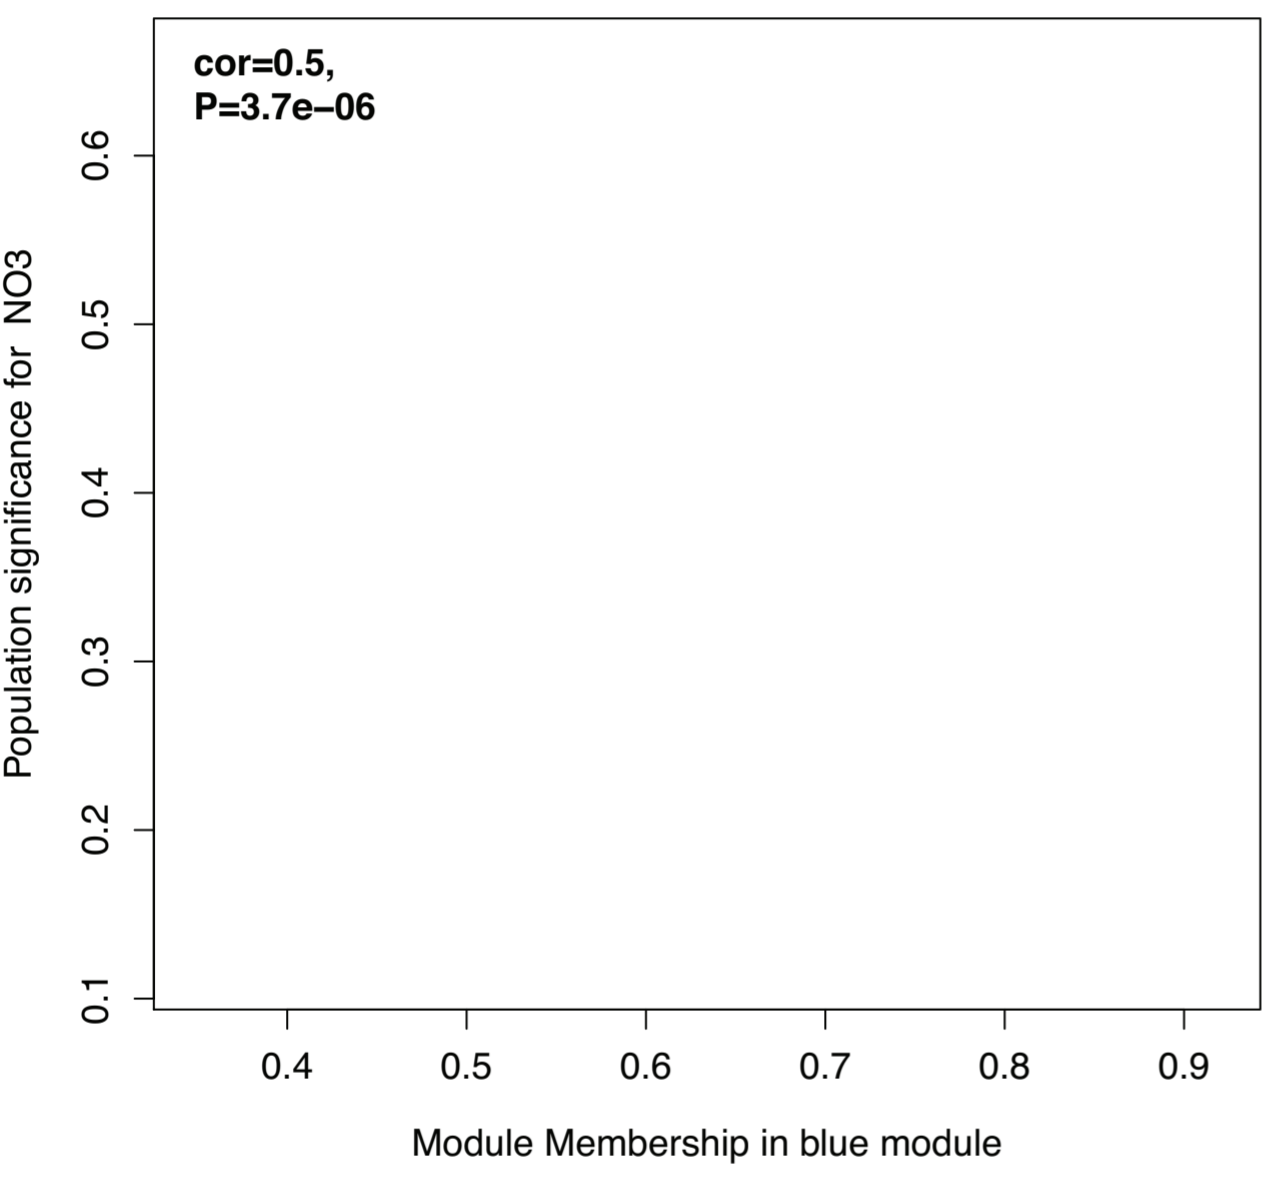

**D** Module membership vs. population significance

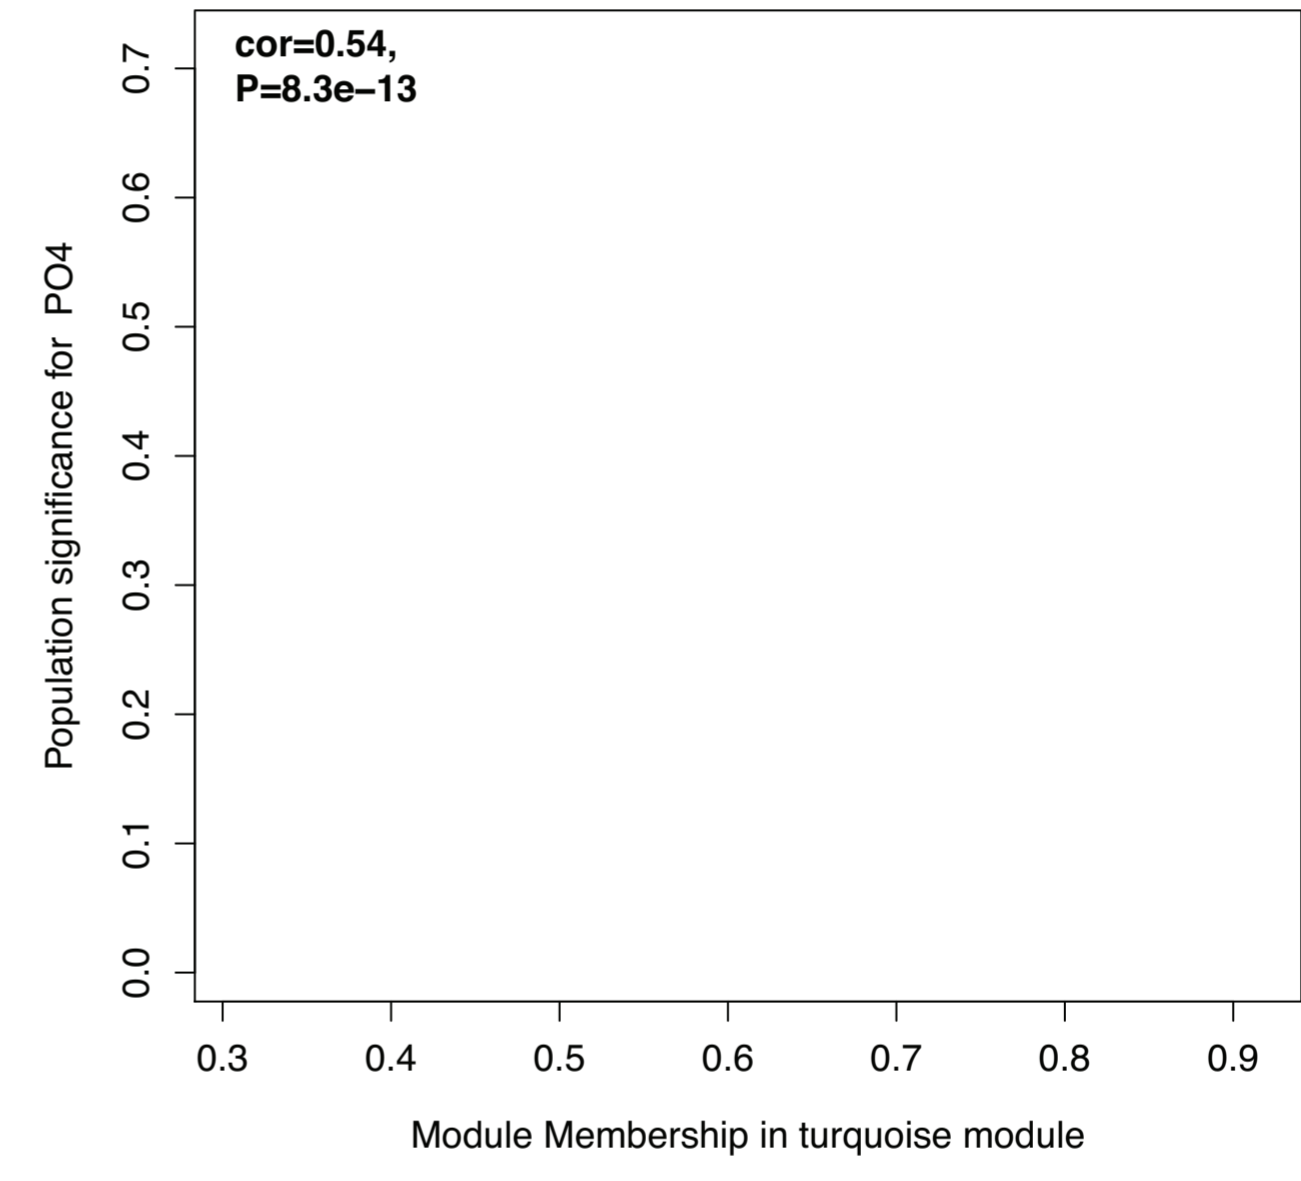

**C** Comparison of  $NO_3$  measured vs predicted for module blue

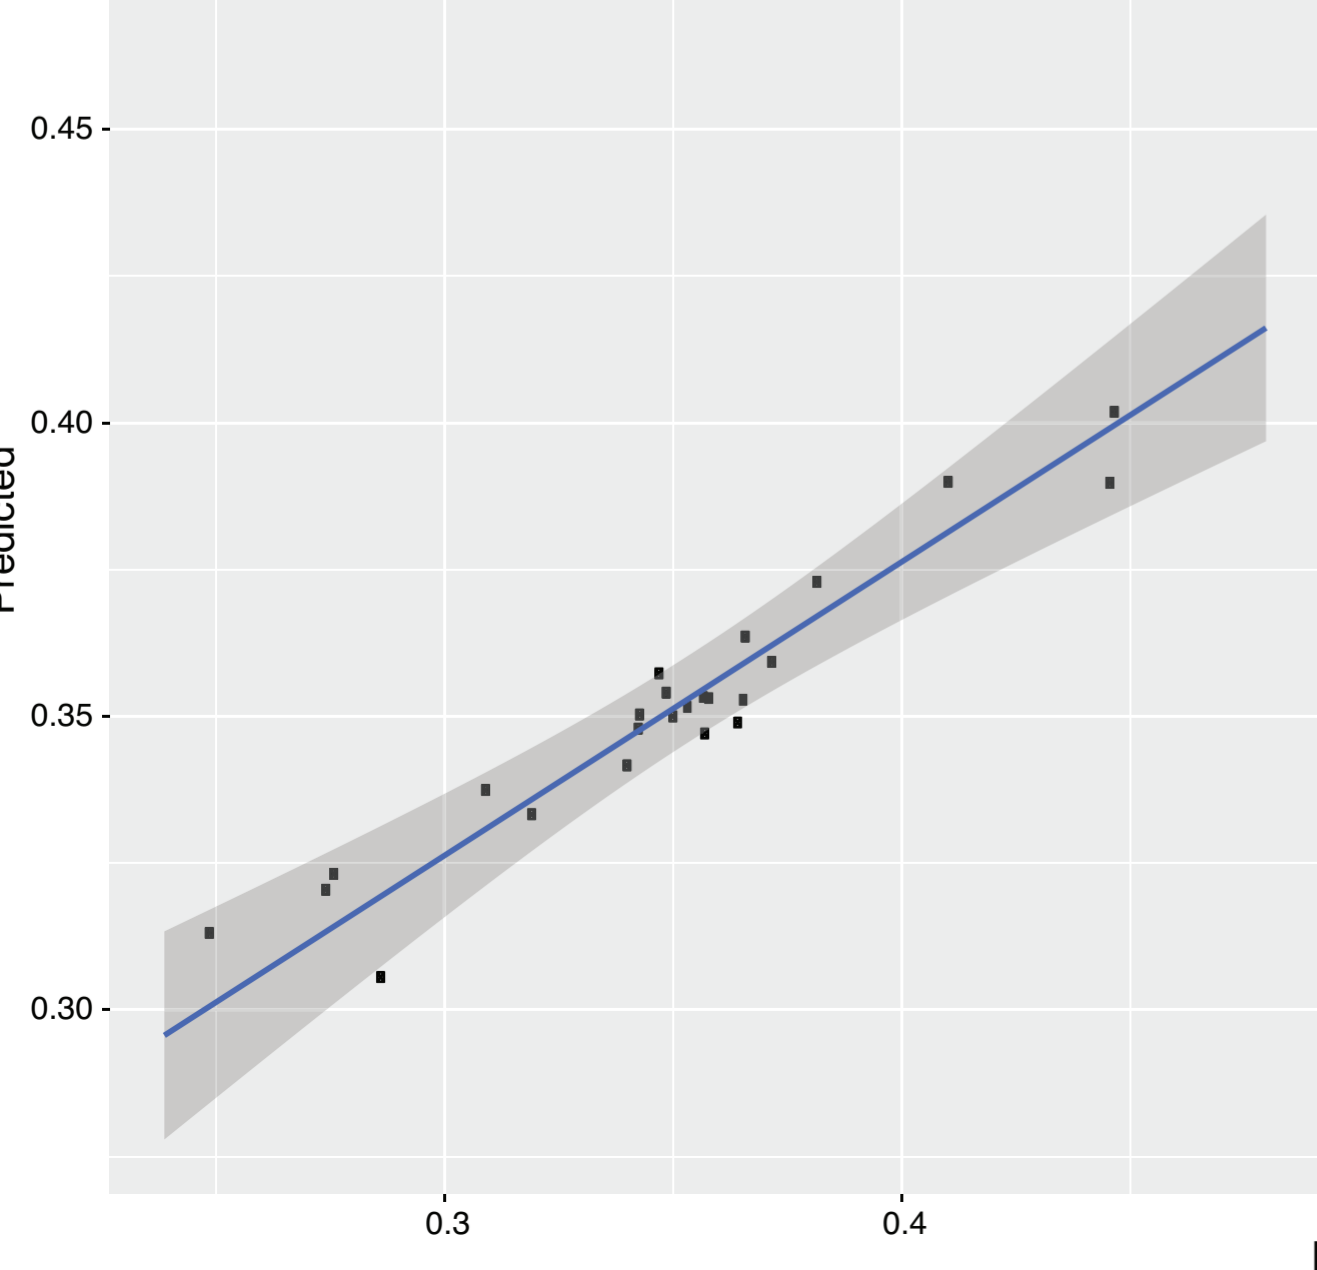

**E** Comparison of  $PO_4$  measured vs predicted for module turquoise

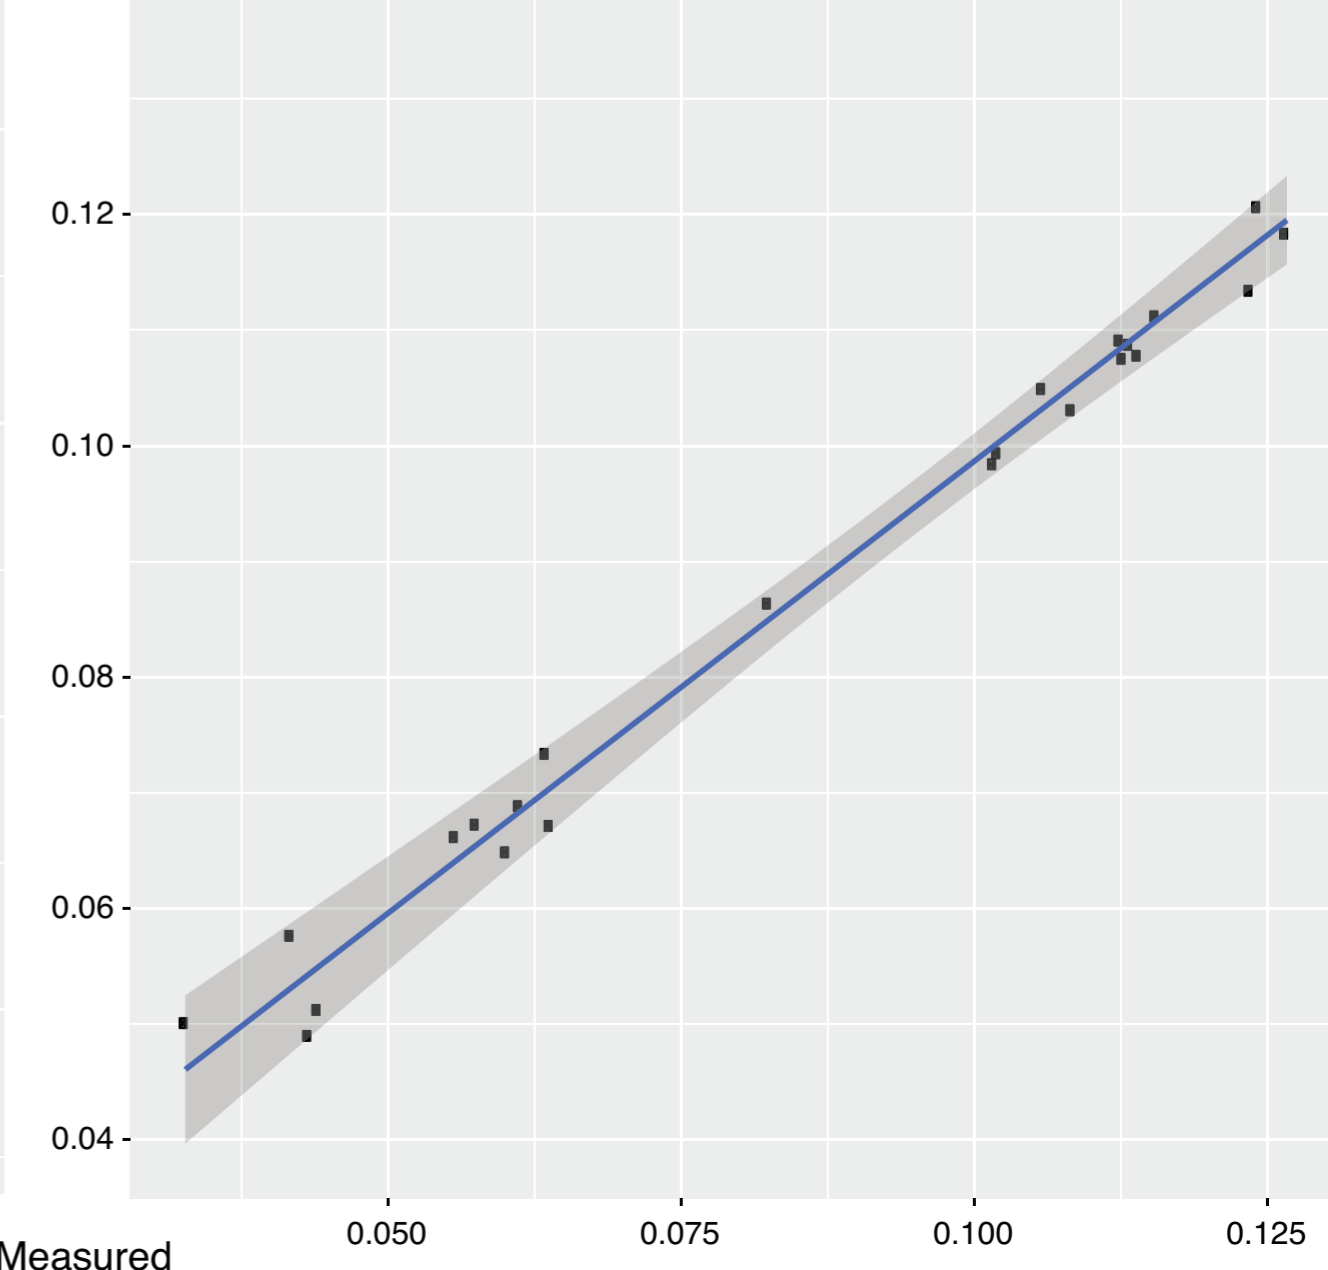

Figure S7 A

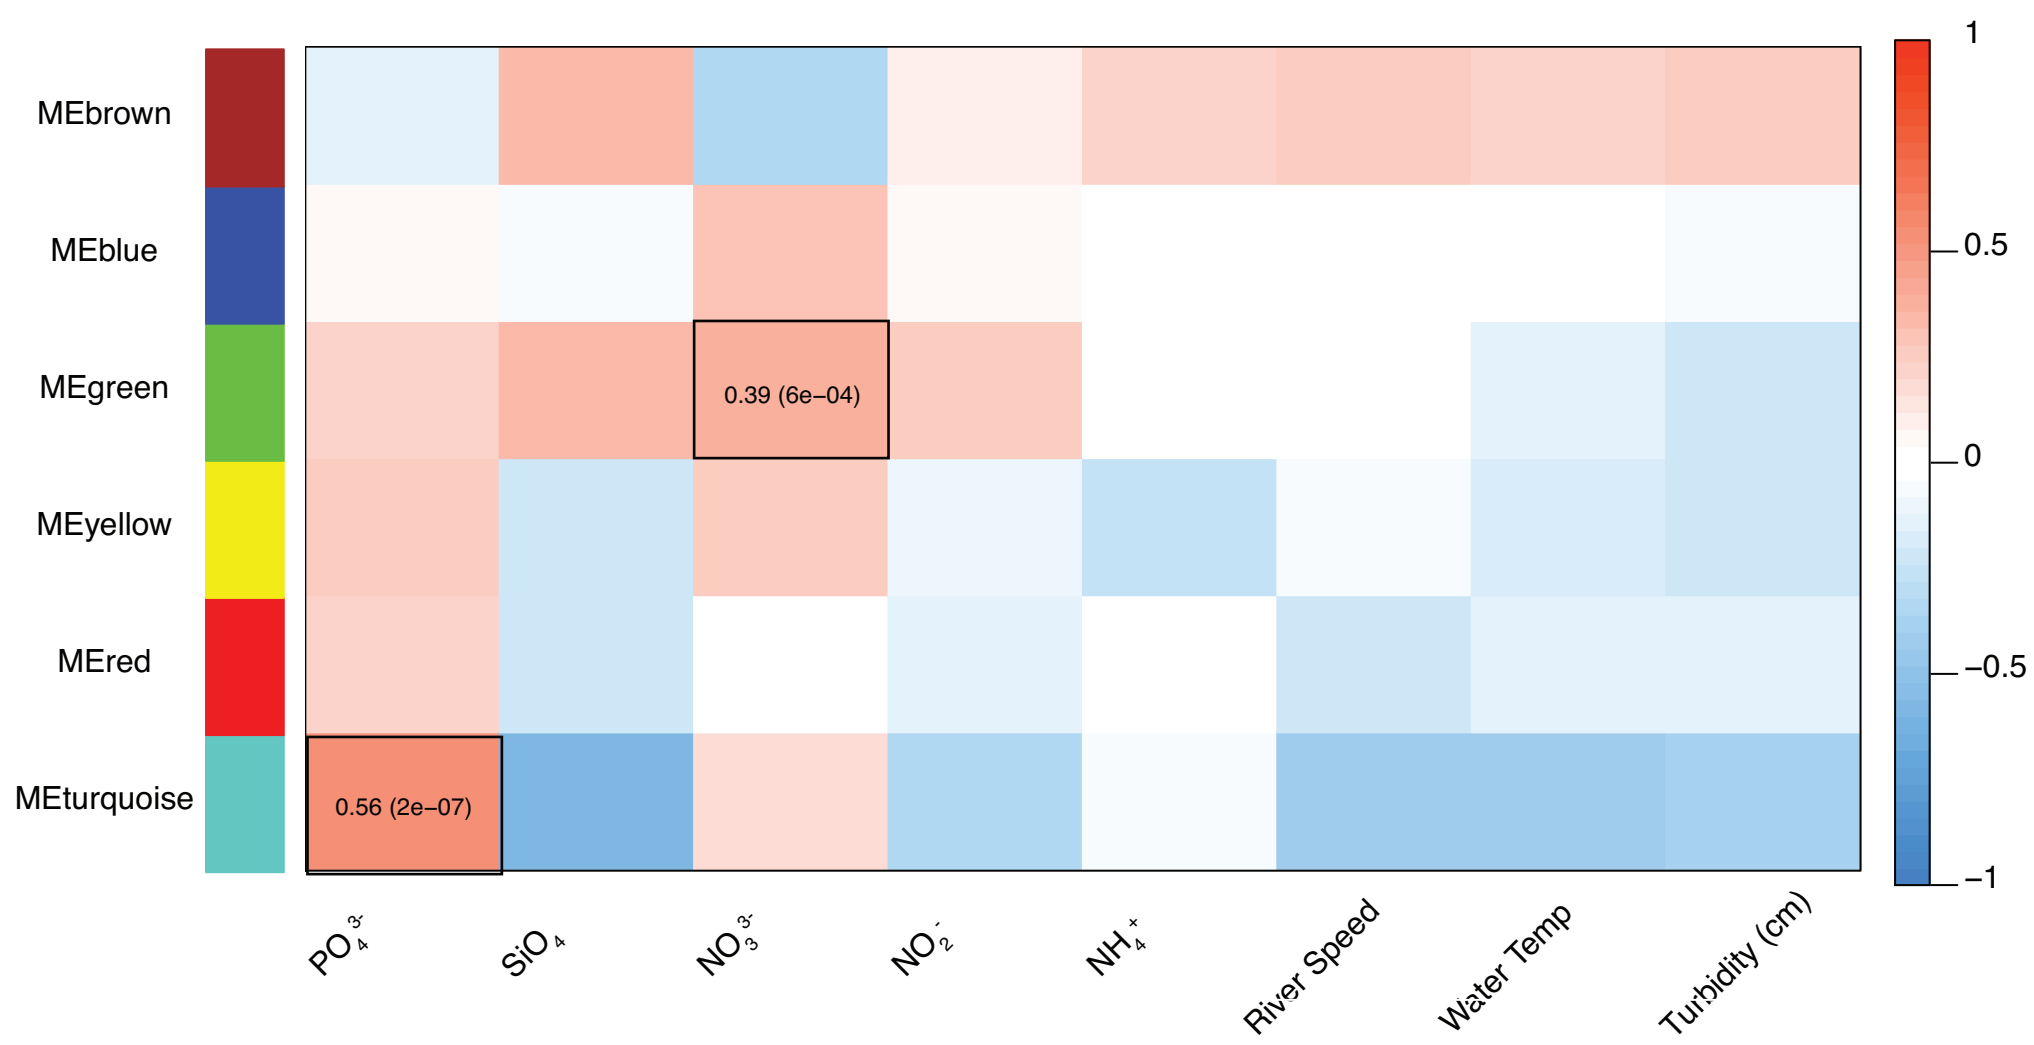

B Module membership vs. population significance

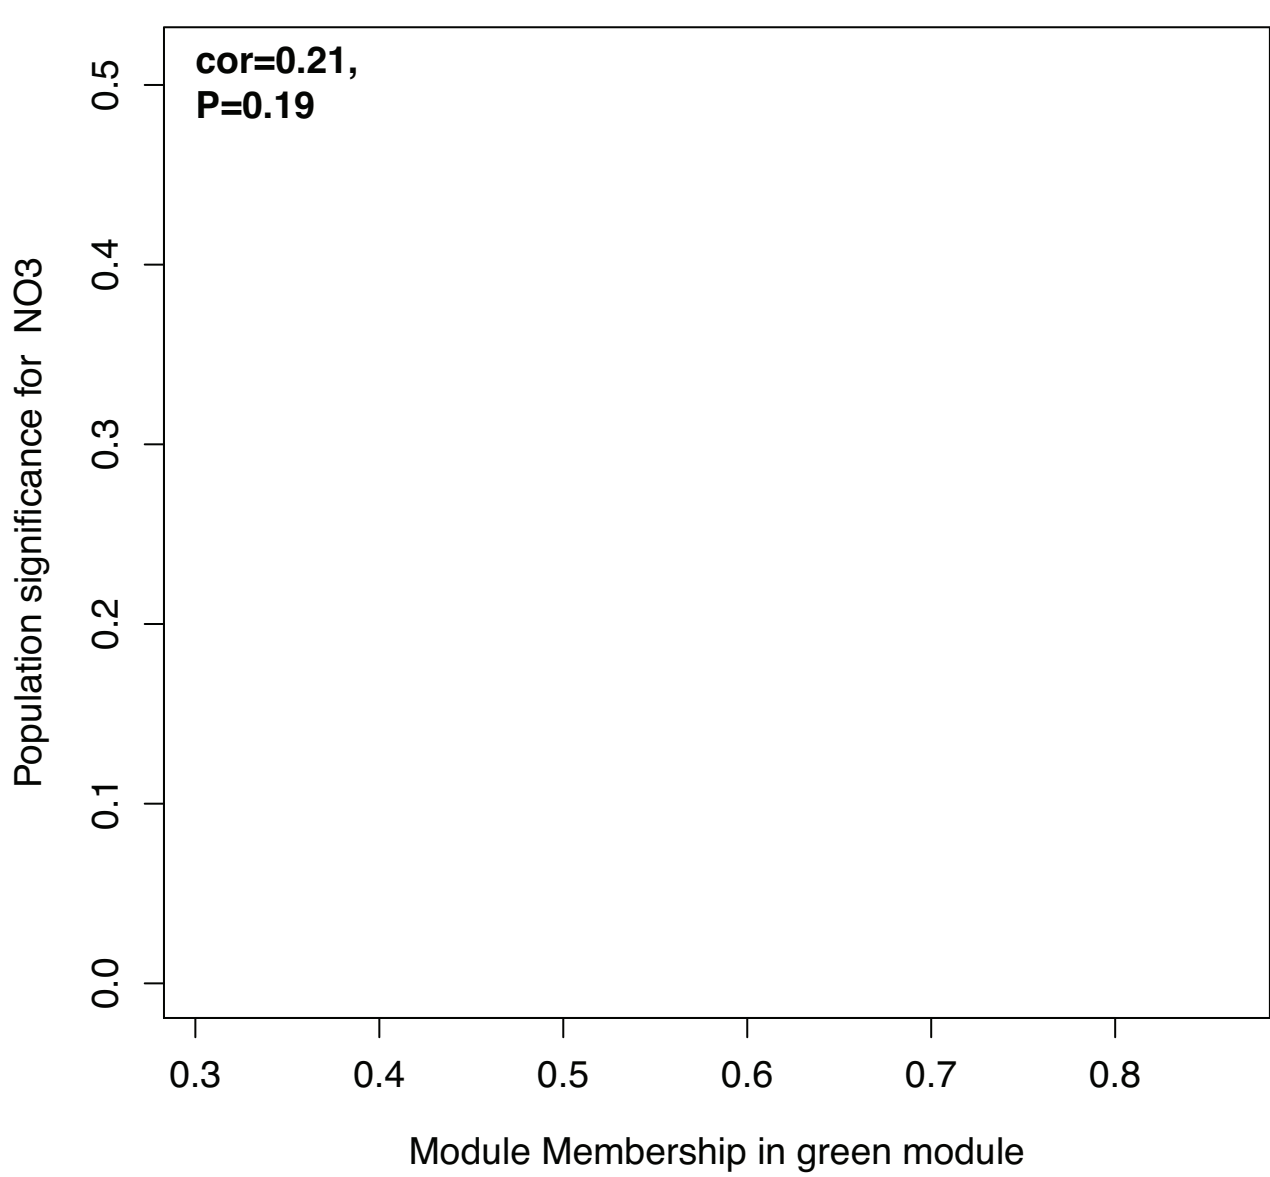

D Module membership vs. population significance

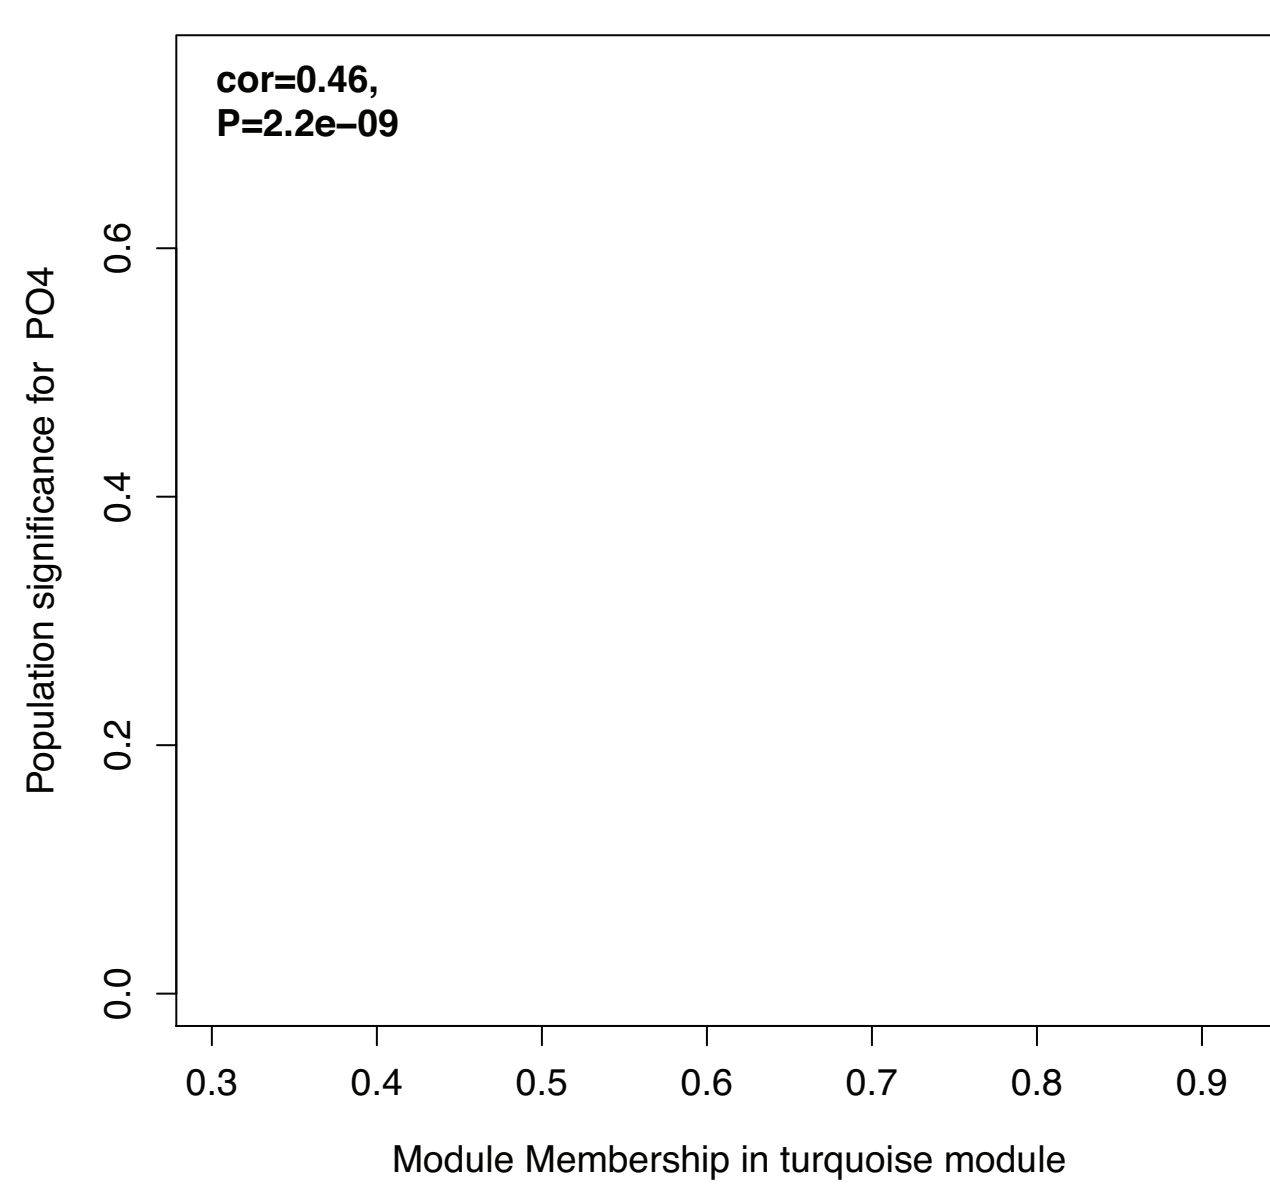

C Comparison of  $NO_3$  measured vs predicted for module green

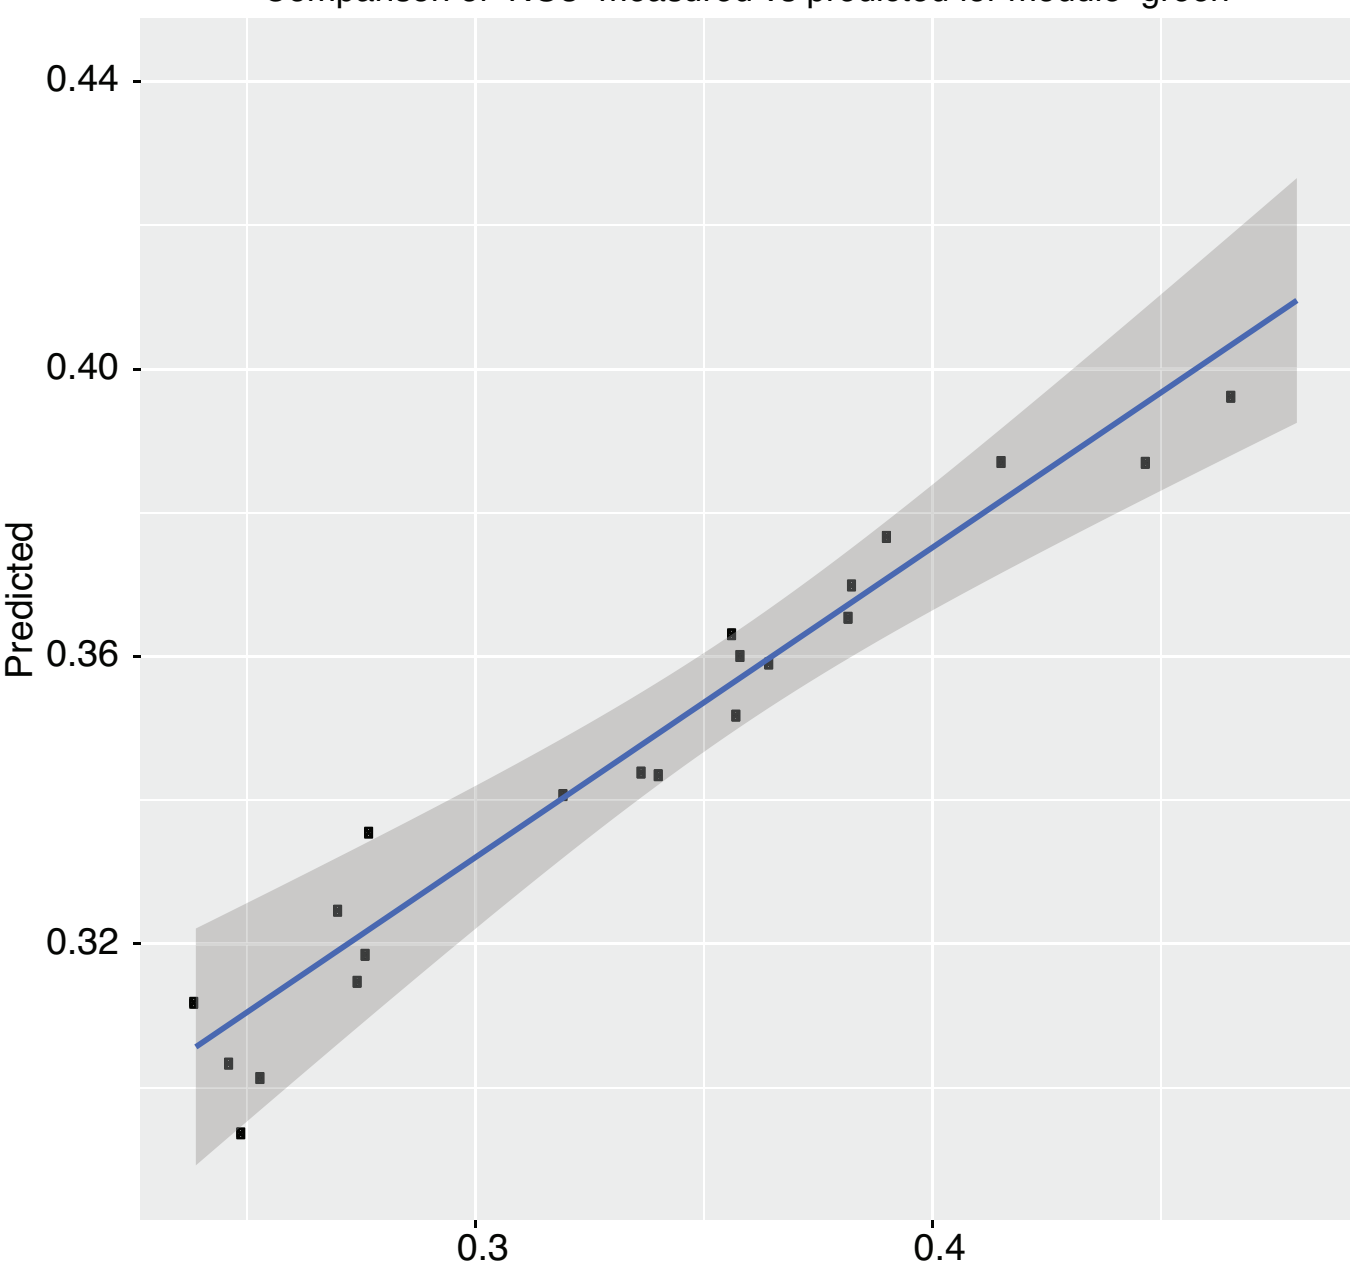

E Comparison of  $PO_4$  measured vs predicted for module turquoise

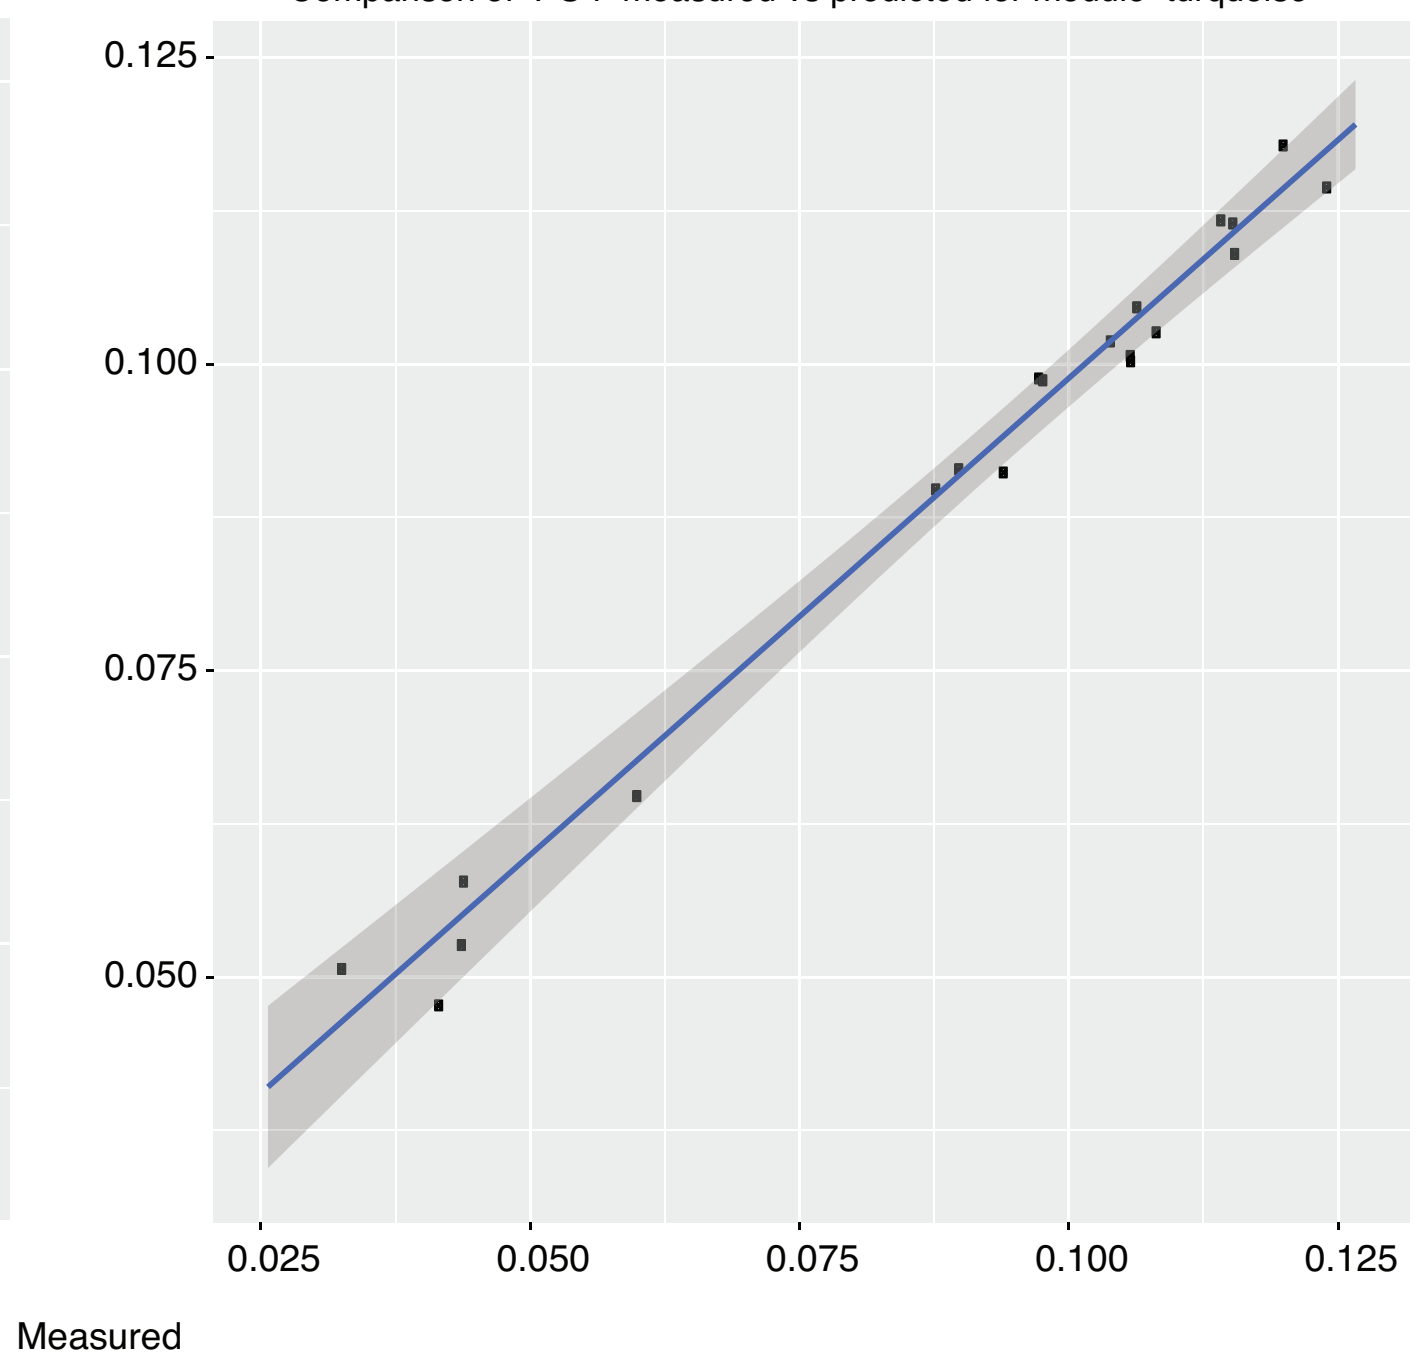



Figure S8 A

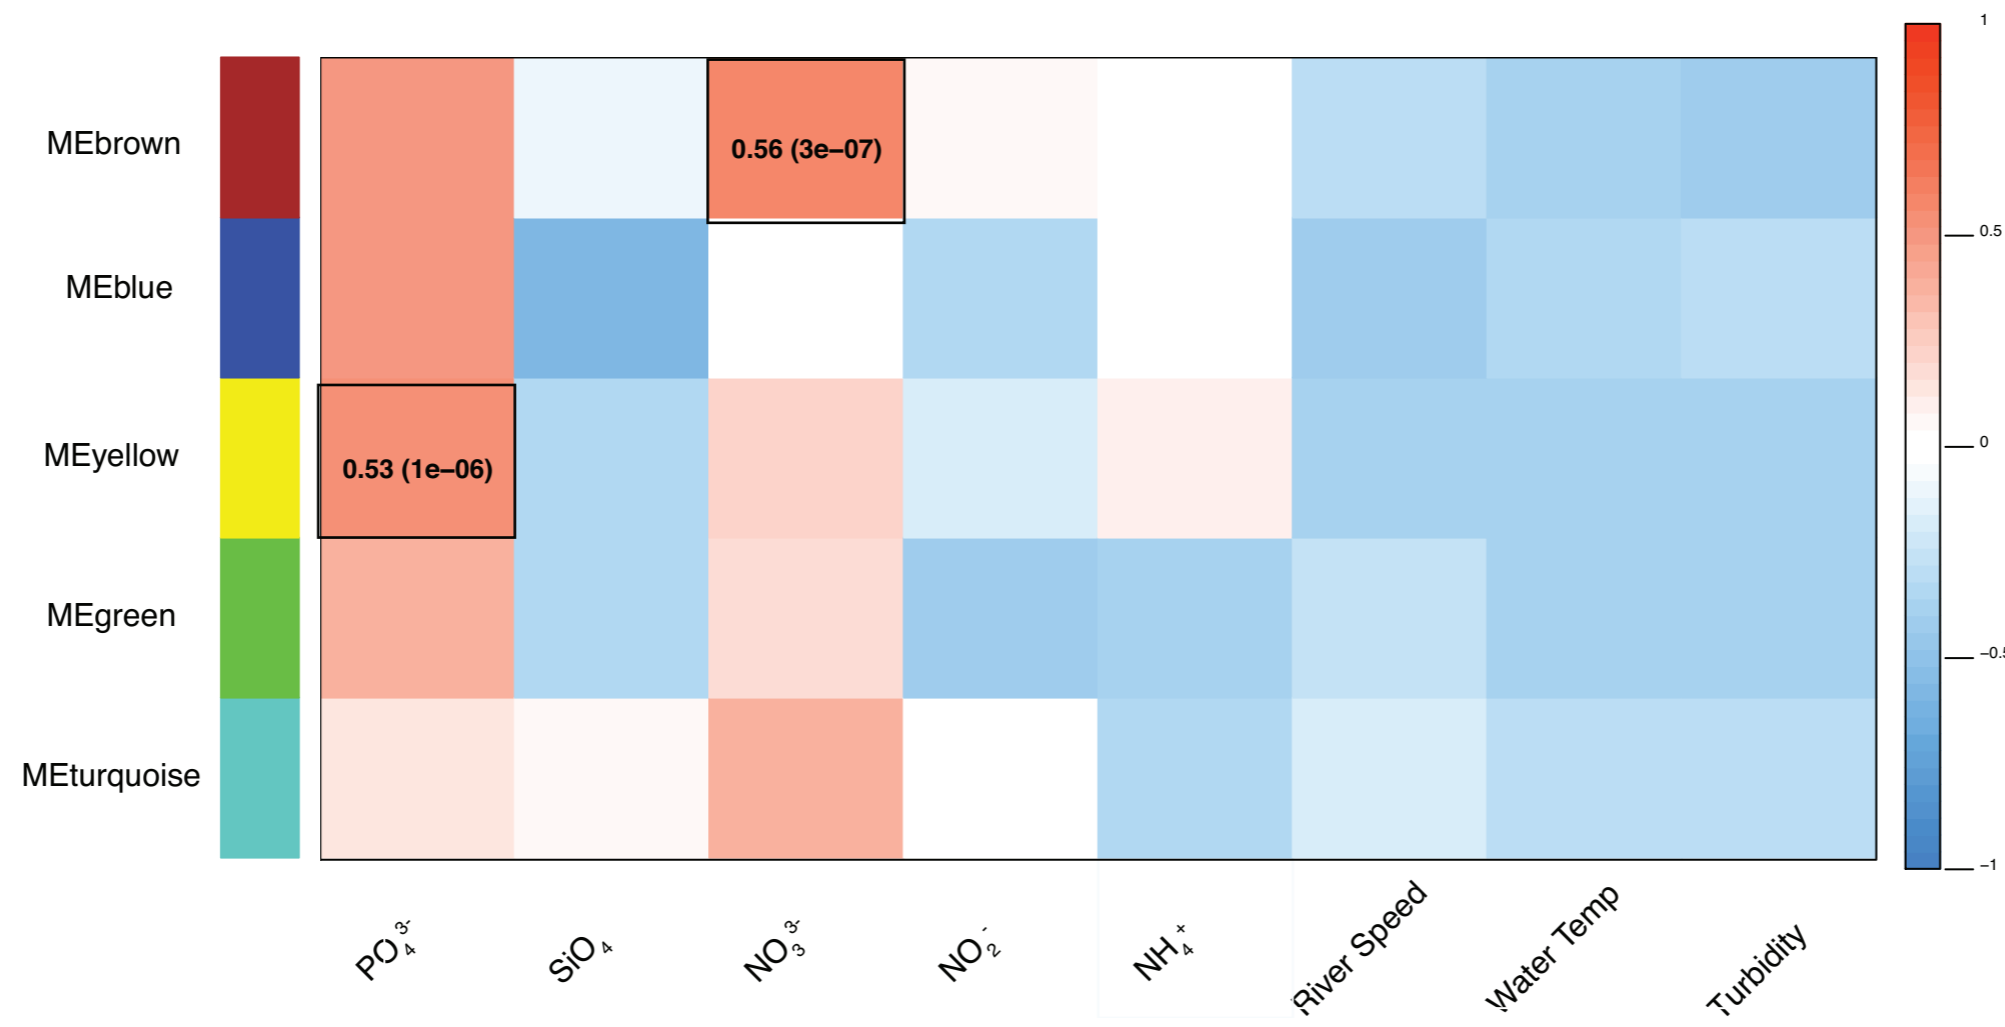

B Module membership vs. population significance

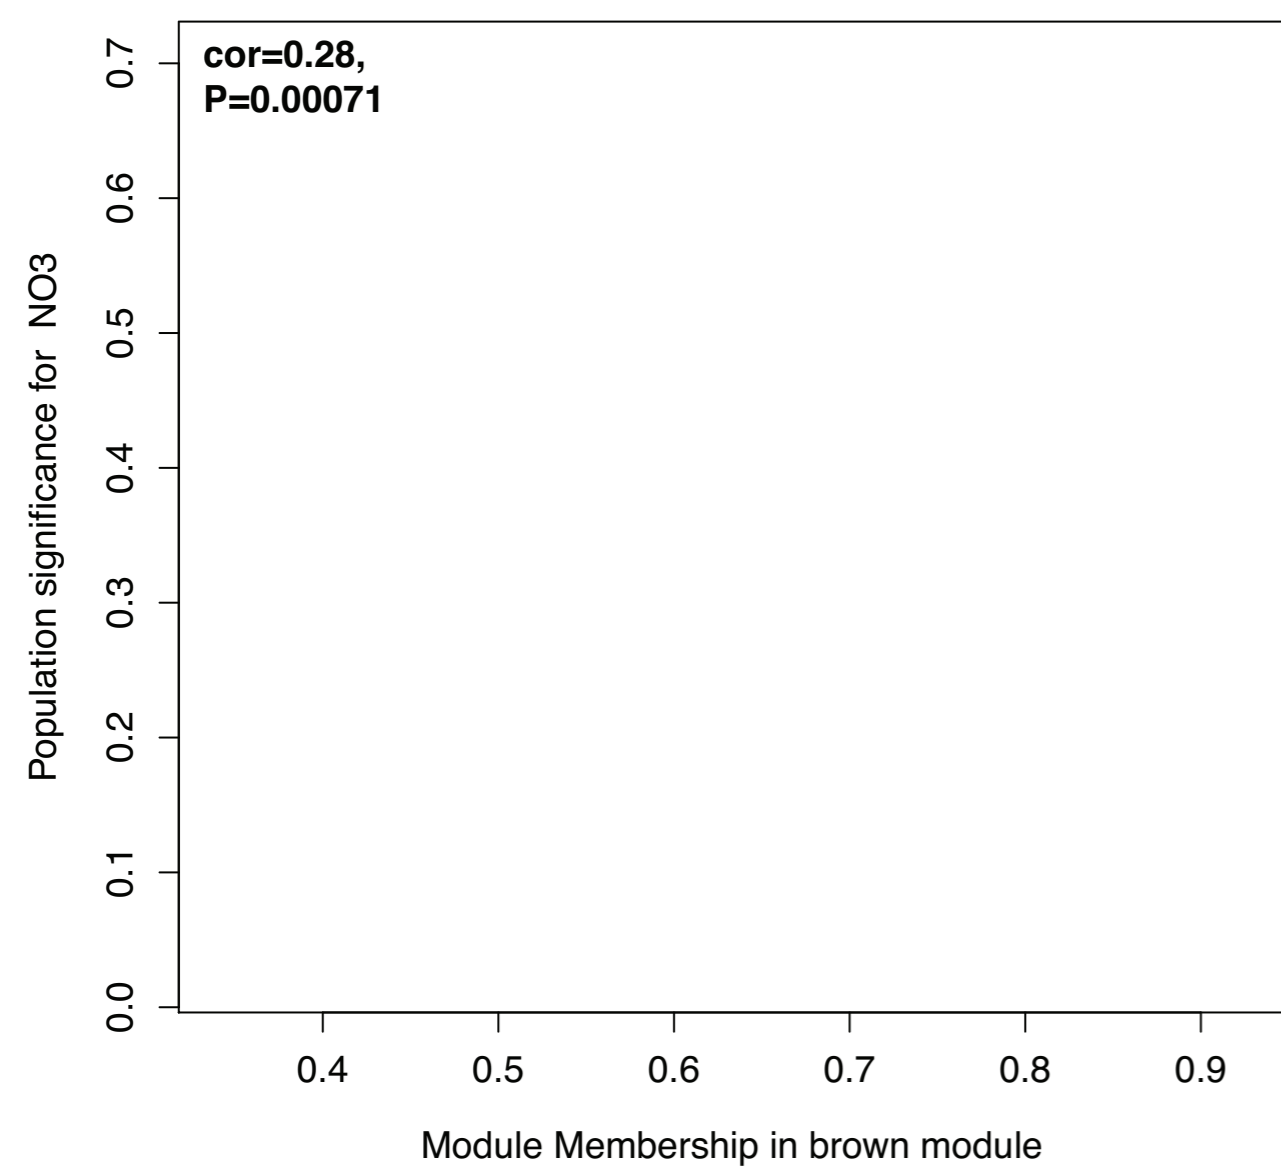

D Module membership vs. population significance

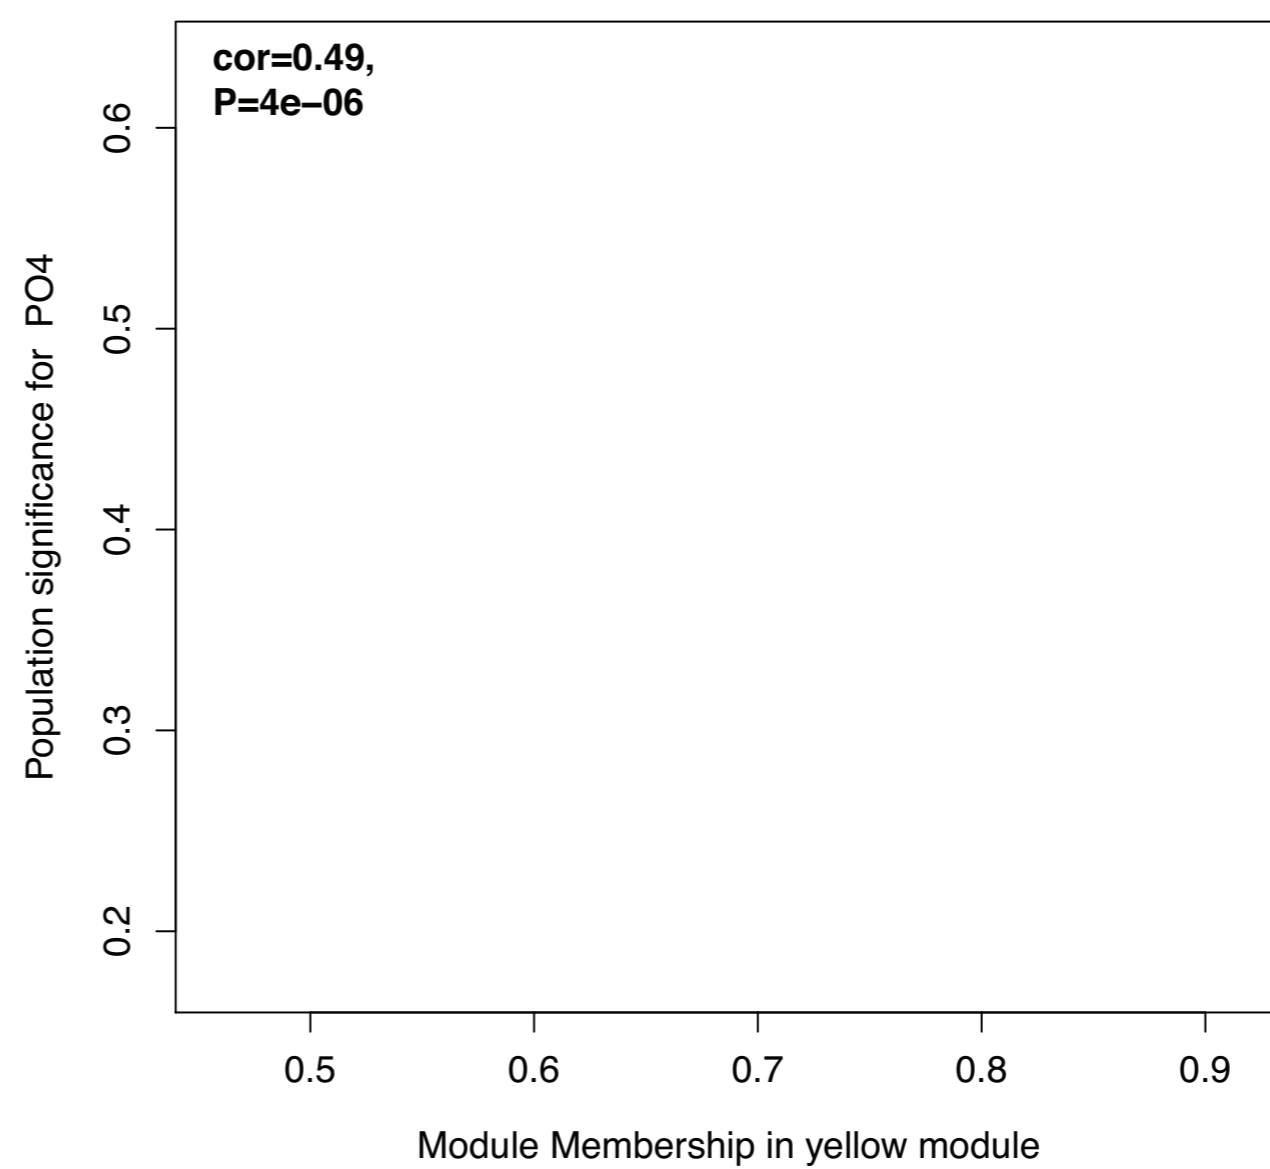

C Comparison of NO<sub>3</sub> measured vs predicted for module brown

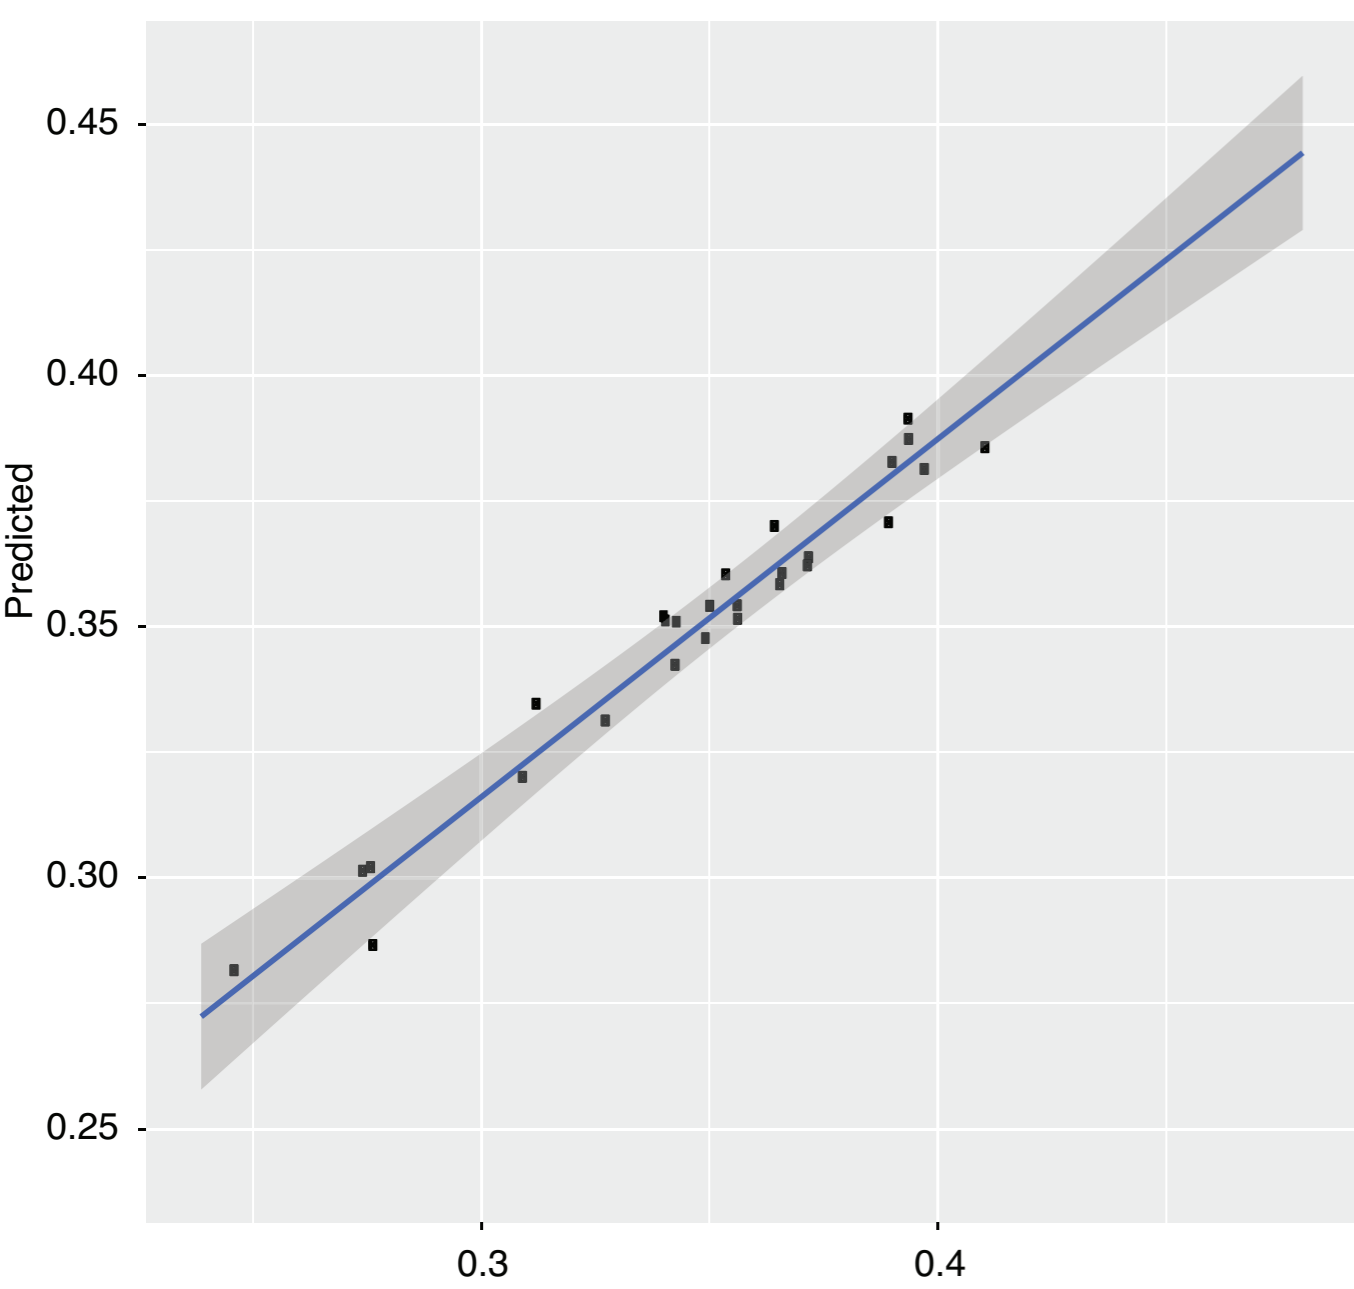

E Comparison of PO<sub>4</sub> measured vs. predicted for module yellow

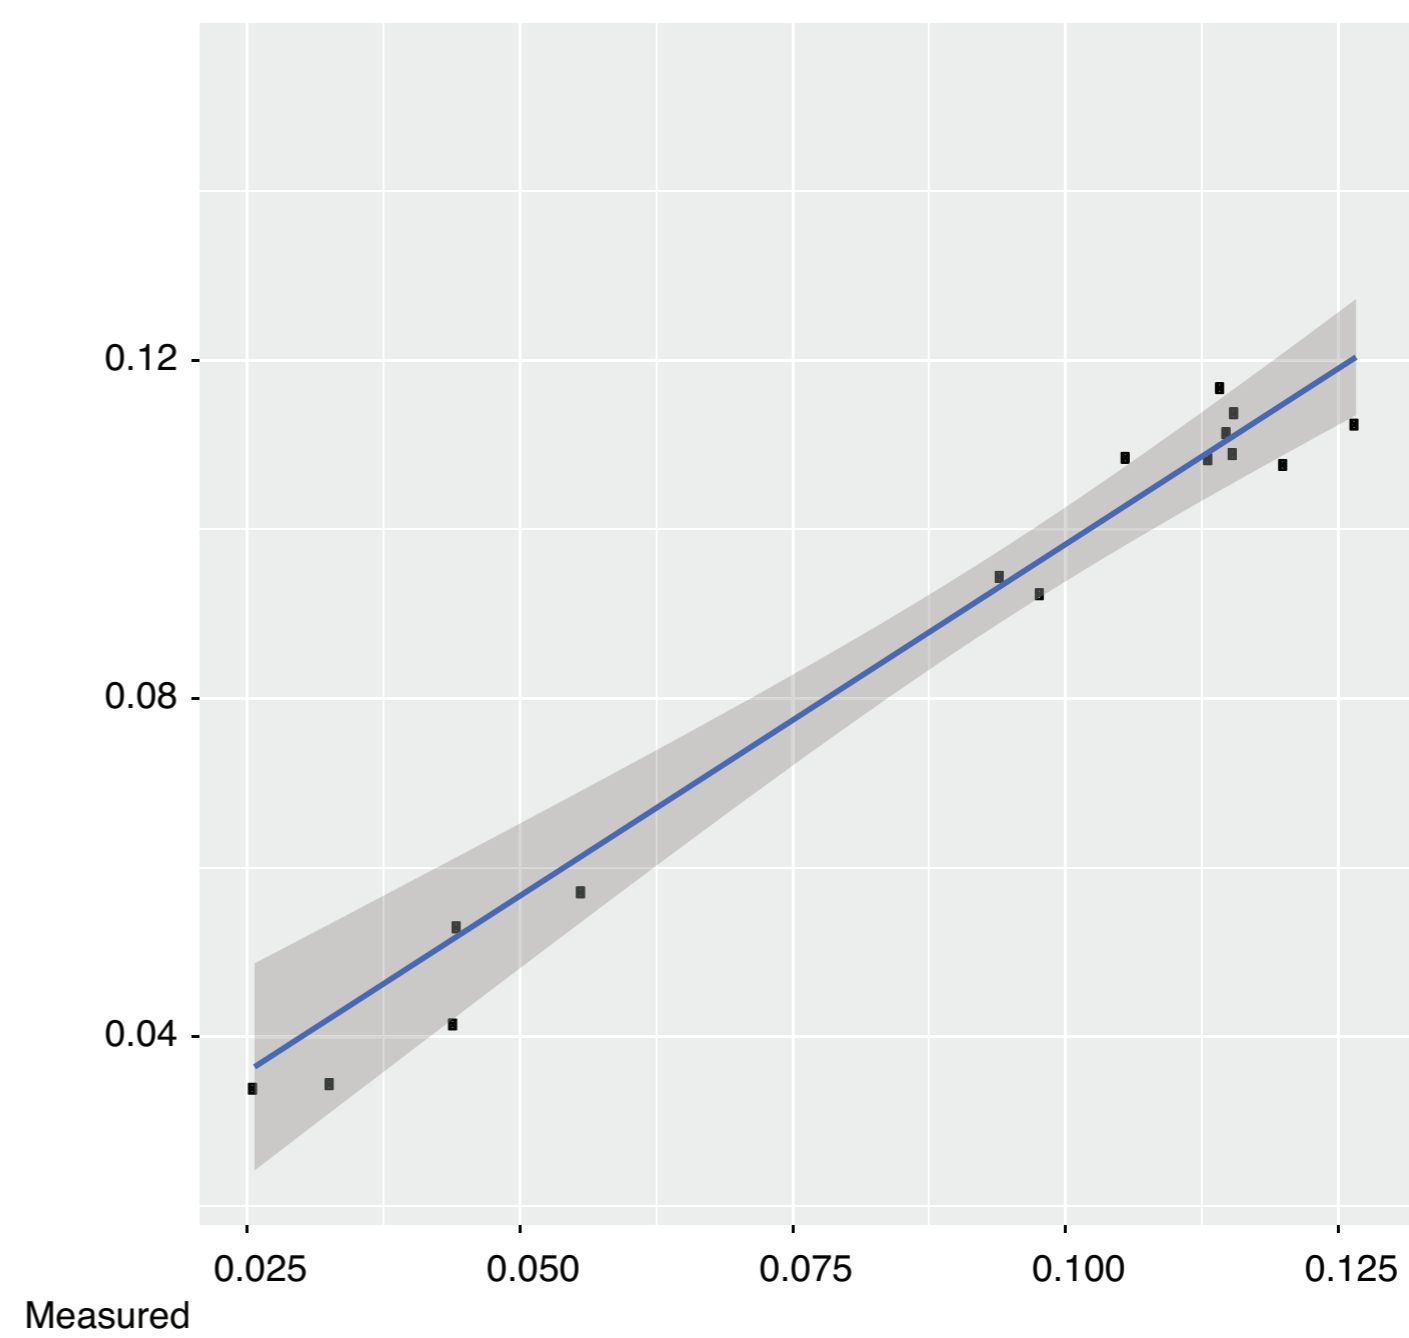

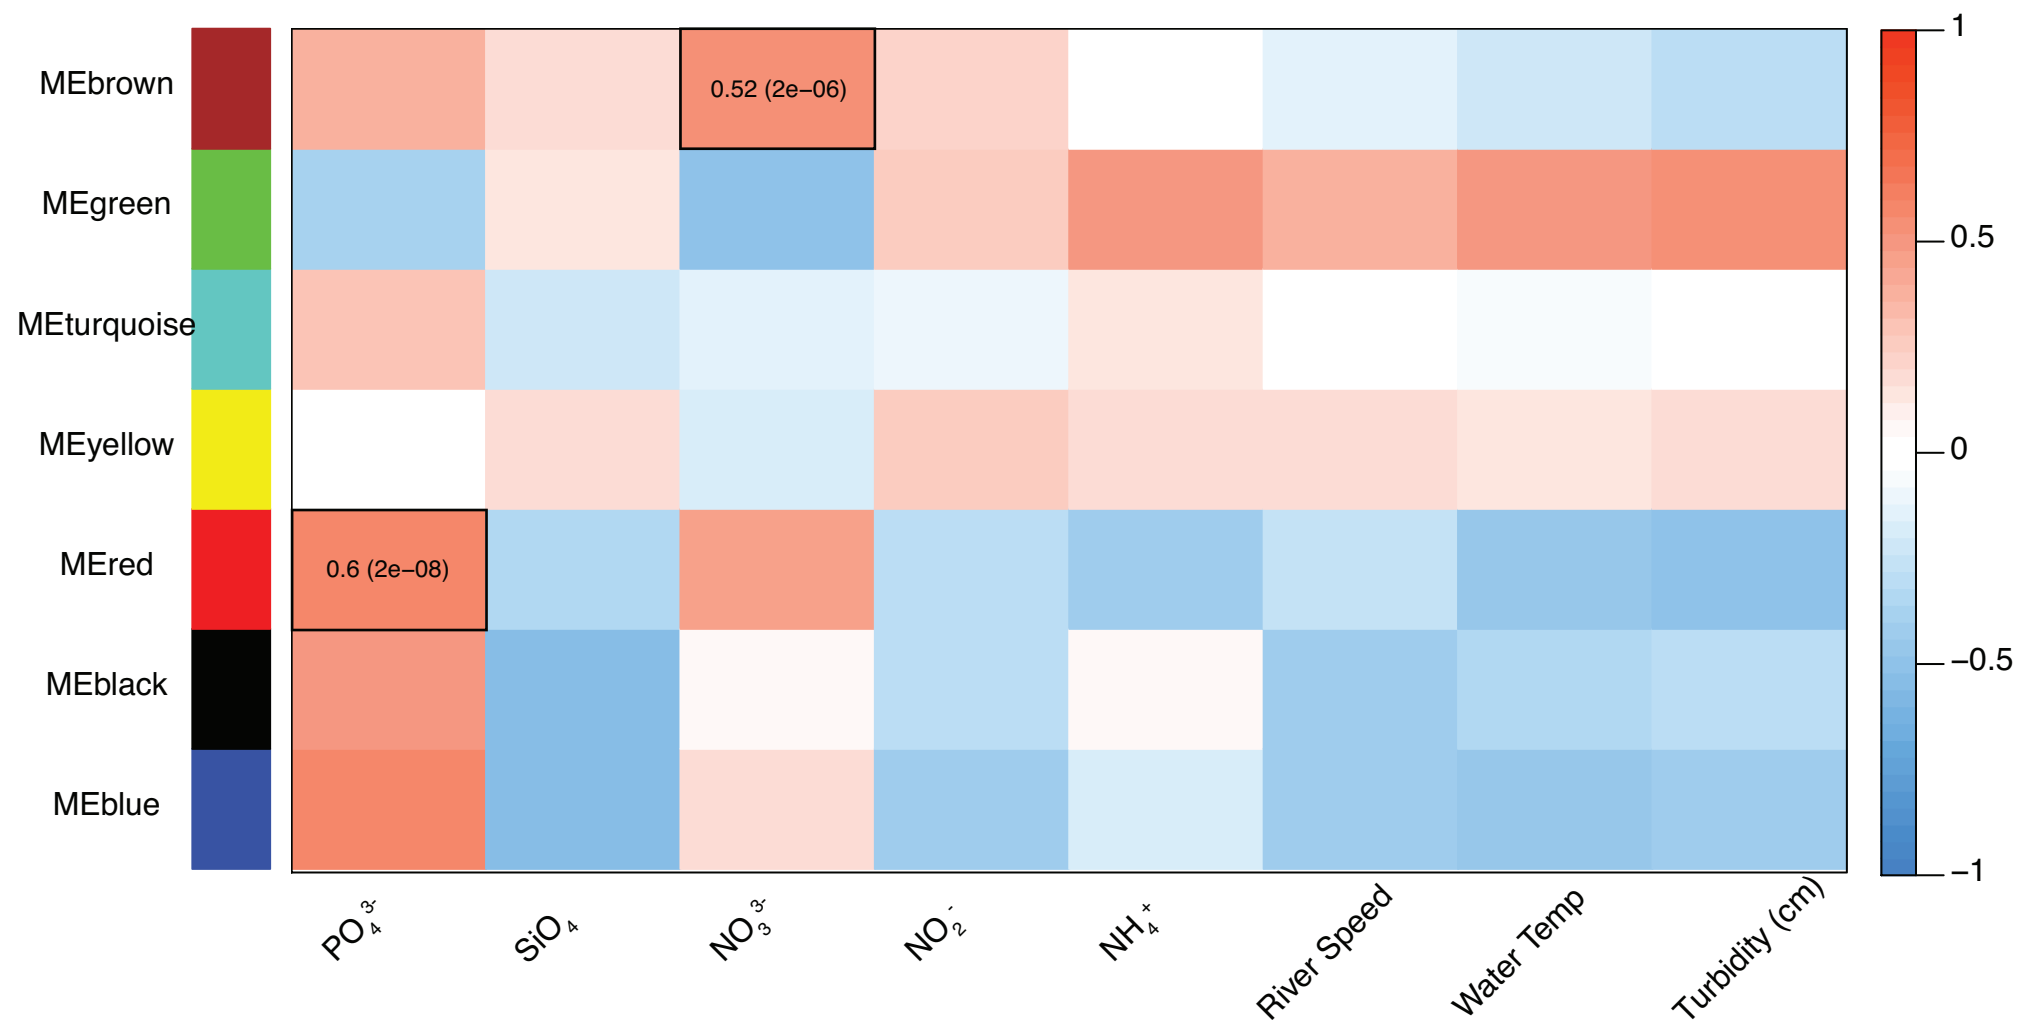

B Module membership vs. population significance

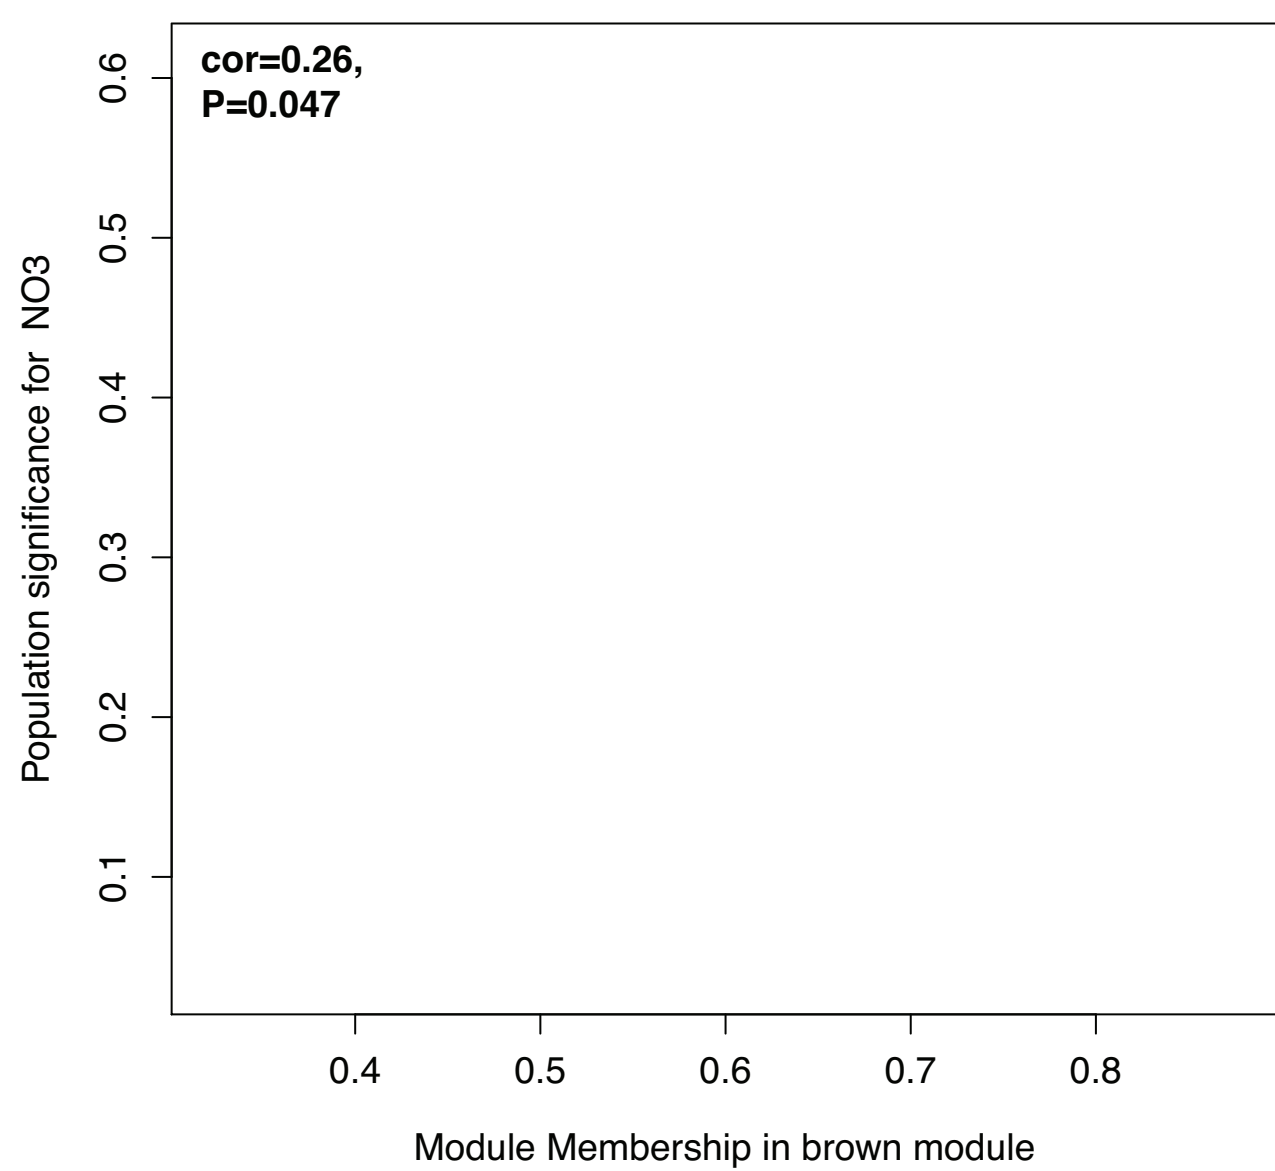

D Module membership vs. population significance

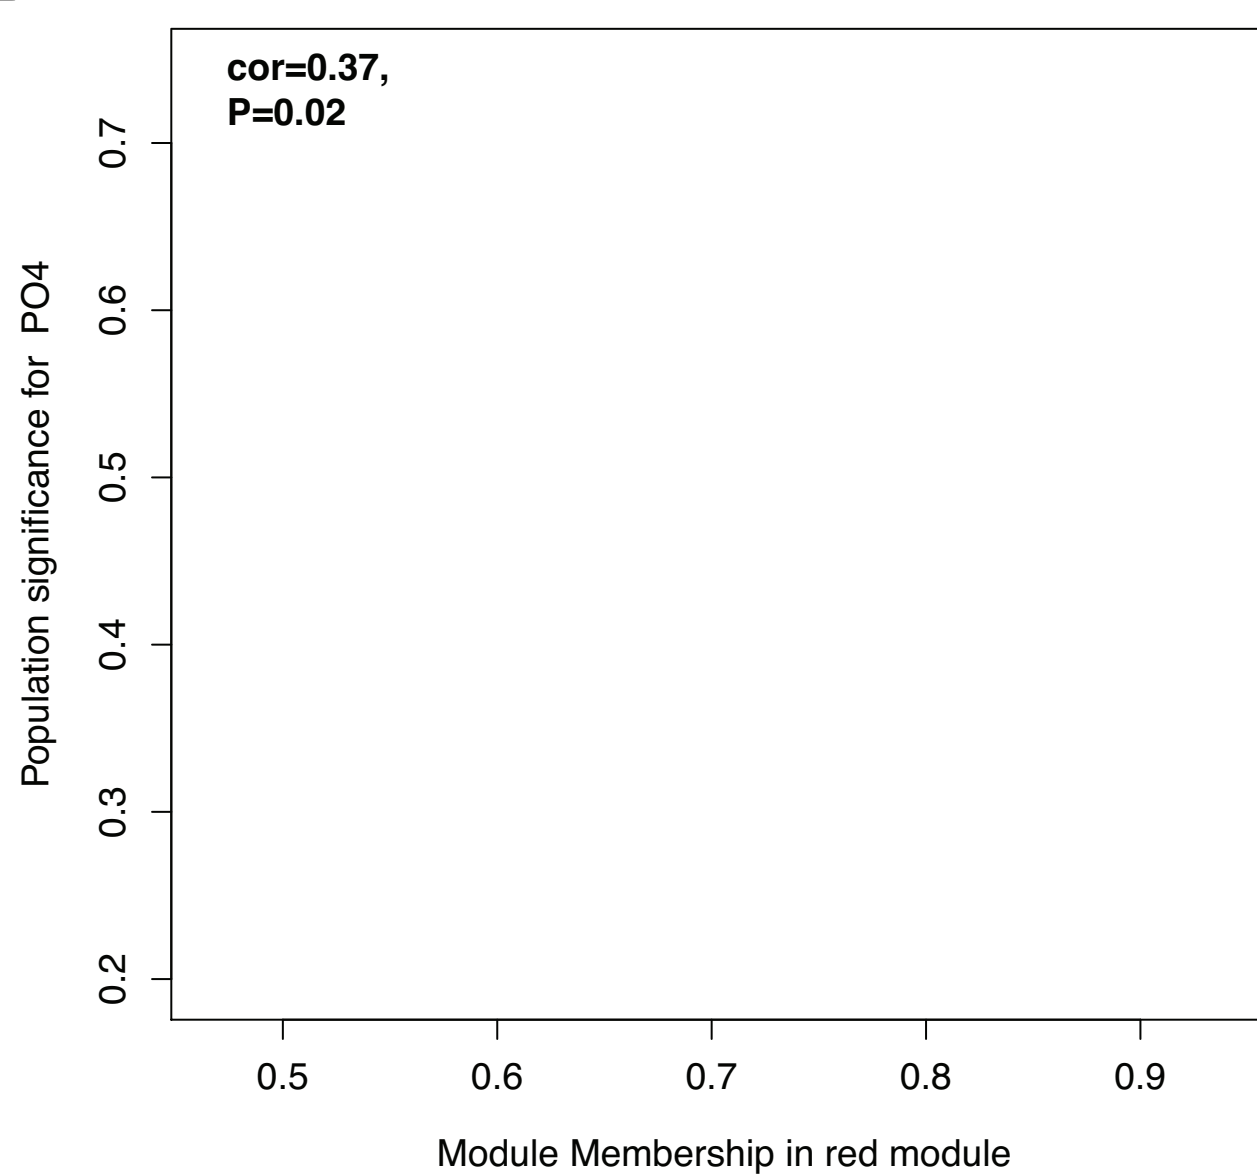C Comparison of  $NO_3$  measured vs predicted for module brown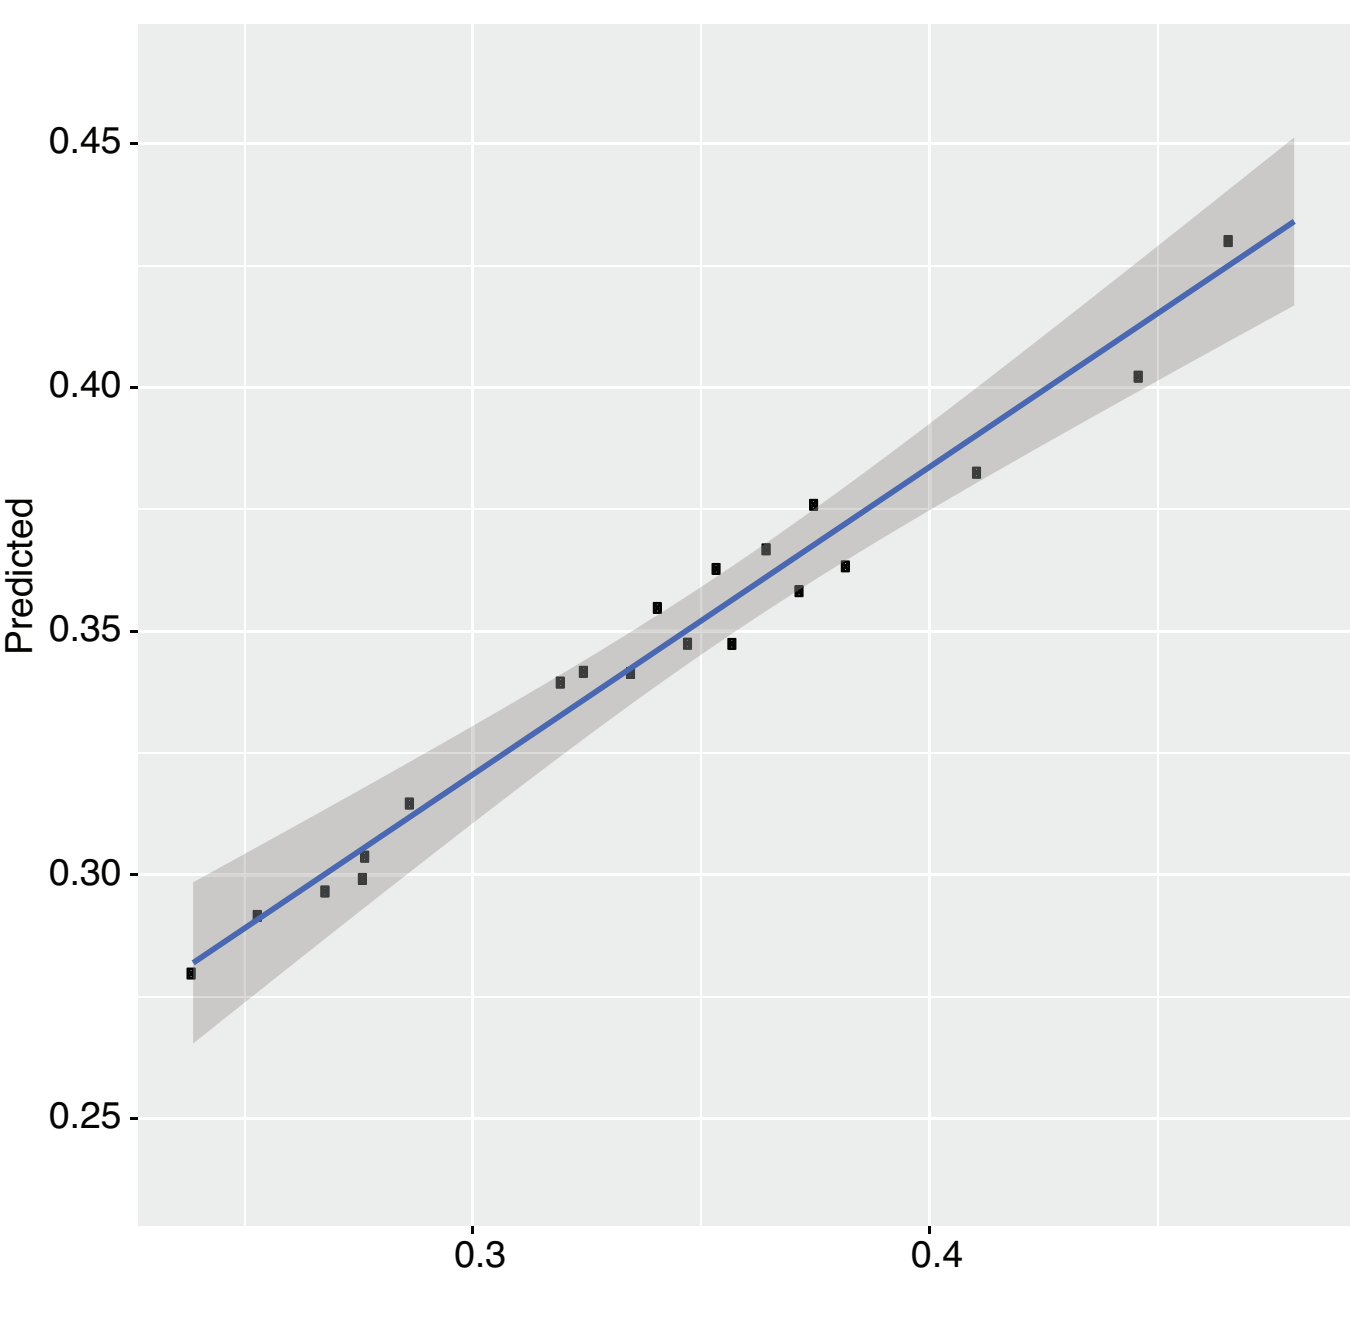E Comparison of  $PO_4$  measured vs predicted for module red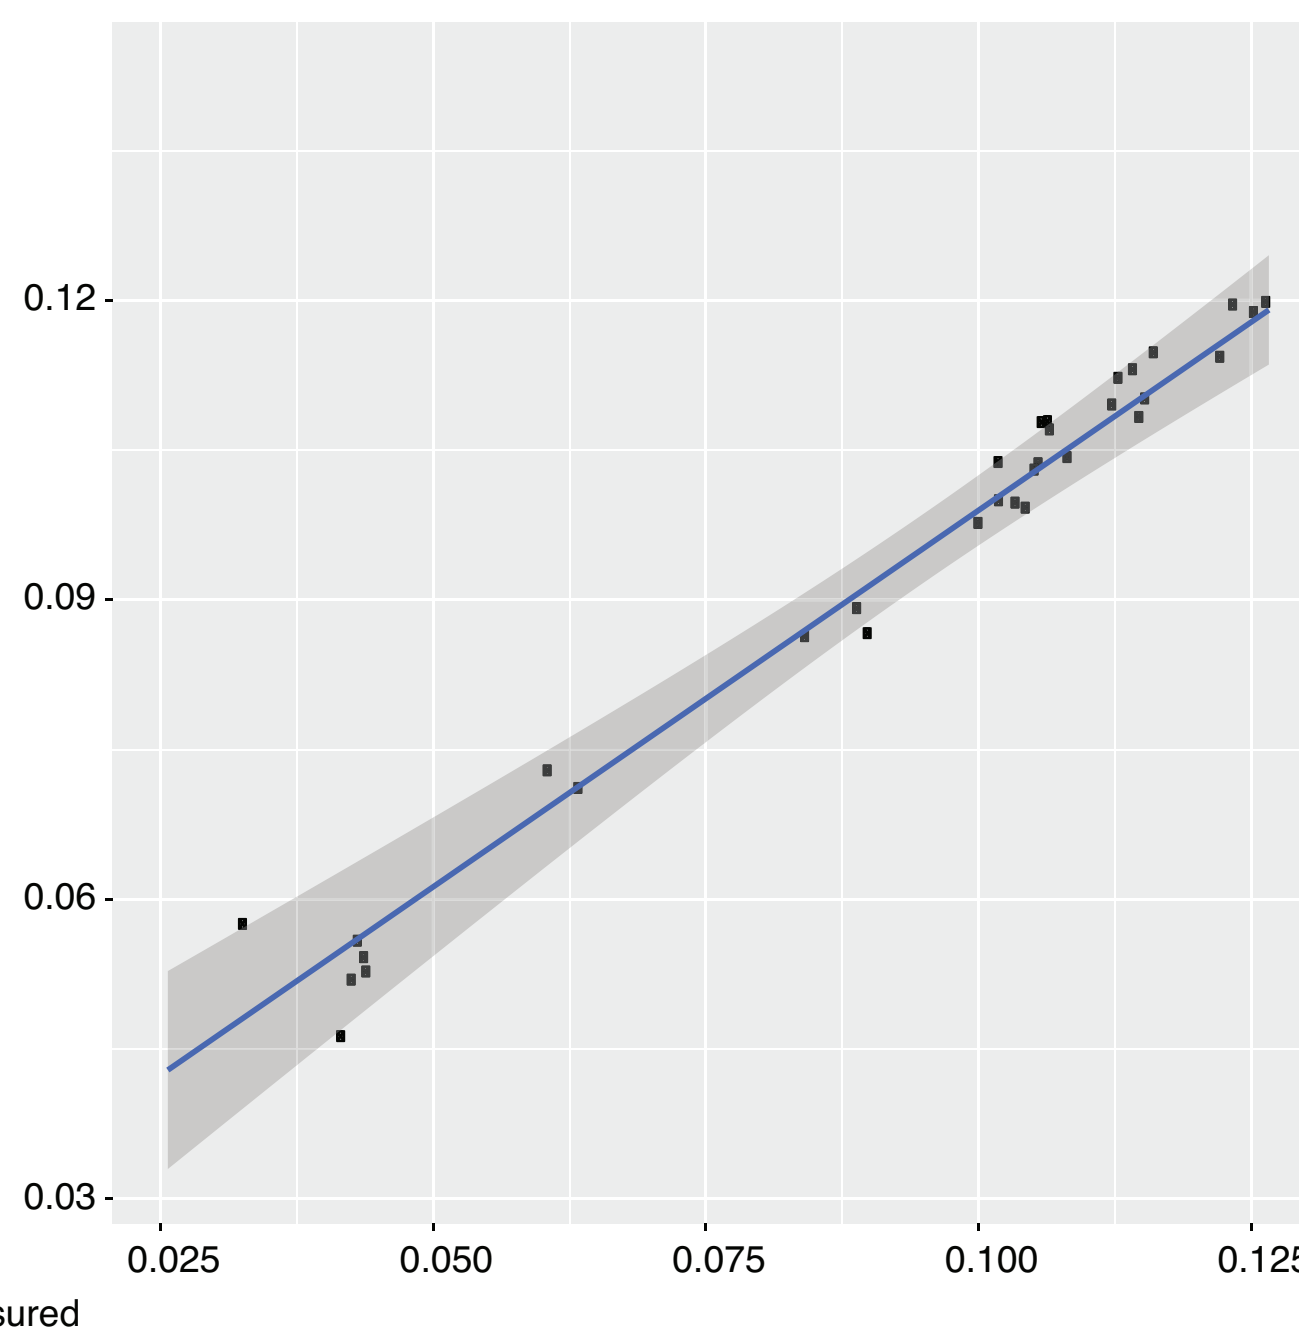

Supplement: Supplementary file [file 091512-1.pdf]
